# Supplementary material for: Interfacial Stress Decoupling enables Ultra-Stable Palladium-based Hydrogen Sensing
Source: Research Square preprint supplement (doi:10.21203/rs.3.rs-6720533/v1), 2025-06-12
Supplement: Supplementary file 1 [file 549f606a75f54d0b01495d47.xlsx]

## Sheet: Figure 1d
	Conc. of H2 H/Pd	Cell parameter a(nm)	Cell volume (nm3)	Volume expansion ratio (%)
	0	3.88179	58.4919	4.26326e-14
	0.2	3.93517	60.9383	2.44639
	0.3	3.95388	61.8115	3.31954
	0.4	3.97683	62.8943	4.40243
	0.5	4.00866	64.4164	5.92448
	0.6	4.03426	65.6588	7.16691
	0.7	4.05116	66.4872	7.9953
	0.8	4.1303	70.4602	11.9683

## Sheet: Figure 1e
	Bond type	Bond energy/eV
	Pd-Pd	-0.99
	Pd-Au	-1.66
	Au-Au	-2.33287
	Pd-S	-3.45
	C-S	-3.82
	C-C	-4.4
	Au-S	-3.08

## Sheet: Figure 2d
2 theta (degree)	Intensity (cps)
5	183.333
5.02	125
5.04	125
5.06	158.333
5.08	133.333
5.1	91.6667
5.12	91.6667
5.14	125
5.16	108.333
5.18	116.667
5.2	166.667
5.22	150
5.24	83.3333
5.26	50
5.28	150
5.3	166.667
5.32	100
5.34	83.3333
5.36	116.667
5.38	75
5.4	158.333
5.42	133.333
5.44	100
5.46	125
5.48	100
5.5	125
5.52	125
5.54	125
5.56	125
5.58	83.3333
5.6	108.333
5.62	125
5.64	91.6667
5.66	133.333
5.68	158.333
5.7	133.333
5.72	66.6667
5.74	125
5.76	141.667
5.78	133.333
5.8	66.6667
5.82	100
5.84	125
5.86	91.6667
5.88	50
5.9	91.6667
5.92	58.3333
5.94	116.667
5.96	116.667
5.98	125
6	125
6.02	66.6667
6.04	33.3333
6.06	116.667
6.08	125
6.1	41.6667
6.12	108.333
6.14	75
6.16	75
6.18	150
6.2	33.3333
6.22	91.6667
6.24	75
6.26	83.3333
6.28	91.6667
6.3	41.6667
6.32	50
6.34	58.3333
6.36	83.3333
6.38	116.667
6.4	91.6667
6.42	100
6.44	75
6.46	75
6.48	58.3333
6.5	100
6.52	83.3333
6.54	75
6.56	66.6667
6.58	83.3333
6.6	83.3333
6.62	66.6667
6.64	91.6667
6.66	91.6667
6.68	116.667
6.7	75
6.72	83.3333
6.74	50
6.76	91.6667
6.78	50
6.8	91.6667
6.82	83.3333
6.84	83.3333
6.86	75
6.88	75
6.9	141.667
6.92	33.3333
6.94	116.667
6.96	83.3333
6.98	50
7	58.3333
7.02	33.3333
7.04	50
7.06	58.3333
7.08	41.6667
7.1	41.6667
7.12	66.6667
7.14	91.6667
7.16	83.3333
7.18	66.6667
7.2	58.3333
7.22	116.667
7.24	8.33333
7.26	91.6667
7.28	83.3333
7.3	50
7.32	66.6667
7.34	50
7.36	50
7.38	58.3333
7.4	75
7.42	33.3333
7.44	58.3333
7.46	75
7.48	116.667
7.5	66.6667
7.52	50
7.54	16.6667
7.56	41.6667
7.58	25
7.6	58.3333
7.62	66.6667
7.64	83.3333
7.66	41.6667
7.68	16.6667
7.7	66.6667
7.72	108.333
7.74	58.3333
7.76	33.3333
7.78	33.3333
7.8	33.3333
7.82	66.6667
7.84	83.3333
7.86	58.3333
7.88	66.6667
7.9	25
7.92	91.6667
7.94	58.3333
7.96	66.6667
7.98	66.6667
8	41.6667
8.02	83.3333
8.04	75
8.06	25
8.08	66.6667
8.1	16.6667
8.12	50
8.14	66.6667
8.16	75
8.18	41.6667
8.2	25
8.22	58.3333
8.24	50
8.26	16.6667
8.28	33.3333
8.3	33.3333
8.32	50
8.34	33.3333
8.36	33.3333
8.38	8.33333
8.4	41.6667
8.42	83.3333
8.44	41.6667
8.46	33.3333
8.48	41.6667
8.5	50
8.52	41.6667
8.54	75
8.56	41.6667
8.58	33.3333
8.6	91.6667
8.62	41.6667
8.64	33.3333
8.66	66.6667
8.68	33.3333
8.7	25
8.72	25
8.74	50
8.76	50
8.78	25
8.8	66.6667
8.82	16.6667
8.84	33.3333
8.86	50
8.88	58.3333
8.9	50
8.92	16.6667
8.94	33.3333
8.96	33.3333
8.98	33.3333
9	41.6667
9.02	58.3333
9.04	41.6667
9.06	50
9.08	83.3333
9.1	58.3333
9.12	50
9.14	41.6667
9.16	33.3333
9.18	41.6667
9.2	33.3333
9.22	33.3333
9.24	41.6667
9.26	75
9.28	33.3333
9.3	58.3333
9.32	50
9.34	50
9.36	58.3333
9.38	16.6667
9.4	33.3333
9.42	66.6667
9.44	50
9.46	50
9.48	41.6667
9.5	25
9.52	75
9.54	66.6667
9.56	41.6667
9.58	50
9.6	58.3333
9.62	75
9.64	33.3333
9.66	33.3333
9.68	33.3333
9.7	66.6667
9.72	33.3333
9.74	50
9.76	58.3333
9.78	16.6667
9.8	33.3333
9.82	33.3333
9.84	75
9.86	41.6667
9.88	58.3333
9.9	50
9.92	41.6667
9.94	58.3333
9.96	25
9.98	66.6667
10	25
10.02	50
10.04	16.6667
10.06	50
10.08	25
10.1	58.3333
10.12	41.6667
10.14	50
10.16	41.6667
10.18	41.6667
10.2	58.3333
10.22	83.3333
10.24	16.6667
10.26	50
10.28	41.6667
10.3	75
10.32	25
10.34	16.6667
10.36	41.6667
10.38	41.6667
10.4	41.6667
10.42	16.6667
10.44	41.6667
10.46	66.6667
10.48	66.6667
10.5	50
10.52	16.6667
10.54	33.3333
10.56	41.6667
10.58	33.3333
10.6	41.6667
10.62	41.6667
10.64	58.3333
10.66	66.6667
10.68	58.3333
10.7	75
10.72	58.3333
10.74	25
10.76	66.6667
10.78	66.6667
10.8	58.3333
10.82	50
10.84	8.33333
10.86	33.3333
10.88	66.6667
10.9	33.3333
10.92	33.3333
10.94	33.3333
10.96	16.6667
10.98	41.6667
11	33.3333
11.02	75
11.04	41.6667
11.06	58.3333
11.08	41.6667
11.1	58.3333
11.12	0
11.14	33.3333
11.16	66.6667
11.18	25
11.2	41.6667
11.22	58.3333
11.24	41.6667
11.26	25
11.28	41.6667
11.3	41.6667
11.32	58.3333
11.34	41.6667
11.36	50
11.38	8.33333
11.4	8.33333
11.42	50
11.44	33.3333
11.46	33.3333
11.48	25
11.5	66.6667
11.52	50
11.54	33.3333
11.56	41.6667
11.58	25
11.6	41.6667
11.62	25
11.64	33.3333
11.66	33.3333
11.68	58.3333
11.7	41.6667
11.72	8.33333
11.74	25
11.76	25
11.78	16.6667
11.8	33.3333
11.82	33.3333
11.84	41.6667
11.86	33.3333
11.88	50
11.9	33.3333
11.92	58.3333
11.94	33.3333
11.96	41.6667
11.98	33.3333
12	50
12.02	33.3333
12.04	50
12.06	16.6667
12.08	33.3333
12.1	58.3333
12.12	41.6667
12.14	33.3333
12.16	33.3333
12.18	25
12.2	25
12.22	83.3333
12.24	58.3333
12.26	41.6667
12.28	16.6667
12.3	25
12.32	50
12.34	33.3333
12.36	25
12.38	25
12.4	33.3333
12.42	66.6667
12.44	41.6667
12.46	50
12.48	8.33333
12.5	41.6667
12.52	58.3333
12.54	33.3333
12.56	41.6667
12.58	41.6667
12.6	33.3333
12.62	33.3333
12.64	33.3333
12.66	0
12.68	41.6667
12.7	66.6667
12.72	8.33333
12.74	58.3333
12.76	16.6667
12.78	25
12.8	25
12.82	25
12.84	16.6667
12.86	16.6667
12.88	33.3333
12.9	33.3333
12.92	25
12.94	25
12.96	41.6667
12.98	33.3333
13	33.3333
13.02	41.6667
13.04	58.3333
13.06	33.3333
13.08	41.6667
13.1	25
13.12	16.6667
13.14	41.6667
13.16	25
13.18	25
13.2	16.6667
13.22	41.6667
13.24	50
13.26	58.3333
13.28	33.3333
13.3	41.6667
13.32	41.6667
13.34	50
13.36	0
13.38	50
13.4	50
13.42	33.3333
13.44	58.3333
13.46	25
13.48	25
13.5	16.6667
13.52	33.3333
13.54	25
13.56	33.3333
13.58	25
13.6	66.6667
13.62	41.6667
13.64	8.33333
13.66	66.6667
13.68	33.3333
13.7	16.6667
13.72	58.3333
13.74	50
13.76	33.3333
13.78	33.3333
13.8	41.6667
13.82	16.6667
13.84	75
13.86	8.33333
13.88	41.6667
13.9	50
13.92	41.6667
13.94	41.6667
13.96	25
13.98	8.33333
14	25
14.02	8.33333
14.04	41.6667
14.06	41.6667
14.08	8.33333
14.1	33.3333
14.12	25
14.14	50
14.16	16.6667
14.18	8.33333
14.2	41.6667
14.22	75
14.24	16.6667
14.26	50
14.28	50
14.3	8.33333
14.32	25
14.34	25
14.36	58.3333
14.38	50
14.4	58.3333
14.42	25
14.44	41.6667
14.46	41.6667
14.48	41.6667
14.5	75
14.52	25
14.54	33.3333
14.56	41.6667
14.58	33.3333
14.6	16.6667
14.62	16.6667
14.64	41.6667
14.66	50
14.68	33.3333
14.7	8.33333
14.72	41.6667
14.74	33.3333
14.76	41.6667
14.78	25
14.8	0
14.82	25
14.84	41.6667
14.86	8.33333
14.88	33.3333
14.9	33.3333
14.92	41.6667
14.94	25
14.96	25
14.98	66.6667
15	8.33333
15.02	8.33333
15.04	50
15.06	75
15.08	33.3333
15.1	41.6667
15.12	16.6667
15.14	50
15.16	25
15.18	33.3333
15.2	50
15.22	25
15.24	16.6667
15.26	25
15.28	33.3333
15.3	50
15.32	50
15.34	8.33333
15.36	25
15.38	41.6667
15.4	41.6667
15.42	33.3333
15.44	41.6667
15.46	41.6667
15.48	41.6667
15.5	66.6667
15.52	25
15.54	25
15.56	33.3333
15.58	33.3333
15.6	58.3333
15.62	41.6667
15.64	25
15.66	41.6667
15.68	16.6667
15.7	41.6667
15.72	25
15.74	25
15.76	8.33333
15.78	8.33333
15.8	41.6667
15.82	50
15.84	58.3333
15.86	25
15.88	33.3333
15.9	50
15.92	16.6667
15.94	25
15.96	8.33333
15.98	33.3333
16	16.6667
16.02	16.6667
16.04	33.3333
16.06	41.6667
16.08	25
16.1	50
16.12	91.6667
16.14	66.6667
16.16	50
16.18	41.6667
16.2	8.33333
16.22	25
16.24	50
16.26	25
16.28	75
16.3	50
16.32	33.3333
16.34	66.6667
16.36	66.6667
16.38	41.6667
16.4	25
16.42	33.3333
16.44	58.3333
16.46	41.6667
16.48	41.6667
16.5	50
16.52	58.3333
16.54	33.3333
16.56	50
16.58	58.3333
16.6	66.6667
16.62	58.3333
16.64	8.33333
16.66	33.3333
16.68	33.3333
16.7	41.6667
16.72	0
16.74	25
16.76	83.3333
16.78	41.6667
16.8	50
16.82	33.3333
16.84	25
16.86	16.6667
16.88	50
16.9	25
16.92	33.3333
16.94	50
16.96	41.6667
16.98	58.3333
17	25
17.02	41.6667
17.04	33.3333
17.06	25
17.08	41.6667
17.1	33.3333
17.12	58.3333
17.14	33.3333
17.16	41.6667
17.18	25
17.2	41.6667
17.22	8.33333
17.24	25
17.26	41.6667
17.28	50
17.3	58.3333
17.32	16.6667
17.34	50
17.36	33.3333
17.38	50
17.4	33.3333
17.42	58.3333
17.44	16.6667
17.46	25
17.48	66.6667
17.5	66.6667
17.52	66.6667
17.54	25
17.56	33.3333
17.58	50
17.6	33.3333
17.62	50
17.64	41.6667
17.66	91.6667
17.68	50
17.7	25
17.72	50
17.74	33.3333
17.76	8.33333
17.78	66.6667
17.8	33.3333
17.82	33.3333
17.84	50
17.86	8.33333
17.88	58.3333
17.9	75
17.92	25
17.94	50
17.96	16.6667
17.98	16.6667
18	33.3333
18.02	58.3333
18.04	33.3333
18.06	8.33333
18.08	16.6667
18.1	41.6667
18.12	33.3333
18.14	16.6667
18.16	33.3333
18.18	58.3333
18.2	83.3333
18.22	41.6667
18.24	58.3333
18.26	50
18.28	75
18.3	33.3333
18.32	16.6667
18.34	16.6667
18.36	75
18.38	50
18.4	41.6667
18.42	8.33333
18.44	50
18.46	50
18.48	16.6667
18.5	33.3333
18.52	33.3333
18.54	41.6667
18.56	58.3333
18.58	41.6667
18.6	41.6667
18.62	33.3333
18.64	66.6667
18.66	33.3333
18.68	66.6667
18.7	41.6667
18.72	33.3333
18.74	75
18.76	83.3333
18.78	50
18.8	75
18.82	50
18.84	50
18.86	33.3333
18.88	58.3333
18.9	58.3333
18.92	58.3333
18.94	58.3333
18.96	50
18.98	58.3333
19	25
19.02	33.3333
19.04	58.3333
19.06	58.3333
19.08	33.3333
19.1	75
19.12	25
19.14	33.3333
19.16	41.6667
19.18	33.3333
19.2	33.3333
19.22	75
19.24	8.33333
19.26	41.6667
19.28	41.6667
19.3	25
19.32	58.3333
19.34	66.6667
19.36	41.6667
19.38	75
19.4	25
19.42	41.6667
19.44	75
19.46	41.6667
19.48	41.6667
19.5	50
19.52	33.3333
19.54	25
19.56	66.6667
19.58	33.3333
19.6	66.6667
19.62	41.6667
19.64	41.6667
19.66	50
19.68	75
19.7	58.3333
19.72	16.6667
19.74	50
19.76	41.6667
19.78	8.33333
19.8	41.6667
19.82	75
19.84	50
19.86	50
19.88	25
19.9	33.3333
19.92	58.3333
19.94	75
19.96	66.6667
19.98	41.6667
20	58.3333
20.02	58.3333
20.04	33.3333
20.06	41.6667
20.08	41.6667
20.1	50
20.12	66.6667
20.14	50
20.16	108.333
20.18	41.6667
20.2	50
20.22	66.6667
20.24	41.6667
20.26	66.6667
20.28	100
20.3	50
20.32	58.3333
20.34	58.3333
20.36	16.6667
20.38	58.3333
20.4	50
20.42	50
20.44	41.6667
20.46	66.6667
20.48	58.3333
20.5	25
20.52	16.6667
20.54	41.6667
20.56	125
20.58	58.3333
20.6	75
20.62	91.6667
20.64	50
20.66	41.6667
20.68	33.3333
20.7	50
20.72	75
20.74	66.6667
20.76	66.6667
20.78	50
20.8	33.3333
20.82	41.6667
20.84	58.3333
20.86	41.6667
20.88	50
20.9	116.667
20.92	83.3333
20.94	33.3333
20.96	83.3333
20.98	66.6667
21	41.6667
21.02	41.6667
21.04	41.6667
21.06	25
21.08	33.3333
21.1	58.3333
21.12	83.3333
21.14	41.6667
21.16	75
21.18	58.3333
21.2	50
21.22	58.3333
21.24	41.6667
21.26	41.6667
21.28	75
21.3	41.6667
21.32	75
21.34	25
21.36	50
21.38	50
21.4	41.6667
21.42	83.3333
21.44	25
21.46	50
21.48	83.3333
21.5	33.3333
21.52	58.3333
21.54	66.6667
21.56	33.3333
21.58	91.6667
21.6	41.6667
21.62	66.6667
21.64	25
21.66	66.6667
21.68	66.6667
21.7	58.3333
21.72	50
21.74	16.6667
21.76	50
21.78	66.6667
21.8	66.6667
21.82	58.3333
21.84	58.3333
21.86	41.6667
21.88	50
21.9	75
21.92	33.3333
21.94	58.3333
21.96	41.6667
21.98	58.3333
22	66.6667
22.02	8.33333
22.04	41.6667
22.06	66.6667
22.08	58.3333
22.1	50
22.12	83.3333
22.14	75
22.16	41.6667
22.18	58.3333
22.2	58.3333
22.22	66.6667
22.24	75
22.26	58.3333
22.28	75
22.3	50
22.32	50
22.34	58.3333
22.36	66.6667
22.38	41.6667
22.4	33.3333
22.42	66.6667
22.44	33.3333
22.46	41.6667
22.48	66.6667
22.5	50
22.52	100
22.54	83.3333
22.56	83.3333
22.58	50
22.6	41.6667
22.62	50
22.64	75
22.66	83.3333
22.68	25
22.7	33.3333
22.72	75
22.74	25
22.76	75
22.78	25
22.8	58.3333
22.82	75
22.84	58.3333
22.86	50
22.88	58.3333
22.9	33.3333
22.92	58.3333
22.94	83.3333
22.96	50
22.98	41.6667
23	75
23.02	75
23.04	25
23.06	66.6667
23.08	50
23.1	50
23.12	83.3333
23.14	75
23.16	66.6667
23.18	41.6667
23.2	33.3333
23.22	41.6667
23.24	33.3333
23.26	0
23.28	83.3333
23.3	50
23.32	83.3333
23.34	66.6667
23.36	66.6667
23.38	75
23.4	50
23.42	25
23.44	41.6667
23.46	41.6667
23.48	91.6667
23.5	50
23.52	50
23.54	58.3333
23.56	33.3333
23.58	83.3333
23.6	25
23.62	41.6667
23.64	25
23.66	41.6667
23.68	58.3333
23.7	16.6667
23.72	25
23.74	33.3333
23.76	66.6667
23.78	66.6667
23.8	66.6667
23.82	100
23.84	83.3333
23.86	50
23.88	25
23.9	66.6667
23.92	75
23.94	33.3333
23.96	41.6667
23.98	33.3333
24	58.3333
24.02	25
24.04	75
24.06	116.667
24.08	58.3333
24.1	41.6667
24.12	66.6667
24.14	58.3333
24.16	66.6667
24.18	33.3333
24.2	58.3333
24.22	66.6667
24.24	33.3333
24.26	50
24.28	58.3333
24.3	75
24.32	25
24.34	50
24.36	75
24.38	108.333
24.4	41.6667
24.42	66.6667
24.44	41.6667
24.46	75
24.48	33.3333
24.5	25
24.52	75
24.54	50
24.56	66.6667
24.58	50
24.6	66.6667
24.62	58.3333
24.64	25
24.66	33.3333
24.68	33.3333
24.7	58.3333
24.72	41.6667
24.74	33.3333
24.76	66.6667
24.78	25
24.8	91.6667
24.82	33.3333
24.84	66.6667
24.86	25
24.88	75
24.9	58.3333
24.92	58.3333
24.94	100
24.96	25
24.98	58.3333
25	25
25.02	50
25.04	66.6667
25.06	41.6667
25.08	41.6667
25.1	25
25.12	41.6667
25.14	25
25.16	50
25.18	66.6667
25.2	50
25.22	91.6667
25.24	75
25.26	66.6667
25.28	50
25.3	50
25.32	100
25.34	41.6667
25.36	41.6667
25.38	16.6667
25.4	91.6667
25.42	75
25.44	108.333
25.46	50
25.48	41.6667
25.5	58.3333
25.52	58.3333
25.54	33.3333
25.56	41.6667
25.58	75
25.6	58.3333
25.62	58.3333
25.64	50
25.66	50
25.68	75
25.7	58.3333
25.72	66.6667
25.74	50
25.76	33.3333
25.78	33.3333
25.8	25
25.82	41.6667
25.84	33.3333
25.86	75
25.88	75
25.9	16.6667
25.92	116.667
25.94	33.3333
25.96	58.3333
25.98	58.3333
26	66.6667
26.02	41.6667
26.04	50
26.06	50
26.08	58.3333
26.1	41.6667
26.12	91.6667
26.14	75
26.16	25
26.18	41.6667
26.2	41.6667
26.22	58.3333
26.24	25
26.26	41.6667
26.28	33.3333
26.3	50
26.32	100
26.34	33.3333
26.36	33.3333
26.38	58.3333
26.4	50
26.42	41.6667
26.44	83.3333
26.46	41.6667
26.48	33.3333
26.5	41.6667
26.52	58.3333
26.54	50
26.56	58.3333
26.58	25
26.6	33.3333
26.62	75
26.64	66.6667
26.66	75
26.68	75
26.7	8.33333
26.72	75
26.74	41.6667
26.76	41.6667
26.78	33.3333
26.8	75
26.82	33.3333
26.84	33.3333
26.86	50
26.88	58.3333
26.9	58.3333
26.92	75
26.94	58.3333
26.96	41.6667
26.98	33.3333
27	83.3333
27.02	50
27.04	50
27.06	58.3333
27.08	50
27.1	58.3333
27.12	58.3333
27.14	83.3333
27.16	33.3333
27.18	50
27.2	58.3333
27.22	50
27.24	41.6667
27.26	50
27.28	8.33333
27.3	33.3333
27.32	66.6667
27.34	41.6667
27.36	66.6667
27.38	66.6667
27.4	58.3333
27.42	75
27.44	58.3333
27.46	25
27.48	33.3333
27.5	50
27.52	83.3333
27.54	33.3333
27.56	58.3333
27.58	50
27.6	50
27.62	50
27.64	50
27.66	66.6667
27.68	33.3333
27.7	58.3333
27.72	50
27.74	41.6667
27.76	75
27.78	41.6667
27.8	25
27.82	58.3333
27.84	58.3333
27.86	50
27.88	41.6667
27.9	8.33333
27.92	50
27.94	50
27.96	50
27.98	83.3333
28	58.3333
28.02	25
28.04	41.6667
28.06	41.6667
28.08	66.6667
28.1	8.33333
28.12	66.6667
28.14	50
28.16	58.3333
28.18	33.3333
28.2	33.3333
28.22	16.6667
28.24	16.6667
28.26	50
28.28	41.6667
28.3	58.3333
28.32	41.6667
28.34	16.6667
28.36	58.3333
28.38	66.6667
28.4	25
28.42	33.3333
28.44	91.6667
28.46	58.3333
28.48	75
28.5	75
28.52	33.3333
28.54	33.3333
28.56	58.3333
28.58	75
28.6	16.6667
28.62	25
28.64	66.6667
28.66	33.3333
28.68	33.3333
28.7	41.6667
28.72	25
28.74	58.3333
28.76	33.3333
28.78	50
28.8	50
28.82	66.6667
28.84	83.3333
28.86	41.6667
28.88	50
28.9	50
28.92	33.3333
28.94	58.3333
28.96	16.6667
28.98	25
29	58.3333
29.02	8.33333
29.04	41.6667
29.06	83.3333
29.08	66.6667
29.1	33.3333
29.12	50
29.14	66.6667
29.16	16.6667
29.18	100
29.2	25
29.22	25
29.24	75
29.26	16.6667
29.28	41.6667
29.3	25
29.32	16.6667
29.34	16.6667
29.36	100
29.38	66.6667
29.4	25
29.42	33.3333
29.44	66.6667
29.46	41.6667
29.48	58.3333
29.5	41.6667
29.52	25
29.54	83.3333
29.56	41.6667
29.58	25
29.6	41.6667
29.62	50
29.64	58.3333
29.66	8.33333
29.68	25
29.7	8.33333
29.72	41.6667
29.74	33.3333
29.76	58.3333
29.78	58.3333
29.8	75
29.82	50
29.84	33.3333
29.86	58.3333
29.88	33.3333
29.9	50
29.92	50
29.94	50
29.96	25
29.98	41.6667
30	41.6667
30.02	75
30.04	41.6667
30.06	58.3333
30.08	66.6667
30.1	16.6667
30.12	50
30.14	50
30.16	41.6667
30.18	41.6667
30.2	58.3333
30.22	33.3333
30.24	33.3333
30.26	50
30.28	16.6667
30.3	66.6667
30.32	25
30.34	25
30.36	41.6667
30.38	16.6667
30.4	8.33333
30.42	25
30.44	8.33333
30.46	41.6667
30.48	25
30.5	41.6667
30.52	50
30.54	33.3333
30.56	25
30.58	50
30.6	50
30.62	66.6667
30.64	58.3333
30.66	25
30.68	50
30.7	33.3333
30.72	50
30.74	41.6667
30.76	25
30.78	58.3333
30.8	33.3333
30.82	50
30.84	41.6667
30.86	50
30.88	16.6667
30.9	8.33333
30.92	58.3333
30.94	33.3333
30.96	41.6667
30.98	16.6667
31	50
31.02	25
31.04	41.6667
31.06	25
31.08	16.6667
31.1	41.6667
31.12	8.33333
31.14	33.3333
31.16	33.3333
31.18	41.6667
31.2	58.3333
31.22	33.3333
31.24	25
31.26	25
31.28	41.6667
31.3	41.6667
31.32	16.6667
31.34	25
31.36	58.3333
31.38	41.6667
31.4	41.6667
31.42	25
31.44	41.6667
31.46	33.3333
31.48	50
31.5	16.6667
31.52	8.33333
31.54	50
31.56	33.3333
31.58	75
31.6	75
31.62	66.6667
31.64	66.6667
31.66	33.3333
31.68	83.3333
31.7	8.33333
31.72	33.3333
31.74	41.6667
31.76	50
31.78	41.6667
31.8	16.6667
31.82	33.3333
31.84	33.3333
31.86	33.3333
31.88	50
31.9	66.6667
31.92	41.6667
31.94	16.6667
31.96	58.3333
31.98	41.6667
32	25
32.02	16.6667
32.04	50
32.06	58.3333
32.08	25
32.1	41.6667
32.12	41.6667
32.14	41.6667
32.16	33.3333
32.18	25
32.2	25
32.22	25
32.24	50
32.26	41.6667
32.28	41.6667
32.3	41.6667
32.32	41.6667
32.34	50
32.36	41.6667
32.38	33.3333
32.4	16.6667
32.42	41.6667
32.44	25
32.46	83.3333
32.48	25
32.5	33.3333
32.52	33.3333
32.54	58.3333
32.56	33.3333
32.58	25
32.6	33.3333
32.62	25
32.64	25
32.66	41.6667
32.68	8.33333
32.7	33.3333
32.72	25
32.74	75
32.76	8.33333
32.78	33.3333
32.8	33.3333
32.82	33.3333
32.84	75
32.86	41.6667
32.88	50
32.9	8.33333
32.92	33.3333
32.94	33.3333
32.96	33.3333
32.98	83.3333
33	33.3333
33.02	8.33333
33.04	16.6667
33.06	41.6667
33.08	16.6667
33.1	33.3333
33.12	33.3333
33.14	25
33.16	58.3333
33.18	50
33.2	8.33333
33.22	50
33.24	75
33.26	33.3333
33.28	33.3333
33.3	33.3333
33.32	33.3333
33.34	83.3333
33.36	58.3333
33.38	58.3333
33.4	58.3333
33.42	41.6667
33.44	66.6667
33.46	41.6667
33.48	41.6667
33.5	16.6667
33.52	16.6667
33.54	33.3333
33.56	41.6667
33.58	25
33.6	33.3333
33.62	25
33.64	8.33333
33.66	8.33333
33.68	25
33.7	58.3333
33.72	58.3333
33.74	41.6667
33.76	16.6667
33.78	41.6667
33.8	25
33.82	83.3333
33.84	41.6667
33.86	58.3333
33.88	66.6667
33.9	16.6667
33.92	75
33.94	41.6667
33.96	58.3333
33.98	33.3333
34	33.3333
34.02	16.6667
34.04	33.3333
34.06	58.3333
34.08	50
34.1	41.6667
34.12	58.3333
34.14	16.6667
34.16	16.6667
34.18	25
34.2	25
34.22	0
34.24	50
34.26	25
34.28	25
34.3	16.6667
34.32	33.3333
34.34	50
34.36	25
34.38	50
34.4	8.33333
34.42	58.3333
34.44	50
34.46	66.6667
34.48	25
34.5	33.3333
34.52	33.3333
34.54	25
34.56	16.6667
34.58	25
34.6	16.6667
34.62	41.6667
34.64	58.3333
34.66	41.6667
34.68	25
34.7	41.6667
34.72	58.3333
34.74	25
34.76	25
34.78	50
34.8	41.6667
34.82	16.6667
34.84	33.3333
34.86	16.6667
34.88	25
34.9	58.3333
34.92	41.6667
34.94	16.6667
34.96	8.33333
34.98	0
35	25
35.02	16.6667
35.04	16.6667
35.06	33.3333
35.08	8.33333
35.1	33.3333
35.12	41.6667
35.14	16.6667
35.16	8.33333
35.18	41.6667
35.2	16.6667
35.22	16.6667
35.24	50
35.26	58.3333
35.28	25
35.3	41.6667
35.32	33.3333
35.34	58.3333
35.36	25
35.38	16.6667
35.4	25
35.42	25
35.44	50
35.46	25
35.48	8.33333
35.5	0
35.52	16.6667
35.54	16.6667
35.56	16.6667
35.58	8.33333
35.6	41.6667
35.62	33.3333
35.64	16.6667
35.66	50
35.68	33.3333
35.7	58.3333
35.72	58.3333
35.74	8.33333
35.76	33.3333
35.78	33.3333
35.8	16.6667
35.82	25
35.84	8.33333
35.86	41.6667
35.88	83.3333
35.9	16.6667
35.92	41.6667
35.94	8.33333
35.96	50
35.98	41.6667
36	33.3333
36.02	25
36.04	0
36.06	41.6667
36.08	16.6667
36.1	33.3333
36.12	25
36.14	41.6667
36.16	33.3333
36.18	33.3333
36.2	8.33333
36.22	41.6667
36.24	33.3333
36.26	25
36.28	33.3333
36.3	16.6667
36.32	41.6667
36.34	50
36.36	25
36.38	16.6667
36.4	25
36.42	41.6667
36.44	41.6667
36.46	50
36.48	16.6667
36.5	25
36.52	25
36.54	25
36.56	8.33333
36.58	50
36.6	25
36.62	25
36.64	33.3333
36.66	0
36.68	16.6667
36.7	41.6667
36.72	33.3333
36.74	16.6667
36.76	33.3333
36.78	41.6667
36.8	8.33333
36.82	25
36.84	50
36.86	16.6667
36.88	16.6667
36.9	0
36.92	33.3333
36.94	41.6667
36.96	41.6667
36.98	33.3333
37	41.6667
37.02	16.6667
37.04	25
37.06	8.33333
37.08	0
37.1	25
37.12	33.3333
37.14	50
37.16	33.3333
37.18	33.3333
37.2	33.3333
37.22	8.33333
37.24	41.6667
37.26	66.6667
37.28	25
37.3	0
37.32	33.3333
37.34	41.6667
37.36	25
37.38	33.3333
37.4	25
37.42	58.3333
37.44	16.6667
37.46	25
37.48	8.33333
37.5	8.33333
37.52	8.33333
37.54	16.6667
37.56	25
37.58	50
37.6	8.33333
37.62	50
37.64	58.3333
37.66	25
37.68	66.6667
37.7	50
37.72	16.6667
37.74	25
37.76	25
37.78	41.6667
37.8	25
37.82	33.3333
37.84	8.33333
37.86	100
37.88	25
37.9	16.6667
37.92	25
37.94	50
37.96	33.3333
37.98	75
38	41.6667
38.02	33.3333
38.04	41.6667
38.06	16.6667
38.08	25
38.1	58.3333
38.12	41.6667
38.14	75
38.16	50
38.18	75
38.2	75
38.22	66.6667
38.24	25
38.26	50
38.28	66.6667
38.3	50
38.32	116.667
38.34	91.6667
38.36	75
38.38	75
38.4	133.333
38.42	75
38.44	50
38.46	100
38.48	75
38.5	83.3333
38.52	33.3333
38.54	100
38.56	58.3333
38.58	33.3333
38.6	75
38.62	58.3333
38.64	58.3333
38.66	33.3333
38.68	83.3333
38.7	83.3333
38.72	58.3333
38.74	66.6667
38.76	33.3333
38.78	66.6667
38.8	83.3333
38.82	83.3333
38.84	83.3333
38.86	66.6667
38.88	75
38.9	58.3333
38.92	83.3333
38.94	75
38.96	83.3333
38.98	75
39	91.6667
39.02	83.3333
39.04	83.3333
39.06	66.6667
39.08	91.6667
39.1	75
39.12	66.6667
39.14	125
39.16	91.6667
39.18	66.6667
39.2	91.6667
39.22	116.667
39.24	58.3333
39.26	150
39.28	141.667
39.3	125
39.32	141.667
39.34	150
39.36	116.667
39.38	141.667
39.4	158.333
39.42	141.667
39.44	225
39.46	150
39.48	141.667
39.5	208.333
39.52	216.667
39.54	166.667
39.56	216.667
39.58	291.667
39.6	216.667
39.62	266.667
39.64	233.333
39.66	258.333
39.68	291.667
39.7	358.333
39.72	283.333
39.74	366.667
39.76	333.333
39.78	441.667
39.8	433.333
39.82	391.667
39.84	375
39.86	658.333
39.88	533.333
39.9	691.667
39.92	766.667
39.94	891.667
39.96	933.333
39.98	1025
40	1191.67
40.02	1241.67
40.04	1233.33
40.06	1583.33
40.08	1833.33
40.1	1891.67
40.12	1783.33
40.14	2200
40.16	2275
40.18	2300
40.2	2500
40.22	2558.33
40.24	2408.33
40.26	2300
40.28	2375
40.3	2283.33
40.32	2366.67
40.34	2008.33
40.36	1775
40.38	1483.33
40.4	1558.33
40.42	1650
40.44	1225
40.46	1041.67
40.48	933.333
40.5	950
40.52	833.333
40.54	641.667
40.56	683.333
40.58	708.333
40.6	575
40.62	466.667
40.64	583.333
40.66	400
40.68	383.333
40.7	375
40.72	291.667
40.74	300
40.76	250
40.78	283.333
40.8	266.667
40.82	183.333
40.84	241.667
40.86	225
40.88	183.333
40.9	150
40.92	283.333
40.94	208.333
40.96	158.333
40.98	166.667
41	225
41.02	158.333
41.04	133.333
41.06	183.333
41.08	133.333
41.1	158.333
41.12	91.6667
41.14	100
41.16	108.333
41.18	141.667
41.2	116.667
41.22	91.6667
41.24	91.6667
41.26	100
41.28	83.3333
41.3	83.3333
41.32	83.3333
41.34	150
41.36	91.6667
41.38	25
41.4	75
41.42	58.3333
41.44	58.3333
41.46	91.6667
41.48	33.3333
41.5	91.6667
41.52	41.6667
41.54	58.3333
41.56	58.3333
41.58	108.333
41.6	41.6667
41.62	25
41.64	58.3333
41.66	58.3333
41.68	33.3333
41.7	75
41.72	25
41.74	58.3333
41.76	41.6667
41.78	8.33333
41.8	66.6667
41.82	25
41.84	50
41.86	58.3333
41.88	33.3333
41.9	8.33333
41.92	66.6667
41.94	41.6667
41.96	50
41.98	33.3333
42	75
42.02	25
42.04	41.6667
42.06	25
42.08	16.6667
42.1	50
42.12	91.6667
42.14	58.3333
42.16	50
42.18	50
42.2	50
42.22	8.33333
42.24	58.3333
42.26	16.6667
42.28	83.3333
42.3	41.6667
42.32	33.3333
42.34	8.33333
42.36	66.6667
42.38	66.6667
42.4	50
42.42	33.3333
42.44	50
42.46	58.3333
42.48	83.3333
42.5	16.6667
42.52	41.6667
42.54	16.6667
42.56	41.6667
42.58	50
42.6	8.33333
42.62	33.3333
42.64	50
42.66	25
42.68	33.3333
42.7	50
42.72	33.3333
42.74	58.3333
42.76	16.6667
42.78	25
42.8	33.3333
42.82	25
42.84	8.33333
42.86	33.3333
42.88	41.6667
42.9	16.6667
42.92	8.33333
42.94	50
42.96	33.3333
42.98	16.6667
43	25
43.02	50
43.04	25
43.06	41.6667
43.08	41.6667
43.1	16.6667
43.12	33.3333
43.14	25
43.16	8.33333
43.18	16.6667
43.2	33.3333
43.22	16.6667
43.24	16.6667
43.26	25
43.28	8.33333
43.3	16.6667
43.32	33.3333
43.34	41.6667
43.36	0
43.38	8.33333
43.4	33.3333
43.42	58.3333
43.44	16.6667
43.46	50
43.48	25
43.5	83.3333
43.52	41.6667
43.54	33.3333
43.56	16.6667
43.58	58.3333
43.6	58.3333
43.62	16.6667
43.64	41.6667
43.66	33.3333
43.68	41.6667
43.7	58.3333
43.72	16.6667
43.74	50
43.76	33.3333
43.78	25
43.8	16.6667
43.82	50
43.84	33.3333
43.86	50
43.88	50
43.9	33.3333
43.92	16.6667
43.94	25
43.96	41.6667
43.98	33.3333
44	41.6667
44.02	25
44.04	66.6667
44.06	25
44.08	50
44.1	16.6667
44.12	41.6667
44.14	50
44.16	16.6667
44.18	33.3333
44.2	25
44.22	58.3333
44.24	50
44.26	16.6667
44.28	33.3333
44.3	8.33333
44.32	8.33333
44.34	75
44.36	41.6667
44.38	33.3333
44.4	25
44.42	41.6667
44.44	58.3333
44.46	16.6667
44.48	41.6667
44.5	33.3333
44.52	33.3333
44.54	25
44.56	58.3333
44.58	33.3333
44.6	0
44.62	33.3333
44.64	50
44.66	50
44.68	25
44.7	25
44.72	25
44.74	41.6667
44.76	41.6667
44.78	25
44.8	58.3333
44.82	25
44.84	75
44.86	33.3333
44.88	50
44.9	25
44.92	58.3333
44.94	0
44.96	16.6667
[truncated: 1,102 more rows]

## Sheet: Figure 2g
Distance (µm)	Pd Kα1	Au Lα1	C Kα1_2	S Kα1	Si Kα1	O Kα1
0	0	3	0	0	17	5
0.000608304	0	0	1	0	18	4
0.00121661	0	0	2	0	18	8
0.00182491	0	1	0	0	12	5
0.00243321	0	0	1	0	12	6
0.00304152	0	0	0	0	14	5
0.00364982	0	0	2	0	22	6
0.00425813	0	0	1	0	24	7
0.00486643	0	0	1	0	14	4
0.00547473	0	1	1	0	12	8
0.00608304	0	0	0	0	13	4
0.00669134	1	0	0	0	16	16
0.00729964	0	0	2	0	12	7
0.00790795	0	0	1	1	10	6
0.00851625	0	0	1	0	13	7
0.00912456	0	0	1	0	12	12
0.00973286	0	1	0	0	11	6
0.0103412	0	1	1	1	21	10
0.0109495	0	1	1	0	14	6
0.0115578	0	0	0	0	14	13
0.0121661	0	0	0	0	11	11
0.0127744	0	1	0	0	12	2
0.0133827	0	0	0	0	18	3
0.013991	0	0	0	0	14	4
0.0145993	0	0	1	0	18	8
0.0152076	0	1	2	0	11	4
0.0158159	0	0	1	0	11	4
0.0164242	0	0	1	0	11	10
0.0170325	0	0	0	1	19	4
0.0176408	0	0	1	0	14	5
0.0182491	0	0	1	0	17	5
0.0188574	1	0	1	1	11	10
0.0194657	1	0	1	0	15	8
0.020074	0	1	0	0	17	8
0.0206823	0	0	0	0	21	12
0.0212906	1	0	1	0	14	9
0.0218989	0	0	2	0	9	9
0.0225072	0	0	0	0	21	10
0.0231155	0	2	1	0	13	12
0.0237238	0	0	1	1	12	7
0.0243321	0	0	1	0	15	6
0.0249405	1	1	0	0	8	4
0.0255488	0	0	1	0	10	10
0.0261571	1	1	0	0	12	8
0.0267654	0	0	0	0	10	4
0.0273737	0	0	1	0	10	7
0.027982	0	0	1	0	12	4
0.0285903	0	0	2	0	9	5
0.0291986	0	0	1	1	13	7
0.0298069	0	0	1	0	21	9
0.0304152	0	1	0	0	9	6
0.0310235	0	0	2	0	20	5
0.0316318	0	0	0	0	15	5
0.0322401	1	0	1	2	15	7
0.0328484	0	0	0	0	25	5
0.0334567	0	0	2	0	17	8
0.034065	0	0	1	1	13	8
0.0346733	0	0	0	0	12	10
0.0352816	0	0	1	1	13	6
0.0358899	0	0	0	1	15	7
0.0364982	0	1	1	1	9	6
0.0371065	0	0	2	0	21	5
0.0377148	0	1	0	2	12	16
0.0383231	0	2	1	1	12	9
0.0389314	0	0	1	1	10	8
0.0395397	0	0	2	0	14	7
0.040148	0	0	0	0	22	6
0.0407563	0	1	0	1	9	11
0.0413647	0	0	0	0	16	7
0.041973	0	0	0	0	15	6
0.0425813	0	1	1	0	21	2
0.0431896	0	0	0	1	15	4
0.0437979	0	0	1	1	13	8
0.0444062	0	1	1	0	15	10
0.0450145	0	0	1	1	18	4
0.0456228	0	0	0	0	20	5
0.0462311	0	0	1	0	16	5
0.0468394	1	0	0	0	17	5
0.0474477	0	1	0	0	12	11
0.048056	0	0	1	3	12	7
0.0486643	2	1	0	1	10	11
0.0492726	1	0	0	1	18	7
0.0498809	0	0	2	0	25	6
0.0504892	0	1	0	0	12	11
0.0510975	0	2	0	1	19	4
0.0517058	0	2	0	0	13	7
0.0523141	0	1	1	1	13	3
0.0529224	0	2	1	0	12	4
0.0535307	0	1	1	0	16	5
0.054139	0	2	0	0	16	8
0.0547473	0	2	2	1	11	13
0.0553556	0	2	0	0	18	7
0.0559639	0	5	0	0	13	5
0.0565722	0	4	0	2	12	13
0.0571805	0	3	0	0	14	6
0.0577889	0	3	2	0	15	8
0.0583972	0	9	1	0	13	8
0.0590055	0	9	1	0	18	6
0.0596138	1	8	0	1	15	7
0.0602221	0	11	1	1	18	8
0.0608304	0	6	0	1	18	10
0.0614387	1	19	3	0	8	7
0.062047	1	17	1	2	19	12
0.0626553	0	18	3	1	17	8
0.0632636	0	26	1	2	11	4
0.0638719	1	23	1	2	12	7
0.0644802	0	20	1	5	8	8
0.0650885	1	37	1	4	11	4
0.0656968	1	36	4	4	15	9
0.0663051	1	51	3	5	12	5
0.0669134	1	38	2	8	11	6
0.0675217	0	47	1	4	11	3
0.06813	0	63	3	5	9	10
0.0687383	1	53	1	6	12	3
0.0693466	5	62	5	8	8	9
0.0699549	2	79	2	9	8	7
0.0705632	2	56	2	4	4	3
0.0711715	0	76	3	4	9	6
0.0717798	3	71	3	11	10	5
0.0723881	2	85	1	8	9	7
0.0729964	2	92	3	9	7	3
0.0736048	3	86	8	6	8	9
0.0742131	2	85	4	11	11	5
0.0748214	2	105	4	13	8	7
0.0754297	2	89	5	7	9	0
0.076038	1	84	4	13	10	2
0.0766463	0	99	6	16	9	5
0.0772546	4	114	2	8	15	2
0.0778629	2	112	3	5	11	4
0.0784712	2	93	2	6	9	7
0.0790795	2	89	2	5	9	2
0.0796878	4	111	2	8	17	7
0.0802961	1	84	5	9	16	7
0.0809044	3	116	2	12	7	3
0.0815127	3	105	3	13	9	6
0.082121	5	98	1	11	12	2
0.0827293	2	119	4	9	13	3
0.0833376	3	101	5	10	14	4
0.0839459	4	118	6	11	4	1
0.0845542	6	109	0	11	10	2
0.0851625	8	106	3	13	8	2
0.0857708	2	114	3	13	7	2
0.0863791	4	104	5	8	17	4
0.0869874	4	97	6	10	11	2
0.0875957	3	98	2	10	7	3
0.088204	4	104	1	11	6	4
0.0888123	1	86	1	11	12	8
0.0894206	5	102	0	14	11	3
0.090029	3	103	5	13	8	6
0.0906373	7	106	6	17	7	3
0.0912456	3	83	4	5	9	1
0.0918539	5	92	5	11	10	4
0.0924622	4	92	1	9	11	3
0.0930705	2	91	3	4	11	2
0.0936788	5	106	2	11	4	3
0.0942871	2	100	3	18	9	2
0.0948954	5	94	5	12	13	5
0.0955037	6	125	2	11	13	2
0.096112	4	110	4	9	9	1
0.0967203	2	108	2	5	6	1
0.0973286	5	90	4	8	8	3
0.0979369	3	97	4	8	7	1
0.0985452	3	110	2	10	5	1
0.0991535	2	99	2	4	10	4
0.0997618	3	82	9	5	10	3
0.10037	4	107	2	8	12	5
0.100978	3	101	3	9	11	1
0.101587	1	111	1	8	11	2
0.102195	4	108	2	9	10	4
0.102803	6	103	4	11	14	4
0.103412	7	99	2	7	8	3
0.10402	2	108	3	12	6	2
0.104628	3	113	4	14	12	3
0.105237	2	112	2	8	11	4
0.105845	4	121	2	11	8	5
0.106453	2	111	5	14	9	3
0.107061	6	99	7	12	6	2
0.10767	2	93	4	10	11	2
0.108278	3	103	3	10	8	0
0.108886	1	111	3	12	7	4
0.109495	1	97	4	10	10	6
0.110103	3	127	1	13	7	4
0.110711	2	102	5	9	6	4
0.11132	4	117	3	9	7	1
0.111928	3	92	4	10	14	4
0.112536	3	93	3	13	15	3
0.113144	7	100	3	8	12	2
0.113753	5	109	2	9	9	2
0.114361	1	114	2	8	4	4
0.114969	0	106	3	9	8	5
0.115578	3	115	0	12	12	1
0.116186	2	107	2	9	9	6
0.116794	5	105	4	8	5	3
0.117403	4	98	2	8	11	6
0.118011	4	104	5	5	10	2
0.118619	3	108	2	11	3	0
0.119228	7	106	4	7	10	4
0.119836	6	100	3	13	12	5
0.120444	4	99	1	17	11	5
0.121052	3	106	3	8	10	8
0.121661	2	103	5	6	11	2
0.122269	3	114	3	8	16	0
0.122877	3	100	3	10	10	6
0.123486	2	103	0	20	10	5
0.124094	4	104	3	11	11	3
0.124702	3	91	2	17	8	3
0.125311	4	107	3	3	9	5
0.125919	3	101	2	11	6	2
0.126527	3	101	1	11	7	2
0.127135	2	107	1	13	15	4
0.127744	6	97	5	14	15	4
0.128352	5	110	1	10	15	5
0.12896	0	103	3	14	11	2
0.129569	7	128	1	9	8	4
0.130177	4	107	5	15	11	4
0.130785	4	111	1	9	7	3
0.131394	3	123	4	14	9	3
0.132002	3	107	5	21	10	4
0.13261	5	96	5	19	10	4
0.133219	5	125	5	17	12	3
0.133827	2	111	3	9	10	2
0.134435	4	118	2	9	11	3
0.135043	6	103	5	10	9	2
0.135652	1	92	4	16	11	6
0.13626	1	100	1	7	10	2
0.136868	2	97	4	8	13	2
0.137477	3	104	0	13	10	0
0.138085	5	119	3	14	8	2
0.138693	3	112	3	9	18	7
0.139302	3	103	3	10	6	4
0.13991	4	82	3	10	5	3
0.140518	2	107	2	12	12	6
0.141126	5	109	3	13	8	4
0.141735	4	101	4	17	8	2
0.142343	9	95	4	11	10	3
0.142951	8	113	5	1	11	3
0.14356	5	99	2	17	9	3
0.144168	4	123	2	10	13	4
0.144776	5	86	2	14	8	2
0.145385	3	99	5	9	9	3
0.145993	1	107	4	11	10	1
0.146601	4	104	4	11	11	4
0.14721	3	119	4	10	18	3
0.147818	4	124	3	13	11	2
0.148426	5	105	4	9	15	3
0.149034	3	109	6	13	6	4
0.149643	3	118	2	12	9	3
0.150251	2	119	2	11	15	3
0.150859	0	104	4	11	10	2
0.151468	3	103	1	8	12	7
0.152076	2	106	3	12	10	5
0.152684	5	127	3	18	14	2
0.153293	3	112	4	15	13	5
0.153901	1	117	1	8	10	4
0.154509	3	108	6	9	9	1
0.155117	7	117	8	9	8	5
0.155726	6	111	3	6	7	5
0.156334	1	99	4	9	8	3
0.156942	2	99	1	13	5	5
0.157551	6	106	3	16	13	2
0.158159	5	92	1	6	10	5
0.158767	4	121	2	10	11	3
0.159376	6	111	5	8	10	3
0.159984	5	120	7	8	9	4
0.160592	3	129	4	11	11	6
0.1612	5	128	3	16	9	4
0.161809	2	109	0	9	7	4
0.162417	6	122	3	7	12	4
0.163025	5	115	4	12	17	3
0.163634	3	103	2	10	10	3
0.164242	2	120	2	9	5	6
0.16485	3	114	2	14	9	4
0.165459	6	118	3	12	10	3
0.166067	4	108	2	14	8	2
0.166675	6	111	4	11	12	7
0.167284	5	109	2	7	11	4
0.167892	6	135	6	8	11	2
0.1685	4	92	3	12	11	2
0.169108	4	113	3	8	14	2
0.169717	6	108	5	12	15	5
0.170325	3	107	4	14	13	0
0.170933	5	113	6	9	9	2
0.171542	5	96	3	13	12	3
0.17215	8	118	1	15	13	7
0.172758	3	119	5	24	12	3
0.173367	4	100	3	15	8	4
0.173975	3	105	7	12	14	2
0.174583	4	121	3	4	7	3
0.175191	4	116	2	21	10	2
0.1758	8	113	5	12	10	8
0.176408	4	121	5	10	5	6
0.177016	4	106	7	14	11	5
0.177625	2	88	4	15	11	2
0.178233	2	127	3	13	10	0
0.178841	2	106	3	7	4	1
0.17945	2	118	1	9	9	3
0.180058	3	116	5	16	8	2
0.180666	2	102	2	11	12	6
0.181275	3	123	2	13	12	3
0.181883	4	117	4	16	14	2
0.182491	6	91	2	13	9	1
0.183099	3	101	4	13	4	2
0.183708	3	109	4	7	6	2
0.184316	5	132	3	10	7	5
0.184924	8	115	2	15	14	3
0.185533	7	118	5	11	10	5
0.186141	2	112	4	11	15	5
0.186749	3	96	2	15	16	4
0.187358	8	124	3	8	9	2
0.187966	6	133	1	13	9	2
0.188574	4	113	3	11	8	1
0.189182	7	109	3	11	10	4
0.189791	4	101	3	23	14	1
0.190399	4	105	4	9	11	2
0.191007	6	145	6	9	13	4
0.191616	6	113	8	11	10	5
0.192224	7	113	2	11	11	3
0.192832	7	116	4	19	7	2
0.193441	3	108	6	11	15	2
0.194049	3	125	6	14	9	2
0.194657	0	110	5	9	10	4
0.195265	4	102	3	13	8	3
0.195874	4	107	4	8	6	2
0.196482	6	131	7	9	13	7
0.19709	4	124	4	19	13	3
0.197699	6	122	0	22	10	4
0.198307	4	121	2	12	11	3
0.198915	7	103	3	10	8	4
0.199524	5	107	5	18	8	0
0.200132	3	123	4	8	12	5
0.20074	3	109	7	10	18	7
0.201349	4	115	1	14	23	8
0.201957	7	129	4	13	10	5
0.202565	4	103	4	16	18	4
0.203173	3	132	5	20	13	2
0.203782	2	98	7	10	11	3
0.20439	5	102	5	7	8	3
0.204998	5	129	3	14	10	3
0.205607	5	127	5	12	11	3
0.206215	4	108	5	13	7	2
0.206823	2	124	6	7	12	5
0.207432	3	116	6	16	7	2
0.20804	3	115	3	13	14	4
0.208648	4	102	3	8	10	6
0.209256	3	111	0	17	9	2
0.209865	5	106	2	9	10	6
0.210473	0	122	4	11	12	10
0.211081	8	128	3	10	10	3
0.21169	2	130	3	12	12	2
0.212298	4	128	1	12	9	5
0.212906	2	120	6	12	11	6
0.213515	4	117	3	21	9	7
0.214123	2	130	6	12	6	2
0.214731	3	114	4	12	10	4
0.21534	5	121	6	10	7	4
0.215948	0	126	6	6	10	5
0.216556	4	102	4	9	9	5
0.217164	2	127	6	15	14	6
0.217773	7	116	2	8	5	3
0.218381	5	124	5	18	12	5
0.218989	4	149	2	14	12	2
0.219598	6	102	5	10	13	5
0.220206	6	132	6	6	11	4
0.220814	4	132	3	13	11	3
0.221423	5	114	4	11	12	7
0.222031	6	111	4	11	4	3
0.222639	5	117	5	12	11	4
0.223247	4	131	6	10	10	4
0.223856	3	107	8	16	9	1
0.224464	4	134	5	13	6	4
0.225072	3	122	3	11	10	3
0.225681	1	132	2	14	14	1
0.226289	6	126	3	9	9	1
0.226897	4	119	3	15	13	2
0.227506	2	131	3	11	14	3
0.228114	3	117	4	9	10	4
0.228722	9	124	3	9	7	3
0.229331	3	100	4	11	9	5
0.229939	4	118	4	16	12	8
0.230547	6	114	5	15	14	7
0.231155	3	136	6	17	15	5
0.231764	3	102	9	12	13	1
0.232372	3	120	1	4	12	2
0.23298	5	133	3	12	15	4
0.233589	3	123	5	12	8	3
0.234197	6	123	1	10	9	6
0.234805	4	119	3	8	8	6
0.235414	4	124	3	15	12	2
0.236022	7	132	4	14	14	4
0.23663	6	116	3	8	8	2
0.237238	3	118	2	17	11	7
0.237847	5	128	5	17	16	4
0.238455	1	131	2	10	11	2
0.239063	5	134	5	16	12	3
0.239672	3	110	7	19	11	5
0.24028	4	129	6	7	7	3
0.240888	6	115	4	13	11	5
0.241497	7	110	4	14	12	3
0.242105	7	122	6	14	7	2
0.242713	4	126	1	11	15	3
0.243321	6	147	9	21	14	4
0.24393	5	103	5	21	12	5
0.244538	5	137	8	14	8	3
0.245146	8	97	4	9	16	4
0.245755	3	115	6	10	12	8
0.246363	2	114	4	11	14	3
0.246971	1	122	2	16	7	4
0.24758	4	120	4	13	11	5
0.248188	5	112	1	17	12	3
0.248796	6	142	5	7	7	3
0.249405	4	124	3	9	13	9
0.250013	1	102	3	13	12	4
0.250621	8	103	2	7	8	5
0.251229	9	108	5	17	9	5
0.251838	4	118	4	11	13	5
0.252446	5	114	3	15	16	2
0.253054	7	91	3	16	6	2
0.253663	5	112	5	14	7	2
0.254271	6	121	6	11	15	2
0.254879	4	116	4	12	7	6
0.255488	8	107	4	9	10	3
0.256096	7	96	4	7	8	3
0.256704	10	72	7	9	6	3
0.257312	12	68	8	9	11	6
0.257921	8	59	4	8	6	4
0.258529	7	72	1	10	6	4
0.259137	9	76	1	1	3	2
0.259746	14	54	3	5	13	6
0.260354	11	54	7	5	6	4
0.260962	22	45	4	9	4	5
0.261571	15	56	2	5	7	0
0.262179	15	42	6	6	6	5
0.262787	18	37	0	6	5	4
0.263396	17	36	2	3	6	5
0.264004	21	48	6	4	10	5
0.264612	24	27	4	5	8	4
0.26522	26	22	5	6	7	3
0.265829	14	21	5	3	2	2
0.266437	18	21	4	5	3	2
0.267045	22	15	1	3	2	0
0.267654	23	16	6	1	2	3
0.268262	18	6	3	1	9	5
0.26887	19	5	0	0	2	4
0.269479	19	1	1	1	6	3
0.270087	20	4	4	2	5	6
0.270695	24	1	6	1	5	8
0.271303	13	1	6	2	3	1
0.271912	20	1	5	2	3	6
0.27252	19	1	4	0	5	5
0.273128	13	1	7	4	4	6
0.273737	29	2	5	3	4	5
0.274345	19	0	6	2	6	8
0.274953	24	2	3	0	3	7
0.275562	21	4	7	1	4	5
0.27617	15	1	4	3	5	4
0.276778	22	0	4	0	0	4
0.277386	25	1	5	0	3	7
0.277995	19	2	3	0	1	5
0.278603	11	2	3	0	4	9
0.279211	17	2	2	3	3	4
0.27982	17	0	5	2	1	6
0.280428	12	3	2	0	2	5
0.281036	11	1	3	1	5	6
0.281645	12	0	4	0	4	6
0.282253	16	0	3	1	0	6
0.282861	19	1	7	0	1	8
0.28347	13	1	3	0	5	4
0.284078	23	3	3	3	2	5
0.284686	12	3	5	1	2	8
0.285294	25	2	8	2	3	2
0.285903	21	2	2	1	1	6
0.286511	18	2	2	1	6	4
0.287119	18	2	5	4	3	7
0.287728	18	1	2	0	2	7
0.288336	18	2	5	0	4	3
0.288944	22	2	4	3	3	4
0.289553	19	4	7	3	3	6
0.290161	21	2	3	1	3	3
0.290769	26	2	4	0	5	7
0.291377	19	1	5	1	2	7
0.291986	17	0	5	0	3	8
0.292594	20	0	5	0	3	7
0.293202	16	5	7	2	5	10
0.293811	12	1	4	0	3	5
0.294419	11	0	7	1	5	11
0.295027	19	1	6	0	3	6
0.295636	26	2	8	3	5	5
0.296244	23	0	4	0	4	6
0.296852	11	2	7	0	3	6
0.297461	16	1	2	3	3	8
0.298069	21	1	3	0	3	6
0.298677	19	0	9	1	3	2
0.299285	20	0	3	4	1	12
0.299894	23	0	10	3	3	4
0.300502	18	3	1	3	1	9
0.30111	13	3	6	1	5	6
0.301719	19	0	8	2	4	6
0.302327	17	4	6	1	8	9
0.302935	30	0	7	0	2	5
0.303544	20	1	7	0	2	5

## Sheet: FIgure 2h
	B.E.(eV)	Raw Intensity	Peak Sum	Background	Peak 1	Peak 2	Peak 3	Peak 4	Peak 5	difference			B.E.(eV)	Raw Intensity	Peak Sum	Background	Peak 1	Peak 2	Peak 3	Peak 4	Peak 5	difference
1,10-Decanedithiol grown on Au	174.8	61491.7										1,10-Decanedithiol grown on Pd	175.4	12459.7
	174.7	60995.2											175.3	12350.6
	174.6	60904.6											175.2	12327.8
	174.5	61202.5											175.1	12325.4
	174.4	61541.1											175	12326.2
	174.3	61184.5											174.9	12222.3
	174.2	61303.4											174.8	12281.1
	174.1	61405.1											174.7	12372.6
	174	61550.4											174.6	12530.5
	173.9	61505.2											174.5	12400.6
	173.8	61728.9											174.4	12406
	173.7	61316.7											174.3	12337.4
	173.6	61093.8											174.2	12260.2
	173.5	61243.2											174.1	12194.5
	173.4	61590.2											174	12287.9
	173.3	61732.8											173.9	12208
	173.2	61375.9											173.8	12173.6
	173.1	61329.8											173.7	12197.6
	173	61169.8											173.6	12156.7
	172.9	61409.4											173.5	12304.9
	172.8	61774.4											173.4	12250.1
	172.7	61649.1											173.3	12302.5
	172.6	61385.6											173.2	12347.4
	172.5	61218.3											173.1	12340.6
	172.4	61120.7	61399.6	61120.7	61120.7	61132.5	61129.2	61123	61377	-278.871			173	12282.4
	172.3	61667	61425.4	61136.5	61136.5	61148.5	61145.1	61138.8	61402.3	241.598			172.9	12222.7
	172.2	61983.8	61451.6	61152.2	61152.2	61164.6	61161.1	61154.7	61428	532.227			172.8	12333
	172.1	61694.4	61478.1	61168	61168	61180.6	61177.1	61170.5	61453.9	216.316			172.7	12300
	172	61703.6	61504.9	61183.8	61183.8	61196.7	61193	61186.3	61480.2	198.668			172.6	12388.9
	171.9	61705.2	61532.1	61199.5	61199.5	61212.8	61209	61202.1	61506.9	173.07			172.5	12284.7
	171.8	61660.5	61559.6	61215.3	61215.3	61228.8	61225	61217.9	61533.8	100.856			172.4	12221.2
	171.7	61746.7	61587.5	61231.1	61231.1	61244.9	61241	61233.8	61561	159.203			172.3	12380.9
	171.6	61286.1	61615.7	61246.8	61246.8	61261.1	61257	61249.6	61588.6	-329.566			172.2	12149.7	12186.4	12149.7	12156	12154.9	12149.7	12149.7	12175	-36.7315
	171.5	61649.4	61644.2	61262.6	61262.6	61277.2	61273	61265.4	61616.4	5.25			172.1	12246.1	12188.4	12149.7	12156.1	12155	12149.7	12149.7	12176.6	57.7471
	171.4	61961.9	61672.9	61278.4	61278.4	61293.3	61289	61281.2	61644.5	288.981			172	12471.1	12190.4	12149.6	12156.2	12155	12149.6	12149.6	12178.4	280.703
	171.3	62153	61702	61294.2	61294.2	61309.5	61305.1	61297.1	61672.8	451.035			171.9	12176.2	12192.5	12149.2	12156	12154.8	12149.2	12149.2	12180.1	-16.252
	171.2	61726.6	61731.3	61309.9	61309.9	61325.6	61321.1	61312.9	61701.4	-4.66016			171.8	12267.2	12195.2	12149.2	12156.2	12154.9	12149.2	12149.2	12182.5	72.0283
	171.1	61575.7	61760.8	61325.7	61325.7	61341.8	61337.1	61328.7	61730.2	-185.09			171.7	12225.3	12198.2	12149	12156.2	12154.9	12149	12149	12185.1	27.1357
	171	61262.9	61790.5	61341.5	61341.5	61358	61353.2	61344.6	61759.1	-527.617			171.6	12237.3	12201.6	12149	12156.4	12155	12149	12149	12188.2	35.6543
	170.9	61416.8	61820.4	61357.2	61357.2	61374.3	61369.3	61360.4	61788.2	-403.609			171.5	12116.6	12205.6	12148.9	12156.5	12155	12148.9	12148.9	12191.9	-89.0254
	170.8	61550.6	61850.4	61373	61373	61390.5	61385.3	61376.3	61817.3	-299.816			171.4	12035.8	12210.3	12148.9	12156.7	12155.2	12148.9	12148.9	12196.2	-174.537
	170.7	61753.8	61880.5	61388.8	61388.8	61406.8	61401.4	61392.1	61846.5	-126.707			171.3	12220.9	12215.8	12149	12157.1	12155.5	12149	12149	12201.3	5.0791
	170.6	61865.3	61910.6	61404.5	61404.5	61423	61417.6	61407.9	61875.7	-45.3281			171.2	12259.3	12221.9	12148.9	12157.3	12155.6	12148.9	12148.9	12206.9	37.4307
	170.5	61925.8	61940.7	61420.3	61420.3	61439.3	61433.7	61423.8	61904.8	-14.9141			171.1	12262.9	12228.8	12148.8	12157.4	12155.6	12148.8	12148.8	12213.3	34.1553
	170.4	61728.4	61970.7	61436.1	61436.1	61455.7	61449.8	61439.7	61933.8	-242.309			171	12274.2	12236.6	12148.7	12157.6	12155.7	12148.7	12148.7	12220.7	37.6006
	170.3	61976.9	62000.5	61451.8	61451.8	61472	61465.9	61455.5	61962.6	-23.6328			170.9	12333.6	12245.5	12148.5	12157.7	12155.7	12148.5	12148.5	12229.2	88.0664
	170.2	62199.8	62030.1	61467.6	61467.6	61488.4	61482.1	61471.4	61991.1	169.676			170.8	12405.7	12255.6	12148.3	12157.8	12155.7	12148.3	12148.3	12238.7	150.101
	170.1	62178.6	62059.4	61483.4	61483.4	61504.8	61498.3	61487.2	62019.2	119.195			170.7	12040.9	12266.9	12148	12157.8	12155.6	12148	12148	12249.5	-225.991
	170	62160.9	62088.3	61499.2	61499.2	61521.2	61514.5	61503.1	62046.9	72.6133			170.6	12119.9	12280	12148.1	12158.3	12156	12148.1	12148.1	12262	-160.117
	169.9	62057.3	62116.7	61514.9	61514.9	61537.7	61530.7	61519	62074.1	-59.375			170.5	12318.3	12294.6	12148.2	12158.7	12156.2	12148.2	12148.2	12276	23.7402
	169.8	62248.6	62144.5	61530.7	61530.7	61554.2	61546.9	61534.8	62100.6	104.102			170.4	12310.2	12310.5	12148	12158.9	12156.3	12148	12148	12291.3	-0.255859
	169.7	62567.9	62171.7	61546.4	61546.4	61570.7	61563.2	61550.7	62126.4	396.238			170.3	12249.9	12328	12147.8	12159	12156.3	12147.8	12147.8	12308.2	-78.1064
	169.6	62057.6	62198.1	61562.2	61562.2	61587.3	61579.5	61566.6	62151.4	-140.469			170.2	12505.7	12347.3	12147.7	12159.4	12156.5	12147.7	12147.7	12326.8	158.387
	169.5	62248.8	62223.7	61578	61578	61603.9	61595.8	61582.5	62175.5	25.1484			170.1	12222.1	12368	12147.3	12159.4	12156.3	12147.3	12147.3	12346.8	-145.915
	169.4	62347	62248.3	61593.8	61593.8	61620.6	61612.1	61598.4	62198.6	98.6875			170	12429.2	12390.7	12147.2	12159.8	12156.5	12147.2	12147.2	12368.8	38.4766
	169.3	62046.2	62272	61609.5	61609.5	61637.3	61628.4	61614.3	62220.6	-225.785			169.9	12363.2	12414.8	12146.9	12159.9	12156.5	12146.9	12146.9	12392.1	-51.6103
	169.2	62280.1	62294.6	61625.3	61625.3	61654	61644.8	61630.2	62241.5	-14.5117			169.8	12299.8	12440.5	12146.6	12160.2	12156.6	12146.6	12146.6	12416.9	-140.69
	169.1	62091.3	62316.1	61641.1	61641.1	61670.8	61661.2	61646.1	62261.2	-224.844			169.7	12386.1	12467.6	12146.4	12160.6	12156.7	12146.5	12146.4	12443.1	-81.5264
	169	61999.5	62336.5	61656.8	61656.8	61687.7	61677.7	61662	62279.7	-337.031			169.6	12413.8	12495.9	12146.1	12160.9	12156.8	12146.2	12146.1	12470.4	-82.0498
	168.9	62112.8	62355.8	61672.6	61672.6	61704.6	61694.2	61677.9	62296.9	-242.953			169.5	12570.7	12525	12145.8	12161.2	12156.8	12145.9	12145.8	12498.6	45.7012
	168.8	62277.2	62373.8	61688.4	61688.4	61721.6	61710.7	61693.8	62312.8	-96.6055			169.4	12576.5	12554.6	12145.3	12161.4	12156.7	12145.5	12145.3	12527.1	21.8711
	168.7	62150.3	62390.7	61704.1	61704.1	61738.7	61727.2	61709.8	62327.5	-240.379			169.3	12575.6	12584.6	12144.9	12161.6	12156.6	12145	12144.9	12555.9	-8.96094
	168.6	62928.8	62406.4	61719.9	61719.9	61755.8	61743.8	61725.7	62340.8	522.387			169.2	12768.9	12614.4	12144.4	12161.8	12156.5	12144.6	12144.4	12584.5	154.491
	168.5	62715.7	62421	61735.7	61735.7	61773	61760.5	61741.6	62353	294.664			169.1	12848.8	12643.5	12143.6	12161.9	12156.3	12143.9	12143.6	12612.2	205.32
	168.4	62505	62434.6	61751.4	61751.4	61790.3	61777.1	61757.6	62363.9	70.3984			169	12700.9	12671.4	12142.8	12162	12155.9	12143.2	12142.8	12638.7	29.5068
	168.3	62397.2	62447.2	61767.2	61767.2	61807.7	61793.9	61773.6	62373.7	-49.9766			168.9	12649	12697.9	12142.2	12162.2	12155.8	12142.8	12142.2	12663.6	-48.8486
	168.2	62609.6	62458.8	61783	61783	61825.2	61810.7	61789.5	62382.4	150.758			168.8	12703.3	12722.1	12141.6	12162.7	12155.7	12142.4	12141.6	12686.1	-18.835
	168.1	62793.7	62469.7	61798.8	61798.8	61842.8	61827.5	61805.5	62390.1	324.016			168.7	12799.6	12743.5	12140.9	12163.1	12155.6	12142	12140.9	12705.6	56.0693
	168	62666.4	62479.8	61814.5	61814.5	61860.6	61844.4	61821.5	62396.8	186.598			168.6	12789.7	12761.4	12140.2	12163.5	12155.4	12141.6	12140.2	12721.4	28.3047
	167.9	62353.7	62489.3	61830.3	61830.3	61878.5	61861.4	61837.5	62402.8	-135.594			168.5	12741.7	12775.3	12139.4	12164	12155.3	12141.3	12139.4	12733	-33.6445
	167.8	62342.6	62498.3	61846.1	61846.1	61896.5	61878.5	61853.5	62408	-155.684			168.4	12636	12785	12138.7	12164.6	12155.3	12141.2	12138.7	12740.1	-149.016
	167.7	62499.7	62506.9	61861.8	61861.8	61914.7	61895.6	61869.6	62412.5	-7.17578			168.3	12795.5	12790.2	12138.1	12165.5	12155.4	12141.4	12138.1	12742.4	5.26953
	167.6	62699.3	62515.2	61877.6	61877.6	61933.1	61912.8	61885.6	62416.5	184.094			168.2	12952	12790.6	12137.4	12166.4	12155.4	12141.6	12137.4	12739.5	161.366
	167.5	62511.3	62523.4	61893.4	61893.4	61951.6	61930.2	61901.7	62420	-12.082			168.1	12919.6	12786.4	12136.4	12167.1	12155.2	12141.8	12136.4	12731.4	133.225
	167.4	62723.6	62531.6	61909.1	61909.3	61970.4	61947.6	61917.7	62423.1	192.039			168	12727.1	12778	12135.5	12168.1	12155.2	12142.5	12135.5	12718.8	-50.9248
	167.3	62898.2	62539.9	61924.9	61925.2	61989.4	61965.2	61933.8	62425.9	358.316			167.9	12677.3	12766.3	12134.8	12169.5	12155.4	12143.7	12134.8	12702.1	-88.9814
	167.2	62744.4	62548.5	61940.7	61941.2	62008.7	61982.9	61949.9	62428.5	195.867			167.8	12756.8	12751.6	12134.2	12171.2	12155.8	12145.5	12134.2	12681.9	5.16797
	167.1	62491.6	62557.8	61956.4	61957.5	62028.2	62000.8	61966.1	62430.9	-66.1445			167.7	12720	12734.6	12133.5	12173	12156.1	12147.7	12133.5	12658.4	-14.6494
	167	62517.1	62567.8	61972.2	61974.2	62048.1	62018.8	61982.2	62433.3	-50.7461			167.6	12619.3	12716.2	12132.8	12175.1	12156.5	12150.6	12132.8	12632.5	-96.9492
	166.9	62385.6	62579.3	61988	61991.7	62068.4	62037	61998.4	62435.6	-193.688			167.5	12600.9	12697.3	12132.2	12177.6	12157.2	12154.4	12132.2	12604.9	-96.3799
	166.8	62728.9	62592.7	62003.7	62010.5	62089.1	62055.5	62014.6	62438	136.176			167.4	12606.6	12678.4	12131.7	12180.5	12158	12159.1	12131.7	12576	-71.8262
	166.7	62506.4	62609.1	62019.5	62031.4	62110.2	62074.3	62030.8	62440.4	-102.719			167.3	12723.6	12660.4	12131.2	12183.7	12158.8	12164.9	12131.2	12546.4	63.1943
	166.6	62290.1	62629.8	62035.3	62055.7	62131.8	62093.4	62047.1	62443	-339.734			167.2	12569.9	12643.8	12130.5	12187.3	12159.7	12171.8	12130.5	12516.4	-73.8975
	166.5	62484.4	62656.8	62051.1	62085	62154	62112.9	62063.4	62445.7	-172.391			167.1	12473.8	12629.6	12130	12191.6	12160.8	12180.2	12130	12486.8	-155.809
	166.4	62495.6	62692.5	62066.8	62121.8	62176.9	62132.8	62079.7	62448.7	-196.93			167	12603.4	12618.4	12129.6	12196.7	12162.2	12190.4	12129.6	12457.9	-15.0166
	166.3	62608.9	62740.4	62082.6	62169.1	62200.5	62153.2	62096	62451.8	-131.469			166.9	12585.9	12610.6	12129	12202.3	12163.6	12202.1	12129	12429.6	-24.6846
	166.2	62981.9	62804.4	62098.4	62230.9	62225	62174.3	62112.4	62455.2	177.519			166.8	12789.3	12606.9	12128.5	12208.8	12165.2	12215.8	12128.5	12402.5	182.409
	166.1	62643.3	62889.2	62114.1	62311.5	62250.4	62196.1	62128.9	62458.8	-245.949			166.7	12712	12607.7	12127.7	12216.2	12166.8	12231.4	12127.7	12376.5	104.335
	166	62776.3	63000.1	62129.9	62415.8	62277.1	62218.7	62145.4	62462.8	-223.809			166.6	12575.9	12613.8	12127	12224.9	12168.7	12249.4	12127	12351.9	-37.9141
	165.9	62949.2	63141.9	62145.7	62548.5	62305	62242.2	62161.9	62467	-192.742			166.5	12703.1	12626	12126.5	12235.3	12171	12270.1	12126.5	12329.1	77.0928
	165.8	63067.4	63319	62161.4	62713.3	62334.4	62266.9	62178.5	62471.5	-251.566			166.4	12774	12644.6	12125.9	12247.5	12173.5	12293.3	12125.9	12307.8	129.42
	165.7	63581.1	63533.9	62177.2	62912.6	62365.8	62292.8	62195.2	62476.3	47.1953			166.3	12845.9	12670.3	12125.1	12262.2	12176.2	12319.2	12125.1	12288.1	175.566
	165.6	63945.1	63787	62193	63145.9	62399.3	62320.2	62212	62481.5	158.144			166.2	12852	12704.2	12124.3	12280	12179.2	12347.9	12124.3	12269.9	147.767
	165.5	64113.6	64075.3	62208.7	63409.7	62435.6	62349.2	62228.8	62487	38.3359			166.1	12674.8	12747.7	12123.4	12302.4	12182.7	12379.6	12123.4	12253.4	-72.8984
	165.4	64602.6	64392.3	62224.5	63696.5	62475.3	62380	62245.7	62492.8	210.324			166	12775.6	12803	12122.8	12331.6	12186.9	12414.4	12122.8	12238.6	-27.4385
	165.3	64915.5	64727.9	62240.3	63995	62519.5	62412.8	62262.8	62498.9	187.629			165.9	12856.4	12873.2	12122	12370.5	12191.5	12452	12122	12225.2	-16.7764
	165.2	65337.8	65069.2	62256	64290.4	62570	62447.7	62280	62505.4	268.566			165.8	12990.8	12963.1	12121.2	12424.3	12196.9	12492.4	12121.2	12213.1	27.709
	165.1	65599.6	65401.9	62271.8	64565.5	62629.2	62485	62297.4	62512.1	197.66			165.7	13010.1	13079.9	12120.2	12500.1	12203	12535.2	12120.2	12202.1	-69.8125
	165	65699.2	65712.4	62287.6	64802.8	62700.9	62524.7	62315	62519.2	-13.1641			165.6	13139.1	13233.2	12119.1	12607.6	12210.3	12580.4	12119.2	12192.3	-94.1123
	164.9	65650.1	65989.8	62303.3	64985.8	62790.8	62567	62333	62526.6	-339.695			165.5	13417.5	13434.1	12118	12757.8	12219.3	12627.5	12118	12183.5	-16.6172
	164.8	66055.6	66229	62319.1	65101.3	62906.3	62612	62351.5	62534.3	-173.414			165.4	13751.9	13693.8	12116.5	12961.3	12230.6	12676	12116.5	12175.3	58.123
	164.7	66306.8	66432.3	62334.9	65141.4	63057.8	62659.7	62370.6	62542.3	-125.484			165.3	13874.8	14020.9	12114.6	13226	12245.8	12725.2	12114.6	12167.6	-146.1
	164.6	66768.8	66610	62350.7	65104	63257.2	62710.1	62390.8	62550.6	158.773			165.2	14431.6	14418.3	12112.5	13552.5	12267.7	12775.1	12112.7	12160.5	13.3184
	164.5	66890.7	66780.5	62366.4	64993.4	63518.3	62763	62412.2	62559.2	110.234			165.1	15101.9	14875.5	12109.9	13926.8	12300.1	12824.3	12110.2	12153.4	226.403
	164.4	66831.4	66967.3	62382.2	64819.8	63854.1	62818.3	62435.7	62568.1	-135.883			165	15411.1	15361	12106.4	14311.4	12349.6	12872.2	12107.1	12146.2	50.0859
	164.3	67127.3	67195.8	62398	64597.8	64274.9	62875.7	62461.9	62577.2	-68.4688			164.9	15558.8	15811.9	12102.6	14634.3	12426.1	12918.6	12104.1	12139.1	-253.128
	164.2	67463.3	67488.1	62413.7	64344.5	64785.2	62934.8	62491.9	62586.7	-24.8125			164.8	15979	16143.9	12098.6	14798.7	12542.9	12962.8	12101.5	12132.2	-164.878
	164.1	67912.2	67857.3	62429.5	64077.6	65379.4	62994.9	62527	62596.3	54.8672			164.7	16534.3	16306.6	12094.1	14738.4	12715.8	13003.9	12099.5	12125.3	227.728
	164	68424.4	68301.6	62445.3	63813.5	66038.4	63055.5	62568.9	62606.3	122.852			164.6	16377.6	16341.1	12088.9	14476.3	12962.7	13041	12098.9	12118	36.4736
	163.9	68771.7	68796.4	62461	63565.7	66723.3	63115.4	62619.7	62616.4	-24.7031			164.5	16445.6	16356.6	12084	14103.6	13302	13074.2	12101.6	12111.1	88.9453
	163.8	69416.2	69288.2	62476.8	63344.2	67369.2	63173.6	62681.6	62626.9	127.984			164.4	16469.6	16455.9	12078.9	13709.1	13746.2	13102.7	12109.1	12104.4	13.7344
	163.7	69467	69693.1	62492.6	63155	67885	63228.8	62757.2	62637.5	-226.141			164.3	16540.2	16698.8	12073.8	13347.5	14298.9	13125.9	12123.9	12097.9	-158.578
	163.6	69910.5	69914.4	62508.3	63000.3	68170.6	63279.4	62849.2	62648.4	-3.91406			164.2	17109.4	17101.8	12068.7	13043.1	14949.4	13143.4	12149.2	12091.4	7.57617
	163.5	69641.5	69885.9	62524.1	62879.5	68159.4	63323.8	62960.2	62659.4	-244.453			164.1	17630.5	17645.1	12062.8	12801.1	15668.6	13154	12188.2	12084.4	-14.6328
	163.4	69670.1	69612.7	62539.9	62789.5	67858.6	63360.8	63092.6	62670.7	57.3906			164	18319.3	18280.7	12056.4	12616.9	16409.1	13157.7	12245.6	12076.9	38.6055
	163.3	69423.2	69167	62555.7	62726.2	67344.2	63389	63248.1	62682.2	256.227			163.9	18944.1	18936.9	12049.1	12480.5	17104.2	13154	12326	12068.7	7.20508
	163.2	68683.7	68644.8	62571.4	62684.7	66717	63407.7	63427.2	62693.8	38.8594			163.8	19672.9	19527	12041.1	12380.6	17674.5	13142.9	12433.7	12059.8	145.93
	163.1	68201.9	68128.2	62587.2	62660.4	66064.4	63416.8	63629.6	62705.7	73.7266			163.7	19919.3	19961.8	12032.3	12306.8	18038.1	13124.3	12571.7	12050.2	-42.5039
	163	67786.6	67670.7	62602.9	62649	65446.1	63416.6	63853.1	62717.7	115.945			163.6	20134.8	20171.6	12023.2	12251	18132.7	13099.1	12741.3	12040.3	-36.8438
	162.9	67173	67300.9	62618.7	62646.9	64897.1	63408.2	64093.8	62729.8	-127.883			163.5	20045.4	20129.3	12013.8	12207.1	17939.1	13067.4	12940.5	12030.2	-83.9316
	162.8	67022.1	67028.1	62634.5	62651.2	64434.1	63392.7	64345.9	62742.2	-6.00781			163.4	19792.1	19858.8	12004.5	12171.5	17491.3	13030.1	13163.5	12020.3	-66.7168
	162.7	66674.3	66847.4	62650.3	62659.9	64060.2	63371.7	64602	62754.6	-173.109			163.3	19637.6	19418.8	11995.5	12141.7	16860.3	12987.9	13400.1	12010.7	218.772
	162.6	66619.1	66744.1	62666	62671.5	63769.9	63346.7	64852.8	62767.3	-124.992			163.2	18771	18877.1	11986.6	12115.9	16128.8	12941.1	13636.5	12001.3	-106.072
	162.5	66384.5	66697.1	62681.8	62684.8	63552.1	63319.2	65088.1	62780	-312.602			163.1	18260	18294.2	11978.8	12094	15374.4	12891.2	13856.8	11992.9	-34.1875
	162.4	66725.9	66682.6	62697.6	62699.2	63393.6	63290.5	65296.8	62792.9	43.2734			163	17704.6	17713.4	11971.5	12074.8	14657.6	12838.6	14043.3	11985.1	-8.77148
	162.3	66960.4	66676.9	62713.3	62714.2	63280.8	63261.5	65467.9	62805.9	283.461			162.9	17261.8	17161.2	11964.9	12058	14021	12783.9	14179.8	11978	100.629
	162.2	67009.7	66658.9	62729.1	62729.5	63201.9	63233.2	65591.6	62819.1	350.781			162.8	16529.4	16648.4	11958.7	12043.1	13487.5	12727.7	14253.6	11971.4	-118.99
	162.1	66757.3	66612	62744.9	62745.1	63147.3	63206.3	65660.6	62832.3	145.281			162.7	16106.4	16174.5	11953.4	12030.2	13063.6	12671.1	14257.7	11965.7	-68.1348
	162	66674.1	66525.4	62760.6	62760.7	63109.6	63181.2	65670.8	62845.7	148.664			162.6	15761.2	15732.3	11948.6	12018.8	12742.3	12614.3	14190.9	11960.5	28.875
	161.9	66333.9	66394.7	62776.4	62776.4	63083.7	63158.3	65622.7	62859.1	-60.7891			162.5	15422.1	15313.1	11944.2	12008.6	12508.8	12558	14058.8	11955.7	109.009
	161.8	66010.2	66221.1	62792.2	62792.2	63066	63137.9	65521.1	62872.7	-210.93			162.4	14985.5	14910.8	11940.2	11999.4	12345.2	12502.8	13872.8	11951.3	74.707
	161.7	65864.6	66010.4	62807.9	62807.9	63054.2	63120.1	65373.7	62886.3	-145.852			162.3	14594	14523.7	11936.7	11991.4	12233.9	12449.2	13648.4	11947.4	70.2881
	161.6	65343	65771.4	62823.7	62823.7	63046.7	63105	65190.7	62900	-428.352			162.2	14012.6	14154	11933.6	11984.2	12159.5	12397.7	13402.9	11944	-141.407
	161.5	65413.4	65513.8	62839.5	62839.5	63042.5	63092.6	64983.3	62913.8	-100.356			162.1	13744.2	13807.3	11931.2	11978.2	12110	12349	13153.5	11941.3	-63.0664
	161.4	65443.4	65247.9	62855.2	62855.2	63040.9	63082.8	64762.2	62927.7	195.461			162	13351.2	13489.3	11929.1	11972.9	12076.5	12302.9	12914.5	11938.9	-138.12
	161.3	64886.3	64983.5	62871	62871	63041.5	63075.6	64537.8	62941.7	-97.2188			161.9	13266.6	13205.9	11927.4	11968.3	12053.2	12259.9	12697.3	11937	60.6738
	161.2	64686.2	64728.8	62886.8	62886.8	63043.9	63070.8	64318.8	62955.7	-42.5898			161.8	13108.2	12960.3	11925.9	11964.1	12036	12219.7	12508.9	11935.1	147.881
	161.1	64807.9	64490.6	62902.6	62902.6	63047.7	63068.2	64112.5	62969.8	317.293			161.7	12904.4	12753.5	11924.5	11960.4	12022.7	12182.7	12352.3	11933.5	150.897
	161	64554.4	64273.9	62918.3	62918.3	63052.9	63067.8	63924.2	62984	280.5			161.6	12538.8	12584.1	11923.4	11957	12012	12148.9	12227.6	11932.1	-45.3291
	160.9	64491.4	64081.9	62934.1	62934.1	63059.1	63069.2	63757.6	62998.2	409.508			161.5	12422.3	12448.9	11922.7	11954.3	12003.3	12118.5	12132.3	11931.1	-26.6172
	160.8	64047.6	63916.1	62949.9	62949.9	63066.3	63072.4	63614.4	63012.5	131.523			161.4	12291.2	12343	11922.1	11952	11995.9	12091	12062.1	11930.3	-51.7949
	160.7	63558.8	63776.4	62965.6	62965.6	63074.4	63077.2	63494.9	63026.8	-217.59			161.3	12209.6	12261.3	11921.7	11949.9	11989.5	12066.6	12012.3	11929.7	-51.71
	160.6	63357	63661.7	62981.4	62981.4	63083.2	63083.3	63398.2	63041.2	-304.656			161.2	12232.3	12198.8	11921.3	11948	11984	12044.9	11978.2	11929.1	33.4609
	160.5	63469.4	63569.8	62997.2	62997.2	63092.6	63090.6	63322.4	63055.7	-100.348			161.1	12079.4	12151.1	11921	11946.2	11978.9	12025.7	11955.5	11928.5	-71.6689
	160.4	63337	63498.1	63012.9	63012.9	63102.6	63098.9	63265.2	63070.2	-161.078			161	12040.7	12114.5	11920.8	11944.7	11974.6	12009	11941.1	11928.2	-73.8135
	160.3	63468.3	63443.8	63028.7	63028.7	63113.1	63108.2	63223.9	63084.7	24.5039			160.9	11957.9	12086.2	11920.6	11943.4	11970.7	11994.5	11932.3	11927.8	-128.258
	160.2	63191.9	63404	63044.5	63044.5	63124.1	63118.3	63195.8	63099.3	-212.098			160.8	11920.2	12063.9	11920.6	11942.2	11967.3	11982.1	11927	11927.6	-143.675
	160.1	63328.1	63376	63060.2	63060.2	63135.4	63129	63178.4	63113.9	-47.9023			160.7	12014.3	12046	11920.6	11941.2	11964.3	11971.5	11924	11927.4	-31.7217
	160	63222.4	63357.4	63076	63076	63147.1	63140.3	63169.4	63128.5	-134.984			160.6	12026.4	12031.3	11920.5	11940.1	11961.4	11962.3	11922.3	11927.2	-4.93164
	159.9	63099	63346.1	63091.8	63091.8	63159.2	63152.1	63166.9	63143.2	-247.07			160.5	12062	12019.1	11920.4	11939.1	11958.8	11954.6	11921.3	11926.9	42.8877
	159.8	63285.9	63340.4	63107.6	63107.6	63171.5	63164.3	63169.3	63157.9	-54.4609			160.4	12082	12008.8	11920.2	11938.1	11956.3	11948	11920.6	11926.5	73.2051
	159.7	63608.7	63338.9	63123.3	63123.3	63184	63176.9	63175.2	63172.7	269.832			160.3	11971.1	12000	11920	11937.1	11954.1	11942.5	11920.2	11926.2	-28.9092
	159.6	63445.5	63340.5	63139.1	63139.1	63196.8	63189.8	63183.7	63187.5	104.973			160.2	12089.1	11992.6	11920	11936.3	11952.1	11938	11920.1	11926	96.4844
	159.5	63285.1	63344.5	63154.9	63154.9	63209.8	63202.9	63194	63202.3	-59.4258			160.1	12086.9	11986.1	11919.8	11935.5	11950.1	11934.1	11919.8	11925.7	100.759
	159.4	63484.8	63350.3	63170.6	63170.6	63223	63216.3	63205.7	63217.1	134.531			160	12003.5	11980.5	11919.6	11934.6	11948.3	11931	11919.6	11925.3	22.9492
	159.3	63901	63357.3	63186.4	63186.4	63236.4	63229.9	63218.2	63232	543.684			159.9	11829	11975.8	11919.5	11933.9	11946.7	11928.5	11919.5	11925.1	-146.796
	159.2	63722.6	63365.4	63202.2	63202.2	63249.9	63243.6	63231.4	63246.9	357.246			159.8	11881.3	11971.9	11919.6	11933.5	11945.5	11926.6	11919.6	11925.1	-90.5732
	159.1	63396.5	63374.2	63217.9	63217.9	63263.6	63257.5	63245	63261.8	22.3398			159.7	11902	11968.4	11919.6	11933	11944.2	11925.1	11919.6	11925	-66.418
	159	63233.7	63383.6	63233.7	63233.7	63277.4	63271.5	63259	63276.8	-149.883			159.6	11889.3	11965.4	11919.6	11932.5	11943.1	11923.9	11919.6	11924.9	-76.0879
	158.9	63641.4											159.5	11839.1	11962.8	11919.7	11932	11942	11923	11919.7	11924.8	-123.645
	158.8	63666.2											159.4	11969.6	11960.5	11919.8	11931.7	11941.1	11922.3	11919.8	11924.8	9.12207
	158.7	63731.5											159.3	12020.3	11958.3	11919.7	11931.2	11940	11921.6	11919.7	11924.6	61.9736
	158.6	63557.4											159.2	11919.6	11956.3	11919.6	11930.7	11939	11921	11919.6	11924.4	-36.7383
	158.5	63687											159.1	12013.4
	158.4	63591.4											159	11914
	158.3	63853.3											158.9	11913.5
	158.2	63687.1											158.8	11928.2
	158.1	63491.8											158.7	12010.5
	158	63765.2											158.6	12003.2
	157.9	63723.5											158.5	12021.6
	157.8	63529.3											158.4	11993
	157.7	63620											158.3	12185.6
	157.6	63902											158.2	12102.3
	157.5	64252.1											158.1	11969.9
	157.4	64239.1											158	11915.8
	157.3	64224.5											157.9	12142.8
	157.2	64137.3											157.8	12154.7
	157.1	64389.2											157.7	11980.8
	157	64196.6											157.6	11865.2
	156.9	63963											157.5	11999.2
	156.8	64080.7											157.4	11985.4

## Sheet: Figure 2i
	AV	AI			AV	AI			AV	AI				AV	AI				AV	AI				AV	AI
Plane struc.	-0.3	-0.00414759		Floating-struc. w/o SAMs	-0.3	-0.0953036		Floating-struc. w/1,8-Octanedithiol	-0.3	-0.0822395			Floating-struc. w/1,10-Decanedithiol	-0.3	-0.0863793			Floating-struc. w/1,4-Benzenedthiol	-0.3	-0.0664885			Floating-struc. w/Biphenyl-4,4'-dithiol	-0.3	-0.0749018
	-0.29	-0.00400926			-0.29	-0.0921909			-0.29	-0.0795025				-0.29	-0.083505				-0.29	-0.0642795				-0.29	-0.0724454
	-0.28	-0.00387501			-0.28	-0.0890635			-0.28	-0.0767642				-0.28	-0.080632				-0.28	-0.0620698				-0.28	-0.0699772
	-0.27	-0.00373662			-0.27	-0.0859278			-0.27	-0.0740258				-0.27	-0.0777564				-0.27	-0.0598589				-0.27	-0.0675006
	-0.26	-0.00359821			-0.26	-0.0827795			-0.26	-0.0712865				-0.26	-0.0748796				-0.26	-0.0576468				-0.26	-0.0650185
	-0.25	-0.00345975			-0.25	-0.0796324			-0.25	-0.0685465				-0.25	-0.0720022				-0.25	-0.0554334				-0.25	-0.0625339
	-0.24	-0.00332128			-0.24	-0.0764771			-0.24	-0.0658063				-0.24	-0.0691241				-0.24	-0.053219				-0.24	-0.0600457
	-0.23	-0.00318289			-0.23	-0.0733204			-0.23	-0.063067				-0.23	-0.0662475				-0.23	-0.051005				-0.23	-0.057557
	-0.22	-0.00304445			-0.22	-0.0701569			-0.22	-0.0603264				-0.22	-0.063369				-0.22	-0.0487901				-0.22	-0.0550646
	-0.21	-0.00290599			-0.21	-0.066989			-0.21	-0.0575853				-0.21	-0.0604892				-0.21	-0.0465738				-0.21	-0.0525698
	-0.2	-0.00276754			-0.2	-0.0638185			-0.2	-0.0548435				-0.2	-0.0576101				-0.2	-0.0443573				-0.2	-0.0500731
	-0.19	-0.00262921			-0.19	-0.0606481			-0.19	-0.0521048				-0.19	-0.0547336				-0.19	-0.0421431				-0.19	-0.0475774
	-0.18	-0.00249073			-0.18	-0.0574708			-0.18	-0.0493617				-0.18	-0.051854				-0.18	-0.0399257				-0.18	-0.0450766
	-0.17	-0.00235185			-0.17	-0.0542814			-0.17	-0.0466107				-0.17	-0.0489654				-0.17	-0.037701				-0.17	-0.042567
	-0.16	-0.00221343			-0.16	-0.0510993			-0.16	-0.0438692				-0.16	-0.0460856				-0.16	-0.0354836				-0.16	-0.0400655
	-0.15	-0.00207492			-0.15	-0.0479149			-0.15	-0.0411261				-0.15	-0.0432047				-0.15	-0.0332652				-0.15	-0.0375622
	-0.14	-0.00193648			-0.14	-0.0447282			-0.14	-0.0383838				-0.14	-0.0403235				-0.14	-0.031047				-0.14	-0.0350588
	-0.13	-0.00179801			-0.13	-0.0415393			-0.13	-0.0356401				-0.13	-0.0374418				-0.13	-0.028828				-0.13	-0.0325544
	-0.12	-0.00165966			-0.12	-0.0383514			-0.12	-0.0328998				-0.12	-0.0345631				-0.12	-0.0266108				-0.12	-0.0300512
	-0.11	-0.00152134			-0.11	-0.0351622			-0.11	-0.0301595				-0.11	-0.0316838				-0.11	-0.0243937				-0.11	-0.0275482
	-0.1	-0.00138298			-0.1	-0.0319697			-0.1	-0.0274177				-0.1	-0.0288035				-0.1	-0.0221759				-0.1	-0.0250436
	-0.09	-0.00124466			-0.09	-0.0287763			-0.09	-0.0246764				-0.09	-0.025923				-0.09	-0.0199581				-0.09	-0.0225393
	-0.08	-0.00110631			-0.08	-0.0255816			-0.08	-0.0219347				-0.08	-0.0230425				-0.08	-0.0177402				-0.08	-0.0200347
	-0.07	-0.000967951			-0.07	-0.0223854			-0.07	-0.0191929				-0.07	-0.0201625				-0.07	-0.0155215				-0.07	-0.0175295
	-0.06	-0.000829681			-0.06	-0.0191895			-0.06	-0.0164525				-0.06	-0.0172832				-0.06	-0.0133048				-0.06	-0.0150256
	-0.05	-0.000691351			-0.05	-0.0159911			-0.05	-0.0137098				-0.05	-0.0144032				-0.05	-0.0110868				-0.05	-0.0125208
	-0.04	-0.000553019			-0.04	-0.0127922			-0.04	-0.0109682				-0.04	-0.0115221				-0.04	-0.00886805				-0.04	-0.0100151
	-0.03	-0.000414631			-0.03	-0.00959146			-0.03	-0.00822476				-0.03	-0.00864077				-0.03	-0.00664868				-0.03	-0.00750868
	-0.02	-0.000276776			-0.02	-0.00639253			-0.02	-0.00548307				-0.02	-0.00576034				-0.02	-0.00443054				-0.02	-0.00500413
	-0.01	-0.000137915			-0.01	-0.00318476			-0.01	-0.0027351				-0.01	-0.00287332				-0.01	-0.00220701				-0.01	-0.00249288
	0	5.53721e-08			0	-6.64684e-06			0	5.41645e-07				0	5.57763e-07				0	1.32254e-07				0	1.04127e-07
	0.01	0.000138487			0.01	0.00321075			0.01	0.00274794				0.01	0.00288611				0.01	0.00222649				0.01	0.00251239
	0.02	0.000276941			0.02	0.00641353			0.02	0.00549446				0.02	0.00577124				0.02	0.00444687				0.02	0.00501921
	0.03	0.000415281			0.03	0.00961285			0.03	0.00823671				0.03	0.0086521				0.03	0.00666624				0.03	0.00752197
	0.04	0.00055395			0.04	0.0128131			0.04	0.0109805				0.04	0.0115345				0.04	0.00888499				0.04	0.0100263
	0.05	0.00069233			0.05	0.0160124			0.05	0.0137239				0.05	0.014416				0.05	0.0111046				0.05	0.0125295
	0.06	0.000830677			0.06	0.0192092			0.06	0.0164668				0.06	0.0172975				0.06	0.0133224				0.06	0.0150318
	0.07	0.000968928			0.07	0.0224038			0.07	0.0192079				0.07	0.0201768				0.07	0.0155393				0.07	0.0175321
	0.08	0.00110727			0.08	0.0255997			0.08	0.0219515				0.08	0.0230586				0.08	0.0177582				0.08	0.0200336
	0.09	0.00124564			0.09	0.0287937			0.09	0.0246939				0.09	0.0259399				0.09	0.0199767				0.09	0.0225342
	0.1	0.00138397			0.1	0.0319855			0.1	0.0274366				0.1	0.0288214				0.1	0.022194				0.1	0.0250336
	0.11	0.00152234			0.11	0.0351765			0.11	0.0301797				0.11	0.0317034				0.11	0.0244123				0.11	0.0275327
	0.12	0.00166114			0.12	0.0383742			0.12	0.0329315				0.12	0.0345933				0.12	0.0266373				0.12	0.0300388
	0.13	0.00179946			0.13	0.0415617			0.13	0.0356735				0.13	0.0374744				0.13	0.0288535				0.13	0.0325356
	0.14	0.00193797			0.14	0.0447492			0.14	0.038418				0.14	0.0403575				0.14	0.0310727				0.14	0.0350331
	0.15	0.00207643			0.15	0.047934			0.15	0.0411622				0.15	0.0432403				0.15	0.0332906				0.15	0.0375298
	0.16	0.00221493			0.16	0.0511164			0.16	0.043907				0.16	0.0461235				0.16	0.0355096				0.16	0.0400254
	0.17	0.00235338			0.17	0.0542948			0.17	0.0466513				0.17	0.0490062				0.17	0.0377269				0.17	0.0425186
	0.18	0.00249184			0.18	0.0574705			0.18	0.049395				0.18	0.0518877				0.18	0.039944				0.18	0.0450107
	0.19	0.00263033			0.19	0.0606455			0.19	0.0521393				0.19	0.0547703				0.19	0.0421619				0.19	0.0475024
	0.2	0.00276867			0.2	0.0638124			0.2	0.0548799				0.2	0.0576494				0.2	0.0443766				0.2	0.0499888
	0.21	0.00290712			0.21	0.0669763			0.21	0.0576227				0.21	0.0605304				0.21	0.0465928				0.21	0.0524759
	0.22	0.0030456			0.22	0.0701382			0.22	0.0603657				0.22	0.0634124				0.22	0.0488095				0.22	0.0549621
	0.23	0.00318405			0.23	0.0732964			0.23	0.063109				0.23	0.066294				0.23	0.0510254				0.23	0.057446
	0.24	0.00332246			0.24	0.0764501			0.24	0.0658505				0.24	0.0691739				0.24	0.0532398				0.24	0.059927
	0.25	0.00346094			0.25	0.0795993			0.25	0.0685922				0.25	0.072054				0.25	0.055455				0.25	0.0624074
	0.26	0.00359941			0.26	0.0827452			0.26	0.0713345				0.26	0.0749349				0.26	0.0576694				0.26	0.0648853
	0.27	0.00373782			0.27	0.0858854			0.27	0.0740744				0.27	0.0778137				0.27	0.0598823				0.27	0.0673598
	0.28	0.00387668			0.28	0.0890302			0.28	0.0768236				0.28	0.0807017				0.28	0.0621022				0.28	0.069841
	0.29	0.00401505			0.29	0.0921575			0.29	0.0795629				0.29	0.0835791				0.29	0.0643136				0.29	0.0723114
	0.3	0.00415337			0.3	0.0952774			0.3	0.0823008				0.3	0.0864547				0.3	0.0665239				0.3	0.0747794

## Sheet: Figure 2j&2k
		Time (s)	Resistance (Ω)				Time (s)	Resistance (Ω)			Time (s)	Resistance (Ω)				Time (s)	Resistance (Ω)			Time (s)	Resistance (Ω)			Time (s)	Resistance (Ω)
	Plane struc.	0.0407061	68.2253			Floating-struc. w/o SAMs	0.0990801	3.12455		Floating-struc. w/1,8-Octanedithiol	3.01446	3.5937			Floating-struc. w/1,10-Decanedithiol	0.0990801	3.38461		Floating-struc. w/1,4-Benzenedthiol	2.01752	4.32856		Floating-struc. w/Biphenyl-4,4'-dithiol	2.01752	3.82739
		1.10164	68.2252				1.16064	3.12462			5.03691	3.59358				1.16064	3.38469			3.04319	4.32848			3.04319	3.82741
		2.16206	68.2251				2.22115	3.12458			7.05969	3.59369				2.22115	3.38471			4.06918	4.3285			4.06918	3.82744
		3.22229	68.2253				3.33998	3.12459			9.08245	3.59378				3.33998	3.38464			5.09516	4.32852			5.09516	3.82738
		4.28323	68.2248				4.40149	3.12458			11.1052	3.59374				4.40149	3.38481			6.12117	4.32855			6.12117	3.82733
		5.3916	68.2249				5.46286	3.12456			13.128	3.5938				5.46286	3.38469			7.14717	4.32852			7.14717	3.82737
		6.45155	68.2246				6.52408	3.12462			15.1508	3.59375				6.52408	3.38471			8.17318	4.32852			8.17318	3.82733
		7.51175	68.2243				7.58459	3.12453			17.1735	3.59384				7.58459	3.38457			9.19918	4.32843			9.19918	3.8273
		8.57275	68.224				8.64506	3.12458			19.1963	3.59382				8.64506	3.38464			10.2252	4.32847			10.2252	3.82733
		9.63356	68.2241				9.70656	3.12453			21.2191	3.59377				9.70656	3.38473			11.2512	4.32844			11.2512	3.82737
		10.6941	68.2238				10.7686	3.1246			23.2419	3.59373				10.7686	3.38469			12.2772	4.32845			12.2772	3.82733
		11.7542	68.2237				11.8308	3.12457			25.2647	3.59369				11.8308	3.38471			13.3031	4.32845			13.3031	3.82728
		12.8146	68.2233				12.891	3.12466			27.2874	3.59371				12.891	3.38461			14.3291	4.32847			14.3291	3.82732
		13.8747	68.2231				13.9523	3.12456			29.3102	3.59366				13.9523	3.3848			15.3551	4.32845			15.3551	3.82732
		14.9356	68.2229				15.0134	3.12455			31.333	3.5936				15.0134	3.38464			16.3811	4.32852			16.3811	3.82735
		15.9968	68.2229				16.0747	3.1246			33.3558	3.59358				16.0747	3.38473			17.407	4.32847			17.407	3.82729
		17.0572	68.2227				17.1372	3.12455			35.3786	3.59348				17.1372	3.38471			18.433	4.32851			18.433	3.82721
		18.1183	68.2227				18.1982	3.12458			37.4013	3.59351				18.1982	3.38464			19.459	4.32852			19.459	3.82727
		19.1794	68.2226				19.2597	3.12456			39.4241	3.59355				19.2597	3.38464			20.485	4.32845			20.485	3.82728
		20.2402	68.2223				20.3202	3.12462			41.4469	3.59359				20.3202	3.38464			21.5109	4.32853			21.5109	3.8273
		21.3011	68.2223				21.3822	3.1246			43.4697	3.59363				21.3822	3.38476			22.5369	4.32847			22.5369	3.82729
		22.3618	68.2221				22.4435	3.12455			45.4924	3.59367				22.4435	3.38471			23.5629	4.32844			23.5629	3.82726
		23.422	68.2221				23.5039	3.1246			47.5153	3.59372				23.5039	3.38471			24.5889	4.32845			24.5889	3.82737
		24.4829	68.2221				24.5645	3.12456			49.538	3.5938				24.5645	3.38471			25.6149	4.32849			25.6149	3.82736
		25.5435	68.2219				25.6265	3.12456			51.5608	3.59374				25.6265	3.38454			26.6409	4.32844			26.6409	3.82737
		26.6041	68.2217				26.6873	3.12455			53.5836	3.59385				26.6873	3.38473			27.6669	4.32848			27.6669	3.82734
		27.6645	68.2215				27.7985	3.12455			55.6063	3.5939				27.7985	3.38461			28.6929	4.32846			28.6929	3.82738
		28.7256	68.2214				28.8598	3.12453			57.6291	3.59389				28.8598	3.38464			29.7189	4.32848			29.7189	3.82742
		29.7859	68.2214				29.9209	3.1246			59.6519	3.59395				29.9209	3.38469			30.7448	4.32848			30.7448	3.82734
		30.8459	68.2214				30.9816	3.12457			61.6747	3.59411				30.9816	3.38459			31.7708	4.3285			31.7708	3.82737
		31.9068	68.2213				32.0424	3.12456			63.6975	3.5941				32.0424	3.38468			32.7968	4.3285			32.7968	3.82738
		32.9677	68.2212				33.1036	3.12455			65.7203	3.59426				33.1036	3.38444			33.8228	4.32849			33.8228	3.82731
		34.0277	68.2214				34.165	3.1246			67.743	3.59425				34.165	3.38456			34.8487	4.32848			34.8487	3.82735
		35.0878	68.2211				35.2272	3.12465			69.7658	3.59445				35.2272	3.38463			35.8747	4.32848			35.8747	3.82735
		36.1478	68.2209				36.2886	3.12458			71.7886	3.59435				36.2886	3.38461			36.9007	4.32844			36.9007	3.82735
		37.2081	68.2206				37.3492	3.12451			73.8113	3.59448				37.3492	3.38452			37.9267	4.32842			37.9267	3.82741
		38.2689	68.2205				38.4102	3.12462			75.8342	3.59456				38.4102	3.38452			38.9527	4.3285			38.9527	3.82741
		39.3298	68.2204				39.4712	3.12456			77.8569	3.59453				39.4712	3.38456			39.9786	4.32845			39.9786	3.8274
		40.3906	68.2201				40.533	3.12466			79.8797	3.5946				40.533	3.38452			41.0047	4.32847			41.0047	3.82742
		41.4517	68.22				41.5943	3.12458			81.9025	3.59455				41.5943	3.38454			42.0306	4.32846			42.0306	3.82737
		42.5126	68.2199				42.6562	3.1246			83.9252	3.59459				42.6562	3.38444			43.0566	4.32853			43.0566	3.82739
		43.5728	68.2197				43.7177	3.12453			85.948	3.59471				43.7177	3.38442			44.0826	4.32854			44.0826	3.82738
		44.633	68.2195				44.7797	3.12466			87.9708	3.59468				44.7797	3.38449			45.1086	4.32847			45.1086	3.82737
		45.6933	68.2195				45.8413	3.12458			89.9936	3.59476				45.8413	3.38447			46.1346	4.32843			46.1346	3.82739
		46.7541	68.2194				46.9028	3.12458			92.0164	3.59503				46.9028	3.3844			47.1606	4.32842			47.1606	3.82736
		47.815	68.2194				47.9911	3.12456			94.0391	3.59507				47.9911	3.38437			48.1866	4.3285			48.1866	3.8274
		48.8759	68.2191				49.0527	3.12456			96.0619	3.59487				49.0527	3.38444			49.2126	4.3285			49.2126	3.82742
		50.0153	68.219				50.1138	3.12458			98.0847	3.59508				50.1138	3.38444			50.2386	4.32847			50.2386	3.8274
		51.0762	68.2188				51.175	3.12458			100.107	3.59512				51.175	3.38435			51.2646	4.3285			51.2646	3.82735
		52.1373	68.2188				52.2371	3.12456			102.13	3.59521				52.2371	3.38444			52.2906	4.32853			52.2906	3.8274
		53.1983	68.2189				53.2985	3.12453			104.153	3.59532				53.2985	3.38452			53.3166	4.32853			53.3166	3.82739
		54.259	68.2188				54.359	3.12453			106.176	3.59526				54.359	3.38449			54.3426	4.32846			54.3426	3.82737
		55.3197	68.2185				55.4213	3.12456			108.199	3.5953				55.4213	3.38454			55.3686	4.3285			55.3686	3.8274
		56.3789	68.2186				56.4816	3.12458			110.221	3.59541				56.4816	3.38444			56.3946	4.32853			56.3946	3.82744
		57.4389	68.2185				57.5426	3.12453			112.244	3.59531				57.5426	3.38454			57.4205	4.32852			57.4205	3.82743
		58.4997	68.2185				58.6038	3.12456			114.267	3.59548				58.6038	3.38456			58.4465	4.32851			58.4465	3.82738
		59.5601	68.2183				59.6654	3.12451			116.29	3.59539				59.6654	3.38461			59.4725	4.32848			59.4725	3.82742
		60.6193	68.2184				60.7267	3.12451			118.312	3.59545				60.7267	3.38456			60.4985	4.32848			60.4985	3.82743
		61.6805	68.2185				61.788	3.12456			120.335	3.59547				61.788	3.38447			61.5244	4.32852			61.5244	3.82745
		62.7413	68.2186				62.8491	3.12456			122.358	3.5955				62.8491	3.38445			62.5504	4.32851			62.5504	3.82745
		63.8016	68.2183				63.9105	3.1246			124.381	3.59551				63.9105	3.38442			63.5763	4.32858			63.5763	3.82744
		64.8616	68.2183				64.9721	3.12456			126.404	3.59565				64.9721	3.3844			64.6023	4.32857			64.6023	3.82744
		65.9208	68.2176				66.0342	3.12456			128.426	3.59567				66.0342	3.38444			65.6283	4.32852			65.6283	3.82742
		66.9817	68.217				67.0955	3.12459			130.449	3.59574				67.0955	3.38447			66.6543	4.32852			66.6543	3.82744
		68.0427	68.2165				68.1566	3.12455			132.472	3.59575				68.1566	3.38437			67.6803	4.32854			67.6803	3.82747
		69.1046	68.2159				69.2181	3.12458			134.495	3.59588				69.2181	3.3843			68.7063	4.32856			68.7063	3.82739
		70.1654	68.2153				70.2787	3.12456			136.517	3.59567				70.2787	3.38439			69.7322	4.3286			69.7322	3.82742
		71.2266	68.2148				71.3398	3.12456			138.54	3.59599				71.3398	3.38449			70.7582	4.32866			70.7582	3.82742
		72.2879	68.2144				72.4015	3.12458			140.563	3.59587				72.4015	3.38444			71.7842	4.3286			71.7842	3.8274
		73.3487	68.2139				73.4633	3.12456			142.586	3.59606				73.4633	3.38458			72.8102	4.32862			72.8102	3.82735
		74.4662	68.2138				74.5253	3.12462			144.609	3.596				74.5253	3.38451			73.8362	4.3286			73.8362	3.82739
		75.5273	68.2136				75.5867	3.12468			146.631	3.59626				75.5867	3.38473			74.8622	4.32858			74.8622	3.82736
		76.5881	68.2134				76.648	3.12466			148.654	3.59613				76.648	3.3847			75.8881	4.32861			75.8881	3.82734
		77.6482	68.2134				77.7092	3.12462			150.677	3.59612				77.7092	3.38489			76.9141	4.32863			76.9141	3.82739
		78.7093	68.2131				78.7708	3.12462			152.7	3.59622				78.7708	3.38494			77.9401	4.32864			77.9401	3.8274
		79.7693	68.2129				79.8321	3.12471			154.723	3.59605				79.8321	3.38497			78.966	4.32855			78.966	3.82739
		80.8295	68.2129				80.9055	3.12471			156.745	3.59623				80.9055	3.38497			79.992	4.32857			79.992	3.82741
		81.8902	68.2127				81.967	3.12473			158.768	3.5962				81.967	3.38506			81.018	4.32911			81.018	3.82732
		82.9495	68.2127				83.0274	3.12474			160.791	3.59645				83.0274	3.3853			82.044	4.32876			82.044	3.82734
		84.0096	68.2129				84.0882	3.12471			162.814	3.5962				84.0882	3.38547			83.07	4.3286			83.07	3.82736
		85.0696	68.2127				85.1502	3.12467			164.836	3.59643				85.1502	3.38549			84.0959	4.32848			84.0959	3.8274
		86.1297	68.2124				86.2109	3.12467			166.859	3.59634				86.2109	3.38561			85.1219	4.32841			85.1219	3.82737
		87.19	68.2126				87.2724	3.12472			168.882	3.59645				87.2724	3.3858			86.1479	4.32837			86.1479	3.82736
		88.2501	68.2124				88.3332	3.12467			170.905	3.59646				88.3332	3.38599			87.1738	4.32838			87.1738	3.82726
		89.3102	68.2122				89.3941	3.12466			172.928	3.5965				89.3941	3.38602			88.1998	4.32831			88.1998	3.8273
		90.3711	68.2121				90.4562	3.12468			174.95	3.59666				90.4562	3.38633			89.2258	4.32837			89.2258	3.82726
		91.433	68.2121				91.5178	3.12468			176.973	3.59652				91.5178	3.38628			90.2518	4.32839			90.2518	3.82728
		92.5763	68.2126				92.5791	3.12477			178.996	3.59654				92.5791	3.38649			91.2778	4.32832			91.2778	3.82728
		93.6373	68.2126				93.6403	3.12472			181.019	3.59663				93.6403	3.38668			92.3038	4.32831			92.3038	3.8273
		94.6973	68.2123				94.7011	3.12475			183.041	3.59664				94.7011	3.38673			93.3298	4.32834			93.3298	3.82727
		95.7582	68.2122				95.7617	3.12481			185.064	3.59657				95.7617	3.38699			94.3558	4.3283			94.3558	3.82736
		96.8176	68.2121				96.8234	3.12475			187.087	3.59665				96.8234	3.38716			95.3817	4.32829			95.3817	3.8273
		97.8775	68.2118				97.884	3.12478			189.11	3.59666				97.884	3.38728			96.4077	4.32828			96.4077	3.82735
		98.9379	68.2118				98.946	3.12477			191.133	3.59666				98.946	3.38749			97.4337	4.32835			97.4337	3.82737
		99.9979	68.2118				100.008	3.12486			193.155	3.59672				100.008	3.38756			98.4596	4.32834			98.4596	3.82728
		101.058	68.2121				101.069	3.1248			195.178	3.59671				101.069	3.38771			99.4856	4.32832			99.4856	3.82737
		102.119	68.2119				102.131	3.12482			197.201	3.59676				102.131	3.3879			100.512	4.32837			100.512	3.8273
		103.179	68.212				103.225	3.1248			199.224	3.59667				103.225	3.38821			101.538	4.32833			101.538	3.82727
		104.239	68.2119				104.287	3.12479			201.246	3.59687				104.287	3.38821			102.564	4.32831			102.564	3.82728
		105.301	68.2118				105.348	3.12483			203.269	3.59694				105.348	3.38847			103.59	4.32826			103.59	3.82733
		106.362	68.2117				106.409	3.12482			205.292	3.59691				106.409	3.38847			104.616	4.32829			104.616	3.82727
		107.422	68.2117				107.47	3.12483			207.315	3.59703				107.47	3.38871			105.642	4.3283			105.642	3.82731
		108.483	68.2118				108.531	3.12484			209.338	3.5969				108.531	3.3889			106.668	4.32827			106.668	3.82729
		109.544	68.2117				109.592	3.12484			211.36	3.59714				109.592	3.38914			107.694	4.32829			107.694	3.82731
		110.604	68.2115				110.651	3.12486			213.383	3.59705				110.651	3.38914			108.72	4.32831			108.72	3.82731
		111.665	68.2115				111.712	3.12486			215.406	3.59712				111.712	3.38938			109.745	4.32831			109.745	3.82734
		112.725	68.2115				112.773	3.12489			217.429	3.59721				112.773	3.38957			110.771	4.3283			110.771	3.82734
		113.786	68.2112				113.834	3.12486			219.451	3.59716				113.834	3.38974			111.797	4.3283			111.797	3.82732
		114.846	68.2113				114.895	3.12491			221.474	3.59712				114.895	3.38988			112.823	4.32831			112.823	3.82732
		115.907	68.2114				115.955	3.12493			223.497	3.59707				115.955	3.39014			113.849	4.3283			113.849	3.82732
		116.969	68.2113				117.016	3.12492			225.52	3.59715				117.016	3.39033			114.875	4.3283			114.875	3.82726
		118.029	68.2113				118.078	3.12494			227.543	3.59723				118.078	3.39045			115.901	4.32831			115.901	3.82724
		119.09	68.2114				119.14	3.12492			229.565	3.59716				119.14	3.39059			116.927	4.32831			116.927	3.82734
		120.151	68.2115				120.2	3.12492			231.588	3.59729				120.2	3.39076			117.953	4.32826			117.953	3.82728
		121.212	68.2115				121.262	3.12494			233.611	3.59722				121.262	3.39116			118.979	4.32831			118.979	3.8273
		122.273	68.2114				122.323	3.12497			235.634	3.5972				122.323	3.39126			120.005	4.32827			120.005	3.82729
		123.335	68.2115				123.384	3.125			237.656	3.59727				123.384	3.39128			121.031	4.32823			121.031	3.82737
		124.396	68.2115				124.445	3.12498			239.679	3.59726				124.445	3.3915			122.057	4.32825			122.057	3.82738
		125.457	68.2115				125.564	3.12498			241.702	3.59731				125.564	3.39171			123.083	4.3282			123.083	3.8273
		126.518	68.2116				126.626	3.12498			243.725	3.59727				126.626	3.39178			124.109	4.32824			124.109	3.82726
		127.579	68.2116				127.687	3.12496			245.748	3.59736				127.687	3.39209			125.135	4.32826			125.135	3.82724
		128.64	68.2115				128.748	3.125			247.77	3.59723				128.748	3.39222			126.161	4.3283			126.161	3.82733
		129.701	68.2116				129.809	3.125			249.793	3.59725				129.809	3.3924			127.187	4.32824			127.187	3.82734
		130.807	68.2115				130.87	3.12499			251.816	3.59742				130.87	3.39257			128.213	4.32822			128.213	3.8273
		131.868	68.2115				131.931	3.12502			253.839	3.59736				131.931	3.39279			129.239	4.32823			129.239	3.82733
		132.928	68.2116				132.992	3.12507			255.861	3.59743				132.992	3.39298			130.265	4.32824			130.265	3.82737
		133.989	68.2115				134.054	3.12504			257.884	3.59737				134.054	3.39314			131.291	4.32824			131.291	3.82738
		135.05	68.2116				135.115	3.12505			259.907	3.59738				135.115	3.39324			132.317	4.32824			132.317	3.82729
		136.11	68.2115				136.176	3.12512			261.93	3.59744				136.176	3.39348			133.343	4.32824			133.343	3.82733
		137.171	68.2114				137.238	3.12504			263.953	3.59741				137.238	3.39362			134.369	4.32824			134.369	3.82737
		138.23	68.2118				138.298	3.12507			265.975	3.59742				138.298	3.39372			135.395	4.32814			135.395	3.82736
		139.29	68.2115				139.36	3.1251			267.998	3.59748				139.36	3.39388			136.421	4.32819			136.421	3.82735
		140.352	68.2115				140.421	3.12513			270.021	3.59745				140.421	3.39414			137.447	4.32819			137.447	3.82731
		141.413	68.2115				141.483	3.12513			272.044	3.5975				141.483	3.39436			138.473	4.32824			138.473	3.82732
		142.473	68.2117				142.545	3.1251			274.066	3.59754				142.545	3.3944			139.499	4.32814			139.499	3.82736
		143.533	68.2117				143.606	3.12514			276.089	3.59747				143.606	3.39471			140.525	4.32819			140.525	3.82735
		144.593	68.212				144.666	3.1251			278.112	3.5976				144.666	3.39474			141.551	4.32814			141.551	3.82743
		145.655	68.2117				145.727	3.12514			280.135	3.59748				145.727	3.39488			142.577	4.32814			142.577	3.82742
		146.715	68.2117				146.787	3.12516			282.158	3.59779				146.787	3.3951			143.603	4.32809			143.603	3.82736
		147.776	68.2117				147.849	3.12515			284.18	3.59763				147.849	3.39529			144.629	4.32814			144.629	3.82736
		148.836	68.2118				148.91	3.12518			286.203	3.59737				148.91	3.39545			145.655	4.32814			145.655	3.82738
		149.897	68.2118				149.972	3.12521			288.226	3.5974				149.972	3.39557			146.681	4.32809			146.681	3.82741
		150.998	68.2117				151.034	3.12524			290.249	3.59751				151.034	3.39581			147.707	4.32809			147.707	3.82746
		152.06	68.2117				152.096	3.1252			292.271	3.59733				152.096	3.39595			148.733	4.32809			148.733	3.82753
		153.121	68.2117				153.158	3.12524			294.294	3.59745				153.158	3.396			149.759	4.32809			149.759	3.82746
		154.181	68.2117				154.218	3.12524			296.317	3.59741				154.218	3.39626			150.785	4.32809			150.785	3.82748
		155.242	68.2119				155.278	3.12524			298.34	3.59742				155.278	3.3964			151.811	4.32804			151.811	3.82746
		156.303	68.212				156.339	3.12528			300.363	3.5974				156.339	3.3965			152.837	4.32799			152.837	3.82743
		157.363	68.2121				157.4	3.12533			302.385	3.59757				157.4	3.39676			153.863	4.32804			153.863	3.82747
		158.424	68.2118				158.462	3.1253			304.408	3.59769				158.462	3.39679			154.889	4.32809			154.889	3.82749
		159.484	68.212				159.523	3.12526			306.431	3.59767				159.523	3.39705			155.915	4.32799			155.915	3.82751
		160.545	68.2123				160.585	3.1253			308.454	3.59766				160.585	3.39703			156.941	4.32804			156.941	3.8274
		161.606	68.2122				161.647	3.1253			310.476	3.59797				161.647	3.39729			157.967	4.32804			157.967	3.82742
		162.667	68.2123				162.708	3.12528			312.499	3.59795				162.708	3.39745			158.993	4.32804			158.993	3.82764
		163.728	68.2124				163.769	3.12536			314.522	3.59781				163.769	3.39774			160.019	4.32804			160.019	3.82746
		164.79	68.2124				164.83	3.12532			316.545	3.59784				164.83	3.39769			161.045	4.32804			161.045	3.82731
		165.85	68.2127				165.904	3.12537			318.568	3.59791				165.904	3.39796			162.071	4.32809			162.071	3.82723
		166.91	68.2126				166.966	3.12536			320.59	3.59777				166.966	3.39815			163.097	4.32809			163.097	3.82718
		167.969	68.2129				168.027	3.12539			322.613	3.5979				168.027	3.39831			164.123	4.32814			164.123	3.8272
		169.044	68.2127				169.088	3.12536			324.636	3.59799				169.088	3.39843			165.149	4.32809			165.149	3.82711
		170.105	68.2127				170.149	3.12542			326.659	3.59801				170.149	3.39865			166.175	4.32809			166.175	3.82718
		171.165	68.2127				171.21	3.12539			328.681	3.59809				171.21	3.39884			167.201	4.32799			167.201	3.8272
		172.226	68.2126				172.27	3.12545			330.704	3.59823				172.27	3.39895			168.227	4.32809			168.227	3.82712
		173.286	68.2127				173.332	3.12544			332.727	3.59826				173.332	3.399			169.253	4.32814			169.253	3.82711
		174.347	68.2126				174.393	3.12545			334.75	3.5982				174.393	3.39914			170.279	4.32809			170.279	3.82714
		175.407	68.2126				175.454	3.12545			336.773	3.59828				175.454	3.39934			171.305	4.32814			171.305	3.8271
		176.468	68.2127				176.515	3.12549			338.795	3.59838				176.515	3.39955			172.331	4.32809			172.331	3.82709
		177.53	68.2126				177.576	3.12545			340.818	3.59838				177.576	3.39974			173.357	4.32814			173.357	3.82707
		178.589	68.2126				178.638	3.12547			342.841	3.59832				178.638	3.39967			174.383	4.32814			174.383	3.82716
		179.649	68.2127				179.699	3.12547			344.864	3.5984				179.699	3.39986			175.408	4.32809			175.408	3.82715
		180.711	68.2126				180.76	3.12551			346.886	3.59832				180.76	3.39998			176.434	4.32809			176.434	3.82712
		181.772	68.2126				181.822	3.12546			348.909	3.59838				181.822	3.40015			177.46	4.32809			177.46	3.82718
		182.833	68.2128				182.884	3.1255			350.932	3.59837				182.884	3.40031			178.486	4.32809			178.486	3.82714
		183.893	68.2127				183.946	3.12554			352.955	3.59852				183.946	3.4005			179.512	4.32819			179.512	3.82711
		184.955	68.2127				185.007	3.12556			354.978	3.59848				185.007	3.40062			180.538	4.32809			180.538	3.82705
		186.015	68.2126				186.069	3.12556			357	3.59854				186.069	3.40077			181.564	4.32814			181.564	3.82709
		187.076	68.2127				187.131	3.12554			359.023	3.59863				187.131	3.40103			182.59	4.32814			182.59	3.8271
		188.137	68.2125				188.192	3.12554			361.046	3.59843				188.192	3.40112			183.616	4.32814			183.616	3.82706
		189.197	68.2127				189.253	3.12554			363.069	3.59844				189.253	3.40115			184.642	4.32814			184.642	3.82708
		190.257	68.2125				190.315	3.12556			365.091	3.5986				190.315	3.40127			185.668	4.32819			185.668	3.82711
		191.318	68.2126				191.378	3.12551			367.114	3.59865				191.378	3.40143			186.694	4.32814			186.694	3.82712
		192.378	68.2125				192.472	3.12566			369.137	3.59859				192.472	3.40162			187.72	4.32814			187.72	3.8271
		193.439	68.2127				193.532	3.12557			371.16	3.59856				193.532	3.4016			188.746	4.32814			188.746	3.8271
		194.501	68.2125				194.593	3.12568			373.183	3.5986				194.593	3.40193			189.772	4.32809			189.772	3.82712
		195.562	68.2126				195.653	3.12563			375.205	3.59864				195.653	3.40194			190.798	4.32814			190.798	3.8271
		196.622	68.2126				196.715	3.12562			377.228	3.59841				196.715	3.40201			191.824	4.32809			191.824	3.8271
		197.682	68.2126				197.776	3.12561			379.251	3.59853				197.776	3.40208			192.85	4.32809			192.85	3.82711
		198.743	68.2126				198.837	3.12568			381.274	3.59846				198.837	3.40229			193.876	4.32804			193.876	3.82712
		199.805	68.2126				199.898	3.12562			383.296	3.59848				199.898	3.40246			194.902	4.32809			194.902	3.82706
		200.866	68.2125				200.959	3.12566			385.319	3.59834				200.959	3.40243			195.928	4.32814			195.928	3.82711
		201.926	68.2127				202.021	3.1257			387.342	3.59853				202.021	3.4026			196.954	4.32809			196.954	3.82706
		202.986	68.2125				203.083	3.12568			389.365	3.59849				203.083	3.40277			197.98	4.32814			197.98	3.82702
		204.048	68.2124				204.144	3.12571			391.388	3.59846				204.144	3.40286			199.006	4.32809			199.006	3.82704
		205.109	68.2123				205.206	3.12571			393.41	3.59845				205.206	3.40291			200.032	4.32809			200.032	3.82699
		206.169	68.2124				206.266	3.12571			395.433	3.59842				206.266	3.40305			201.058	4.32814			201.058	3.82703
		207.23	68.2126				207.328	3.12571			397.456	3.59854				207.328	3.40327			202.084	4.32809			202.084	3.82705
		208.292	68.2125				208.389	3.12568			399.479	3.59852				208.389	3.40353			203.11	4.32809			203.11	3.8271
		209.353	68.2125				209.451	3.12571			401.501	3.59848				209.451	3.40344			204.136	4.32809			204.136	3.82703
		210.414	68.2125				210.512	3.12577			403.524	3.59838				210.512	3.40355			205.162	4.32809			205.162	3.82701
		211.474	68.2127				211.574	3.12573			405.547	3.59853				211.574	3.40367			206.188	4.32809			206.188	3.82701
		212.535	68.2127				212.634	3.12577			407.57	3.59848				212.634	3.40374			207.214	4.32809			207.214	3.82703
		213.669	68.2125				213.695	3.12576			409.593	3.59827				213.695	3.40389			208.24	4.32814			208.24	3.82703
		214.729	68.2126				214.756	3.12582			411.615	3.59835				214.756	3.40401			209.266	4.32814			209.266	3.82697
		215.79	68.2125				215.818	3.12575			413.638	3.59831				215.818	3.40413			210.292	4.32809			210.292	3.82697
		216.852	68.2126				216.909	3.12582			415.661	3.59843				216.909	3.40405			211.318	4.32809			211.318	3.82694
		217.913	68.2125				217.97	3.12586			417.684	3.59824				217.97	3.40427			212.344	4.32809			212.344	3.82694
		218.974	68.2125				219.031	3.12581			419.706	3.5982				219.031	3.40441			213.37	4.32804			213.37	3.82698
		220.035	68.2125				220.093	3.12577			421.729	3.59821				220.093	3.40446			214.396	4.32799			214.396	3.82701
		221.096	68.2124				221.154	3.12583			423.752	3.59819				221.154	3.40451			215.422	4.32809			215.422	3.82704
		222.156	68.2126				222.214	3.12584			425.775	3.59835				222.214	3.40465			216.448	4.32804			216.448	3.82699
		223.215	68.2125				223.275	3.12587			427.798	3.59831				223.275	3.4047			217.474	4.32809			217.474	3.82703
		224.275	68.2125				224.335	3.12582			429.82	3.59841				224.335	3.40491			218.5	4.32804			218.5	3.82697
		225.336	68.2125				225.397	3.12587			431.843	3.59834				225.397	3.40503			219.526	4.32814			219.526	3.827
		226.396	68.2125				226.458	3.12586			433.866	3.59846				226.458	3.40496			220.552	4.32814			220.552	3.82702
		227.456	68.2125				227.519	3.12592			435.889	3.59845				227.519	3.40512			221.577	4.32809			221.577	3.82701
		228.518	68.2126				228.581	3.12593			437.911	3.59824				228.581	3.40522			222.603	4.32809			222.603	3.82701
		229.578	68.2125				229.642	3.12583			439.934	3.59853				229.642	3.40532			223.629	4.32809			223.629	3.82701
		230.639	68.2125				230.704	3.1259			441.957	3.59824				230.704	3.40532			224.655	4.32804			224.655	3.82703
		231.7	68.2124				231.766	3.12589			443.98	3.59838				231.766	3.40541			225.681	4.32809			225.681	3.82703
		232.761	68.2124				232.827	3.12587			446.003	3.59831				232.827	3.40555			226.707	4.32809			226.707	3.82701
		233.82	68.2125				233.888	3.12594			448.025	3.59841				233.888	3.40565			227.733	4.32809			227.733	3.82701
		234.881	68.2126				234.948	3.12594			450.048	3.59824				234.948	3.40579			228.759	4.32799			228.759	3.82703
		235.966	68.2126				236.009	3.12598			452.071	3.59824				236.009	3.40582			229.785	4.32799			229.785	3.82702
		237.026	68.2124				237.07	3.12599			454.094	3.5981				237.07	3.40591			230.811	4.32799			230.811	3.82702
		238.102	68.2125				238.131	3.12597			456.117	3.59809				238.131	3.40598			231.837	4.32799			231.837	3.82702
		239.163	68.2124				239.193	3.12599			458.139	3.59819				239.193	3.40596			232.863	4.32804			232.863	3.82695
		240.224	68.2124				240.254	3.126			460.162	3.59813				240.254	3.40605			233.889	4.32799			233.889	3.82695
		241.285	68.2125				241.315	3.12598			462.185	3.59819				241.315	3.40622			234.915	4.32799			234.915	3.82696
		242.345	68.2126				242.376	3.12603			464.208	3.59819				242.376	3.40615			235.941	4.32794			235.941	3.82696
		243.406	68.2123				243.438	3.12604			466.23	3.59829				243.438	3.40629			236.967	4.32804			236.967	3.82694
		244.468	68.2124				244.499	3.12604			468.253	3.59826				244.499	3.40643			237.993	4.32799			237.993	3.82696
		245.529	68.2125				245.56	3.12607			470.276	3.59818				245.56	3.40646			239.019	4.32804			239.019	3.82695
		246.589	68.2125				246.62	3.12609			472.299	3.59825				246.62	3.40656			240.045	4.32804			240.045	3.82701
		247.65	68.2124				247.68	3.12607			474.322	3.59827				247.68	3.40667			241.071	4.32799			241.071	3.8269
		248.71	68.2122				248.74	3.12612			476.344	3.59821				248.74	3.40677			242.097	4.32799			242.097	3.82696
		249.771	68.2123				249.801	3.12614			478.367	3.59817				249.801	3.40677			243.123	4.32804			243.123	3.82697
		250.831	68.2123				250.862	3.12615			480.39	3.59821				250.862	3.40691			244.149	4.32804			244.149	3.82699
		251.892	68.2123				251.924	3.12615			482.413	3.59817				251.924	3.40694			245.175	4.32799			245.175	3.8269
		252.952	68.2123				252.985	3.12619			484.435	3.59807				252.985	3.40703			246.201	4.32799			246.201	3.82697
		254.012	68.2122				254.046	3.12615			486.458	3.59821				254.046	3.40701			247.227	4.32804			247.227	3.82689
		255.073	68.2123				255.107	3.12614			488.481	3.59816				255.107	3.40711			248.253	4.32804			248.253	3.82689
		256.134	68.2124				256.169	3.12616			490.504	3.5983				256.169	3.40708			249.279	4.32804			249.279	3.82698
		257.194	68.2123				257.231	3.12624			492.527	3.59834				257.231	3.40737			250.305	4.32804			250.305	3.82692
		258.255	68.2123				258.292	3.12621			494.549	3.59813				258.292	3.40734			251.331	4.32799			251.331	3.82689
		259.316	68.2124				259.352	3.12624			496.572	3.5982				259.352	3.40742			252.357	4.32799			252.357	3.82687
		260.376	68.2123				260.415	3.12621			498.595	3.59821				260.415	3.40749			253.383	4.32809			253.383	3.82688
		261.436	68.212				261.476	3.12625			500.618	3.59815				261.476	3.40751			254.409	4.32804			254.409	3.82691
		262.551	68.2122				262.537	3.12621			502.64	3.59819				262.537	3.40751			255.435	4.32809			255.435	3.8269
		263.611	68.2123				263.597	3.12624			504.663	3.59825				263.597	3.40768			256.461	4.32809			256.461	3.82684
		264.672	68.2121				264.659	3.12624			506.686	3.59829				264.659	3.40777			257.487	4.32804			257.487	3.8269
		265.733	68.2122				265.787	3.1263			508.709	3.59824				265.787	3.40775			258.513	4.32799			258.513	3.82692
		266.795	68.2121				266.848	3.12632			510.732	3.5981				266.848	3.4078			259.538	4.32804			259.538	3.82688
		267.856	68.2121				267.908	3.12628			512.755	3.59819				267.908	3.40779			260.564	4.32804			260.564	3.82689
		268.917	68.2122				268.97	3.12629			514.777	3.59803				268.97	3.40798			261.59	4.32809			261.59	3.82689
		269.978	68.2122				270.031	3.1263			516.8	3.59801				270.031	3.40791			262.616	4.32804			262.616	3.8269
		271.038	68.2119				271.093	3.12636			518.823	3.59795				271.093	3.40796			263.642	4.32804			263.642	3.82687
		272.098	68.212				272.156	3.12631			520.846	3.598				272.156	3.40803			264.668	4.32809			264.668	3.82685
		273.16	68.2119				273.217	3.12634			522.868	3.59802				273.217	3.40808			265.694	4.32804			265.694	3.82687
		274.219	68.212				274.278	3.12636			524.891	3.59803				274.278	3.40818			266.72	4.32809			266.72	3.8269
		275.279	68.2121				275.339	3.12633			526.914	3.59798				275.339	3.40825			267.746	4.32804			267.746	3.8269
		276.34	68.2122				276.401	3.12639			528.937	3.598				276.401	3.4082			268.772	4.32804			268.772	3.82693
		277.4	68.212				277.462	3.12632			530.96	3.59812				277.462	3.40825			269.798	4.32809			269.798	3.82692
		278.461	68.2119				278.523	3.12634			532.982	3.59796				278.523	3.40832			270.824	4.32804			270.824	3.82689
		279.521	68.212				279.584	3.12641			535.005	3.59804				279.584	3.40834			271.85	4.32804			271.85	3.8269
		280.581	68.2118				280.646	3.12639			537.028	3.59783				280.646	3.40839			272.876	4.32804			272.876	3.8269
		281.643	68.2119				281.707	3.12641			539.051	3.59801				281.707	3.40849			273.902	4.32804			273.902	3.82693
		282.704	68.2119				282.769	3.12642			541.073	3.59789				282.769	3.40865			274.928	4.32809			274.928	3.82694
		283.763	68.2119				283.83	3.12645			543.096	3.59781				283.83	3.40861			275.954	4.32809			275.954	3.82691
		284.824	68.2116				284.891	3.12651			545.119	3.59785				284.891	3.40863			276.98	4.32809			276.98	3.82689
		285.885	68.2118				285.953	3.12646			547.142	3.59781				285.953	3.40861			278.006	4.32814			278.006	3.82692
		286.946	68.2119				287.014	3.12645			549.165	3.5978				287.014	3.4087			279.032	4.32809			279.032	3.82692
		288.007	68.2118				288.076	3.12641			551.187	3.59775				288.076	3.40868			280.058	4.32809			280.058	3.82697
		289.068	68.2118				289.137	3.1265			553.21	3.59777				289.137	3.40887			281.084	4.32809			281.084	3.82693
		290.131	68.2117				290.198	3.12646			555.233	3.59785				290.198	3.40884			282.11	4.32814			282.11	3.82684
		291.192	68.2116				291.259	3.12651			557.256	3.59786				291.259	3.40903			283.136	4.32804			283.136	3.82693
		292.253	68.2116				292.331	3.12655			559.279	3.59791				292.331	3.40894			284.162	4.32814			284.162	3.82688
		293.313	68.2116				293.392	3.12654			561.301	3.59786				293.392	3.40906			285.188	4.32809			285.188	3.82685
		294.374	68.2115				294.453	3.12655			563.324	3.59785				294.453	3.40906			286.214	4.32814			286.214	3.82684
		295.434	68.2116				295.515	3.12651			565.347	3.59777				295.515	3.40918			287.24	4.32814			287.24	3.82687
		296.495	68.2116				296.576	3.12654			567.37	3.59784				296.576	3.40911			288.266	4.32814			288.266	3.82685
		297.555	68.2117				297.636	3.12656			569.392	3.59771				297.636	3.40918			289.292	4.32814			289.292	3.82687
		298.616	68.2116				298.698	3.12656			571.415	3.59784				298.698	3.40918			290.318	4.32809			290.318	3.82682
		299.677	68.2114				299.759	3.12655			573.438	3.59778				299.759	3.40927			291.344	4.32814			291.344	3.8268
		300.738	68.2116				300.819	3.12655			575.461	3.59778				300.819	3.4093			292.37	4.32824			292.37	3.82687
		301.798	68.2115				301.88	3.12657			577.484	3.59775				301.88	3.40939			293.396	4.32814			293.396	3.82684
		302.859	68.2113				302.94	3.1266			579.506	3.5977				302.94	3.40939			294.422	4.32819			294.422	3.82685
		303.919	68.2115				304.001	3.12662			581.529	3.59759				304.001	3.40939			295.448	4.32814			295.448	3.82681
		304.98	68.2116				305.062	3.12657			583.552	3.59754				305.062	3.40944			296.474	4.32814			296.474	3.82682
		306.04	68.2114				306.122	3.12657			585.575	3.59763				306.122	3.40941			297.5	4.32814			297.5	3.82689
		307.1	68.2113				307.183	3.12662			587.597	3.59761				307.183	3.40948			298.526	4.32819			298.526	3.82678
		308.161	68.2112				308.243	3.12666			589.62	3.59749				308.243	3.40953			299.552	4.32814			299.552	3.82676
		309.293	68.2113				309.304	3.12663			591.643	3.59743				309.304	3.40951			300.577	4.32814			300.577	3.82673
		310.355	68.2113				310.365	3.12663			593.666	3.59744				310.365	3.40963			301.603	4.32819			301.603	3.82675
		311.416	68.2111				311.426	3.12663			595.689	3.59739				311.426	3.40951			302.629	4.32819			302.629	3.82679
		312.476	68.2112				312.488	3.12668			597.711	3.59734				312.488	3.40963			303.655	4.32819			303.655	3.82677
		313.537	68.2111				313.549	3.12666			599.734	3.59734				313.549	3.40963			304.681	4.32819			304.681	3.82673
		314.597	68.2112				314.61	3.12672			601.757	3.59732				314.61	3.40963			305.707	4.32819			305.707	3.82673
		315.658	68.2112				315.671	3.12666			603.78	3.59725				315.671	3.40967			306.733	4.32824			306.733	3.82662
		316.719	68.211				316.732	3.12672			605.802	3.59737				316.732	3.40972			307.759	4.32829			307.759	3.8267
		317.78	68.2112				317.794	3.12668			607.825	3.59731				317.794	3.40975			308.785	4.32824			308.785	3.82673
		318.841	68.211				318.855	3.12671			609.848	3.59734				318.855	3.40975			309.811	4.32829			309.811	3.82665
		319.903	68.2109				319.917	3.12672			611.871	3.59721				319.917	3.40979			310.837	4.32829			310.837	3.82664
		320.963	68.2109				320.978	3.12672			613.894	3.59722				320.978	3.40982			311.863	4.32824			311.863	3.82666
		322.023	68.2108				322.039	3.12672			615.916	3.59722				322.039	3.4098			312.889	4.32824			312.889	3.82672
		323.084	68.2107				323.1	3.12677			617.939	3.59715				323.1	3.40998			313.915	4.32824			313.915	3.82669
		324.144	68.2108				324.161	3.1268			619.962	3.59709				324.161	3.40991			314.941	4.32824			314.941	3.82666
		325.206	68.2108				325.222	3.1268			621.985	3.59696				325.222	3.40996			315.967	4.32819			315.967	3.82669
		326.266	68.2108				326.285	3.12678			624.007	3.59697				326.285	3.40989			316.993	4.32814			316.993	3.82663
		327.341	68.2108				327.346	3.12677			626.03	3.59684				327.346	3.41013			318.019	4.32819			318.019	3.82668
		328.402	68.2107				328.407	3.12677			628.053	3.59684				328.407	3.40996			319.045	4.32819			319.045	3.82659
		329.481	68.2107				329.469	3.12681			630.076	3.59682				329.469	3.40991			320.071	4.32814			320.071	3.82656
		330.542	68.2108				330.53	3.12677			632.099	3.59674				330.53	3.41008			321.097	4.32819			321.097	3.82658
		331.601	68.2108				331.591	3.12683			634.121	3.59676				331.591	3.41001			322.123	4.32814			322.123	3.82661
		332.661	68.2105				332.652	3.12683			636.144	3.59667				332.652	3.41008			323.149	4.32814			323.149	3.82659
		333.722	68.2105				333.713	3.12683			638.167	3.59666				333.713	3.40991			324.175	4.32824			324.175	3.82647
		334.782	68.2106				334.774	3.1268			640.19	3.59666				334.774	3.41001			325.201	4.32819			325.201	3.8265
		335.842	68.2104				335.836	3.12681			642.212	3.59651				335.836	3.41001			326.227	4.32819			326.227	3.82651
		336.903	68.2104				336.897	3.12683			644.235	3.59654				336.897	3.41008			327.253	4.32819			327.253	3.82648
		337.965	68.2103				337.959	3.12689			646.258	3.59648				337.959	3.41015			328.279	4.32824			328.279	3.82648
		339.026	68.2105				339.021	3.12686			648.281	3.59638				339.021	3.41025			329.305	4.32824			329.305	3.8265
		340.086	68.2104				340.082	3.12689			650.304	3.59646				340.082	3.41013			330.331	4.32824			330.331	3.82651
		341.146	68.2104				341.144	3.12692			652.326	3.59638				341.144	3.41029			331.357	4.32829			331.357	3.82638
		342.207	68.2102				342.205	3.12696			654.349	3.59633				342.205	3.41022			332.383	4.32829			332.383	3.82642
		343.268	68.2103				343.266	3.12683			656.372	3.59628				343.266	3.41024			333.409	4.32824			333.409	3.82643
		344.329	68.2104				344.328	3.12689			658.395	3.59628				344.328	3.41025			334.435	4.32824			334.435	3.82642
		345.39	68.2101				345.468	3.12693			660.417	3.59621				345.468	3.41024			335.461	4.32819			335.461	3.82645
		346.451	68.2101				346.529	3.12683			662.44	3.59616				346.529	3.41041			336.487	4.32819			336.487	3.82641
		347.511	68.2101				347.59	3.12686			664.463	3.5962				347.59	3.41039			337.513	4.32824			337.513	3.82637
		348.573	68.21				348.651	3.12693			666.486	3.59613				348.651	3.41048			338.539	4.32824			338.539	3.82638
		349.668	68.21				349.712	3.12687			668.509	3.59603				349.712	3.41039			339.565	4.32824			339.565	3.82642
		350.729	68.21				350.774	3.12689			670.531	3.59598				350.774	3.41034			340.591	4.32824			340.591	3.8264
		351.789	68.2098				351.836	3.12692			672.554	3.59603				351.836	3.41041			341.617	4.32819			341.617	3.82631
		352.85	68.2097				352.897	3.12696			674.577	3.59601				352.897	3.41041			342.642	4.32819			342.642	3.82625
		353.911	68.2098				353.959	3.12698			676.6	3.59595				353.959	3.41039			343.668	4.32824			343.668	3.82633
		354.972	68.2097				355.019	3.12695			678.622	3.59596				355.019	3.41055			344.694	4.32819			344.694	3.82633
		356.033	68.2097				356.079	3.12693			680.645	3.59585				356.079	3.41048			345.72	4.32819			345.72	3.82635
		357.094	68.2097				357.14	3.127			682.668	3.59588				357.14	3.41048			346.746	4.32814			346.746	3.82633
		358.155	68.2097				358.201	3.127			684.691	3.59585				358.201	3.41055			347.772	4.32819			347.772	3.82635
		359.215	68.2098				359.261	3.127			686.714	3.59583				359.261	3.41048			348.798	4.32819			348.798	3.8263
		360.275	68.2095				360.323	3.12698			688.736	3.59582				360.323	3.41058			349.824	4.32824			349.824	3.82629
		361.336	68.2098				361.384	3.12698			690.759	3.59576				361.384	3.41048			350.85	4.32819			350.85	3.82632
		362.397	68.2095				362.446	3.12698			692.782	3.59576				362.446	3.41041			351.876	4.32814			351.876	3.82629
		363.457	68.2095				363.507	3.12697			694.805	3.59564				363.507	3.41058			352.902	4.32814			352.902	3.82627
		364.518	68.2094				364.569	3.12709			696.827	3.59561				364.569	3.41063			353.928	4.32819			353.928	3.82623
		365.579	68.2095				365.63	3.12705			698.85	3.59559				365.63	3.41075			354.954	4.32819			354.954	3.82624
		366.64	68.2094				366.691	3.12703			700.873	3.59558				366.691	3.41063			355.98	4.32819			355.98	3.82623
		367.7	68.2092				367.752	3.12707			702.896	3.59558				367.752	3.41065			357.006	4.32819			357.006	3.82623
		368.762	68.2095				368.813	3.12705			704.919	3.59555				368.813	3.4107			358.032	4.32819			358.032	3.82617
		369.822	68.2091				369.874	3.12704			706.941	3.5955				369.874	3.4107			359.058	4.32809			359.058	3.82617
		370.882	68.2093				370.936	3.12709			708.964	3.59544				370.936	3.41074			360.084	4.32814			360.084	3.82628
		371.977	68.2093				371.997	3.1271			710.987	3.59539				371.997	3.41072			361.11	4.32819			361.11	3.82622
		373.037	68.2092				373.059	3.1271			713.01	3.59538				373.059	3.41079			362.136	4.32819			362.136	3.82625
		374.098	68.2091				374.121	3.12712			715.032	3.59543				374.121	3.41072			363.162	4.32814			363.162	3.82623
		375.159	68.2089				375.183	3.12714			717.055	3.5954				375.183	3.41072			364.188	4.32819			364.188	3.82621
		376.22	68.2089				376.245	3.12713			719.078	3.59532				376.245	3.41077			365.214	4.32819			365.214	3.82624
		377.28	68.2089				377.306	3.12713			721.101	3.5954				377.306	3.4107			366.24	4.32819			366.24	3.82626
		378.341	68.2087				378.368	3.1271			723.124	3.59528				378.368	3.41072			367.266	4.32819			367.266	3.82623
		379.401	68.2087				379.429	3.12715			725.146	3.59524				379.429	3.41072			368.292	4.32819			368.292	3.82628
		380.462	68.2088				380.491	3.12715			727.169	3.59534				380.491	3.41077			369.318	4.32819			369.318	3.82621
		381.523	68.2089				381.553	3.12713			729.192	3.59523				381.553	3.41079			370.344	4.32819			370.344	3.82626
		382.584	68.2086				382.614	3.12714			731.215	3.59527				382.614	3.41103			371.37	4.32824			371.37	3.82623
		383.645	68.2086				383.675	3.12721			733.237	3.59526				383.675	3.41087			372.396	4.32814			372.396	3.82613
		384.706	68.2085				384.736	3.12719			735.26	3.59526				384.736	3.41098			373.422	4.32819			373.422	3.82606
		385.767	68.2084				385.797	3.12719			737.283	3.59528				385.797	3.41091			374.448	4.32824			374.448	3.82609
		386.827	68.2083				386.858	3.12719			739.306	3.59521				386.858	3.41098			375.474	4.32814			375.474	3.82605
		387.887	68.2082				387.919	3.12715			741.329	3.59518				387.919	3.41079			376.5	4.32819			376.5	3.82607
		388.947	68.2084				388.979	3.12719			743.351	3.59518				388.979	3.41094			377.526	4.32819			377.526	3.82609
		390.063	68.2083				390.041	3.12719			745.374	3.59509				390.041	3.41098			378.552	4.32819			378.552	3.82604
		391.123	68.2081				391.102	3.12719			747.397	3.59514				391.102	3.41096			379.578	4.32819			379.578	3.8261
		392.184	68.2081				392.163	3.12724			749.42	3.59517				392.163	3.41096			380.604	4.32809			380.604	3.82603
		393.246	68.2081				393.224	3.12718			751.442	3.59506				393.224	3.41098			381.63	4.32824			381.63	3.8261
		394.305	68.2081				394.287	3.12724			753.465	3.59505				394.287	3.41098			382.655	4.32819			382.655	3.82602
		395.365	68.208				395.347	3.12725			755.488	3.59497				395.347	3.41096			383.681	4.32814			383.681	3.82599
		396.424	68.2079				396.409	3.12722			757.511	3.59499				396.409	3.41103			384.707	4.32824			384.707	3.8261
		397.485	68.2082				397.47	3.12723			759.534	3.595				397.47	3.41096			385.733	4.32824			385.733	3.82612
		398.545	68.2079				398.531	3.12724			761.556	3.59495				398.531	3.41105			386.759	4.32824			386.759	3.82609
		399.606	68.2077				399.592	3.12724			763.579	3.59489				399.592	3.41098			387.785	4.32819			387.785	3.82607
		400.667	68.2077				400.654	3.12734			765.602	3.59492				400.654	3.41098			388.811	4.32824			388.811	3.82605
		401.728	68.2078				401.716	3.12729			767.625	3.59489				401.716	3.41098			389.837	4.32824			389.837	3.82608
		402.788	68.2076				402.777	3.12728			769.647	3.59489				402.777	3.41105			390.863	4.32824			390.863	3.82602
		403.849	68.2075				403.838	3.12729			771.67	3.59493				403.838	3.41105			391.889	4.32819			391.889	3.82603
		404.91	68.2075				404.975	3.1273			773.693	3.59489				404.975	3.41105			392.915	4.32824			392.915	3.82607
		405.971	68.2073				406.036	3.12734			775.716	3.59493				406.036	3.41105			393.941	4.32824			393.941	3.82606
		407.032	68.2074				407.097	3.12735			777.739	3.59493				407.097	3.41107			394.967	4.32829			394.967	3.82601
		408.093	68.2075				408.158	3.12731			779.761	3.59491				408.158	3.4111			395.993	4.32824			395.993	3.82605
		409.153	68.2073				409.218	3.12734			781.784	3.59488				409.218	3.41096			397.019	4.32824			397.019	3.826
		410.215	68.2071				410.278	3.12734			783.807	3.59485				410.278	3.41107			398.045	4.32819			398.045	3.82605
		411.275	68.2072				411.338	3.12739			785.83	3.59482				411.338	3.41105			399.071	4.32824			399.071	3.82606
		412.336	68.2072				412.399	3.12734			787.852	3.59484				412.399	3.41105			400.097	4.32824			400.097	3.826
		413.396	68.2071				413.461	3.12736			789.875	3.59482				413.461	3.41112			401.123	4.32824			401.123	3.82599
		414.456	68.207				414.523	3.12735			791.898	3.59473				414.523	3.4111			402.149	4.32819			402.149	3.82597
		415.516	68.2069				415.584	3.1274			793.921	3.59482				415.584	3.4111			403.175	4.32824			403.175	3.82596
		416.576	68.207				416.645	3.12736			795.944	3.59466				416.645	3.41112			404.201	4.32819			404.201	3.82598
		417.637	68.2069				417.707	3.12744			797.966	3.59474				417.707	3.41126			405.227	4.32824			405.227	3.82596
		418.698	68.207				418.767	3.12739			799.989	3.59466				418.767	3.41112			406.253	4.32824			406.253	3.82602
		419.758	68.2069				419.828	3.12739			802.012	3.59468				419.828	3.41112			407.279	4.32819			407.279	3.82599
		420.819	68.2068				420.889	3.12739			804.035	3.59464				420.889	3.41115			408.305	4.32819			408.305	3.82601
		421.88	68.2069				421.951	3.12742			806.057	3.59467				421.951	3.41107			409.331	4.32819			409.331	3.82598
		422.94	68.2068				423.012	3.12742			808.08	3.59461				423.012	3.4111			410.357	4.32819			410.357	3.82597
		424	68.2067				424.073	3.12742			810.103	3.59462				424.073	3.41115			411.383	4.32829			411.383	3.82596
		425.06	68.2066				425.134	3.12743			812.126	3.59457				425.134	3.41119			412.409	4.32824			412.409	3.82601
		426.121	68.2065				426.196	3.12747			814.149	3.59453				426.196	3.41119			413.435	4.32819			413.435	3.82587
		427.181	68.2065				427.258	3.12744			816.171	3.59447				427.258	3.41119			414.461	4.32829			414.461	3.82591
		428.241	68.2064				428.32	3.12749			818.194	3.5945				428.32	3.41119			415.487	4.32819			415.487	3.82585
		429.302	68.2064				429.43	3.12749			820.217	3.59442				429.43	3.41112			416.513	4.32824			416.513	3.82587
		430.441	68.2064				430.491	3.12749			822.24	3.5945				430.491	3.41115			417.539	4.32824			417.539	3.82587
		431.501	68.2062				431.552	3.12744			824.263	3.59448				431.552	3.4111			418.565	4.32824			418.565	3.82592
		432.562	68.2062				432.613	3.12742			826.285	3.59448				432.613	3.41112			419.591	4.32824			419.591	3.82584
		433.623	68.2063				433.675	3.12744			828.308	3.59448				433.675	3.41122			420.617	4.32824			420.617	3.82591
		434.683	68.2062				434.736	3.12742			830.331	3.59448				434.736	3.41122			421.643	4.32819			421.643	3.82585
		435.744	68.2062				435.797	3.12751			832.354	3.59446				435.797	3.41115			422.668	4.32819			422.668	3.82596
		436.805	68.2061				436.859	3.12746			834.376	3.59448				436.859	3.41115			423.694	4.32819			423.694	3.82592
		437.865	68.2061				437.921	3.12746			836.399	3.59447				437.921	3.41119			424.72	4.32819			424.72	3.82585
		438.925	68.2058				438.981	3.12756			838.422	3.59445				438.981	3.41115			425.746	4.32819			425.746	3.8259
		439.985	68.206				440.042	3.12747			840.445	3.59442				440.042	3.41115			426.772	4.32819			426.772	3.82588
		441.045	68.2058				441.103	3.12751			842.467	3.59445				441.103	3.41122			427.798	4.32819			427.798	3.82579
		442.105	68.2057				442.164	3.12749			844.49	3.59449				442.164	3.41119			428.824	4.32819			428.824	3.82584
		443.165	68.2058				443.225	3.12757			846.513	3.59439				443.225	3.41122			429.85	4.32824			429.85	3.82588
		444.227	68.2057				444.287	3.12753			848.536	3.59447				444.287	3.41122			430.876	4.32819			430.876	3.82582
		445.287	68.2059				445.349	3.12757			850.559	3.59444				445.349	3.41122			431.902	4.32824			431.902	3.82586
		446.347	68.2057				446.41	3.12756			852.581	3.59442				446.41	3.41119			432.928	4.32819			432.928	3.82575
		447.408	68.2056				447.471	3.12762			854.604	3.5944				447.471	3.41126			433.954	4.32814			433.954	3.82574
		448.469	68.2057				448.533	3.12762			856.627	3.59438				448.533	3.41124			434.98	4.32819			434.98	3.82571
		449.529	68.2055				449.595	3.12761			858.65	3.59437				449.595	3.41138			436.006	4.32819			436.006	3.82575
		450.61	68.2054				450.657	3.12756			860.673	3.5943				450.657	3.41119			437.032	4.32814			437.032	3.82572
		451.672	68.2054				451.798	3.1276			862.695	3.59433				451.798	3.41122			438.058	4.32819			438.058	3.82571
		452.732	68.2053				452.86	3.1276			864.718	3.5943				452.86	3.41119			439.084	4.32824			439.084	3.82573
		453.793	68.2052				453.921	3.12762			866.741	3.59423				453.921	3.41122			440.11	4.32819			440.11	3.82576
		454.854	68.2051				454.981	3.12757			868.764	3.59424				454.981	3.41122			441.136	4.32824			441.136	3.82578
		455.914	68.2051				456.042	3.12756			870.787	3.59424				456.042	3.41126			442.162	4.32819			442.162	3.82568
		456.974	68.205				457.103	3.12754			872.809	3.59424				457.103	3.41122			443.188	4.32814			443.188	3.82566
		458.034	68.2049				458.164	3.1276			874.832	3.59426				458.164	3.41126			444.214	4.32819			444.214	3.82577
		459.095	68.2049				459.225	3.12761			876.855	3.59429				459.225	3.41119			445.24	4.32819			445.24	3.82571
		460.157	68.2048				460.286	3.1276			878.878	3.59422				460.286	3.41126			446.266	4.32819			446.266	3.82566
		461.218	68.2048				461.347	3.12761			880.9	3.59436				461.347	3.41124			447.292	4.32814			447.292	3.82569
		462.279	68.2047				462.409	3.12754			882.923	3.59435				462.409	3.41126			448.318	4.32819			448.318	3.82569
		463.339	68.2048				463.47	3.12757			884.946	3.59432				463.47	3.41121			449.344	4.32819			449.344	3.82568
		464.4	68.2048				464.531	3.12752			886.969	3.59433				464.531	3.41131			450.37	4.32819			450.37	3.82568
		465.461	68.2045				465.592	3.12757			888.992	3.59423				465.592	3.41126			451.396	4.32819			451.396	3.82566
		466.521	68.2044				466.654	3.12754			891.014	3.59428				466.654	3.41126			452.422	4.32814			452.422	3.82562
		467.582	68.2044				467.716	3.1276			893.037	3.5943				467.716	3.41131			453.448	4.32819			453.448	3.82565
		468.642	68.2046				468.777	3.1276			895.06	3.59437				468.777	3.41136			454.474	4.32824			454.474	3.82564
		469.703	68.2043				469.839	3.12756			897.083	3.59429				469.839	3.41131			455.5	4.32814			455.5	3.82563
		470.763	68.2043				470.901	3.12752			899.105	3.59422				470.901	3.41124			456.526	4.32814			456.526	3.82566
		471.825	68.2044				471.962	3.12762			901.128	3.59416				471.962	3.41136			457.552	4.32809			457.552	3.82558
		472.886	68.2041				473.024	3.12757			903.151	3.59421				473.024	3.41129			458.578	4.32809			458.578	3.82567
		473.946	68.2041				474.107	3.12753			905.174	3.59424				474.107	3.41131			459.604	4.32809			459.604	3.82559
		475.076	68.2042				475.169	3.12752			907.197	3.59419				475.169	3.41126			460.63	4.32814			460.63	3.82556
		476.137	68.2041				476.23	3.12749			909.219	3.59426				476.23	3.41129			461.656	4.32814			461.656	3.82555
		477.198	68.204				477.292	3.12751			911.242	3.59423				477.292	3.41126			462.682	4.32814			462.682	3.82559
		478.259	68.204				478.353	3.12747			913.265	3.59418				478.353	3.41138			463.708	4.32819			463.708	3.82559
		479.319	68.2039				479.414	3.12751			915.288	3.59421				479.414	3.41131			464.734	4.32814			464.734	3.8256
		480.38	68.2031				480.475	3.12756			917.31	3.59416				480.475	3.41126			465.76	4.32814			465.76	3.82553
		481.441	68.2023				481.537	3.12755			919.333	3.59407				481.537	3.41121			466.786	4.32809			466.786	3.82551
		482.501	68.2018				482.599	3.12757			921.356	3.59404				482.599	3.41121			467.812	4.32809			467.812	3.82557
		483.562	68.202				483.66	3.12754			923.379	3.59408				483.66	3.41126			468.838	4.32814			468.838	3.82548
		484.623	68.2022				484.721	3.12749			925.402	3.59403				484.721	3.41119			469.864	4.32814			469.864	3.82545
		485.684	68.2022				485.782	3.12754			927.424	3.59406				485.782	3.41119			470.89	4.32814			470.89	3.82552
		486.745	68.202				486.842	3.12751			929.447	3.59401				486.842	3.41121			471.916	4.32819			471.916	3.82549
		487.805	68.2023				487.904	3.12757			931.47	3.594				487.904	3.41121			472.942	4.32819			472.942	3.82545
		488.866	68.2022				488.965	3.12755			933.493	3.59411				488.965	3.41114			473.968	4.32814			473.968	3.82547
		489.927	68.2024				490.026	3.12751			935.515	3.59408				490.026	3.41121			474.994	4.32819			474.994	3.82545
		490.989	68.2021				491.087	3.1276			937.538	3.59414				491.087	3.41126			476.02	4.32819			476.02	3.82542
		492.049	68.2021				492.149	3.12752			939.561	3.59414				492.149	3.41126			477.046	4.32819			477.046	3.82541
		493.11	68.2019				493.209	3.12754			941.584	3.59409				493.209	3.41128			478.072	4.32819			478.072	3.8254
		494.17	68.2021				494.286	3.12751			943.607	3.59405				494.286	3.41138			479.098	4.32819			479.098	3.82539
		495.231	68.2022				495.348	3.12754			945.629	3.59404				495.348	3.41121			480.124	4.32824			480.124	3.82531
		496.291	68.2019				496.409	3.12757			947.652	3.59412				496.409	3.41131			481.15	4.32819			481.15	3.82534
		497.351	68.2018				497.471	3.12752			949.675	3.59416				497.471	3.41131			482.175	4.32829			482.175	3.82529
		498.411	68.2017				498.533	3.12761			951.698	3.59415				498.533	3.41136			483.201	4.32819			483.201	3.82534
		499.472	68.2016				499.594	3.12756			953.72	3.59411				499.594	3.41136			484.227	4.32819			484.227	3.82524
		500.536	68.2016				500.656	3.12754			955.743	3.5941				500.656	3.41121			485.253	4.32819			485.253	3.82533
		501.597	68.2013				501.717	3.12749			957.766	3.59406				501.717	3.41138			486.279	4.32819			486.279	3.82537
		502.657	68.2013				502.778	3.12752			959.789	3.59398				502.778	3.41114			487.305	4.32814			487.305	3.82531
		503.717	68.2013				503.839	3.12749			961.812	3.59404				503.839	3.41126			488.331	4.32819			488.331	3.82524
		504.778	68.2013				504.9	3.12749			963.834	3.59404				504.9	3.41126			489.357	4.32814			489.357	3.8253
		505.838	68.2011				505.962	3.12749			965.857	3.59409				505.962	3.41119			490.383	4.32819			490.383	3.82529
		506.899	68.201				507.024	3.12751			967.88	3.59406				507.024	3.41129			491.409	4.32814			491.409	3.82531
		507.96	68.2009				508.084	3.12752			969.903	3.59408				508.084	3.41128			492.435	4.32824			492.435	3.82523
		509.021	68.2009				509.145	3.12751			971.925	3.59404				509.145	3.41143			493.461	4.32819			493.461	3.82525
		510.081	68.2007				510.208	3.12751			973.948	3.59403				510.208	3.41126			494.487	4.32819			494.487	3.82521
		511.141	68.2007				511.27	3.12757			975.971	3.59405				511.27	3.41126			495.513	4.32819			495.513	3.82522
		512.201	68.2006				512.348	3.1275			977.994	3.59404				512.348	3.41123			496.539	4.32819			496.539	3.82525
		513.263	68.2006				513.41	3.12749			980.017	3.59406				513.41	3.4113			497.565	4.32814			497.565	3.82525
		514.323	68.2004				514.472	3.12747			982.039	3.59403				514.472	3.41124			498.591	4.32809			498.591	3.82527
		515.456	68.2003				515.533	3.12747			984.062	3.59402				515.533	3.41128			499.617	4.32814			499.617	3.82521
		516.517	68.2002				516.594	3.12746			986.085	3.59397				516.594	3.41136			500.643	4.32814			500.643	3.82518
		517.578	68.2				517.655	3.12745			988.108	3.59399				517.655	3.41133			501.669	4.32814			501.669	3.82515
		518.638	68.2001				518.716	3.1274			990.13	3.59397				518.716	3.41138			502.695	4.32819			502.695	3.82514
		519.699	68.2				519.776	3.12745			992.153	3.59401				519.776	3.41145			503.721	4.32819			503.721	3.82514
		520.759	68.1999				520.839	3.12741			994.176	3.59402				520.839	3.41131			504.747	4.32819			504.747	3.8251
		521.819	68.1998				521.901	3.12749			996.199	3.59397				521.901	3.41094			505.773	4.32819			505.773	3.82501
		522.88	68.1996				522.962	3.12739			998.222	3.59401				522.962	3.41097			506.799	4.32809			506.799	3.82507
		523.94	68.1997				524.022	3.1274			1000.24	3.59395				524.022	3.41094			507.825	4.32809			507.825	3.82496
		525.001	68.1995				525.083	3.12742			1002.27	3.59387				525.083	3.41075			508.851	4.32814			508.851	3.82502
		526.062	68.1994				526.144	3.12739			1004.29	3.59389				526.144	3.41068			509.877	4.32814			509.877	3.82503
		527.122	68.1993				527.207	3.12741			1006.31	3.59395				527.207	3.41056			510.903	4.32814			510.903	3.82501
		528.183	68.1992				528.268	3.12741			1008.34	3.59392				528.268	3.41039			511.929	4.32814			511.929	3.82495
		529.244	68.1993				529.328	3.12739			1010.36	3.59389				529.328	3.41018			512.955	4.32809			512.955	3.82499
		530.305	68.199				530.39	3.12737			1012.38	3.59382				530.39	3.41006			513.981	4.32809			513.981	3.82489
		531.365	68.1989				531.451	3.1274			1014.4	3.59387				531.451	3.40999			515.007	4.32809			515.007	3.82492
		532.425	68.1988				532.514	3.12739			1016.43	3.59387				532.514	3.40987			516.033	4.32814			516.033	3.82501
		533.486	68.1988				533.575	3.12741			1018.45	3.59381				533.575	3.40973			517.059	4.32809			517.059	3.82484
		534.547	68.1986				534.636	3.12734			1020.47	3.5939				534.636	3.40963			518.085	4.32804			518.085	3.82495
		535.608	68.1985				535.698	3.12735			1022.49	3.59385				535.698	3.40949			519.111	4.32809			519.111	3.82497
		536.669	68.1984				536.759	3.12738			1024.52	3.59382				536.759	3.40946			520.137	4.32804			520.137	3.82498
		537.729	68.1982				537.82	3.12736			1026.54	3.59383				537.82	3.40932			521.163	4.32804			521.163	3.82488
		538.79	68.1982				538.88	3.12735			1028.56	3.59385				538.88	3.40915			522.189	4.32809			522.189	3.82486
		539.851	68.1982				539.942	3.12735			1030.59	3.59386				539.942	3.40903			523.215	4.32804			523.215	3.82486
		540.912	68.1977				541.003	3.12735			1032.61	3.59387				541.003	3.40892			524.241	4.32809			524.241	3.82486
		541.973	68.1978				542.064	3.1273			1034.63	3.59393				542.064	3.40887			525.267	4.32799			525.267	3.82483
		543.033	68.1977				543.126	3.12734			1036.65	3.59387				543.126	3.40856			526.293	4.32804			526.293	3.82489
		544.095	68.1973				544.188	3.12726			1038.68	3.59382				544.188	3.40851			527.319	4.32804			527.319	3.82483
		545.155	68.1974				545.249	3.12731			1040.7	3.59377				545.249	3.40834			528.345	4.32809			528.345	3.82476
		546.229	68.1973				546.311	3.12736			1042.72	3.59375				546.311	3.40829			529.371	4.32804			529.371	3.82482
		547.291	68.1971				547.371	3.1273			1044.75	3.59377				547.371	3.40801			530.397	4.32804			530.397	3.8248
		548.352	68.1971				548.432	3.12728			1046.77	3.59378				548.432	3.40796			531.423	4.32804			531.423	3.82483
		549.412	68.1969				549.493	3.12728			1048.79	3.59381				549.493	3.40777			532.449	4.32804			532.449	3.82484
		550.472	68.1968				550.555	3.12731			1050.81	3.5938				550.555	3.40765			533.475	4.32809			533.475	3.82478
		551.532	68.1968				551.615	3.1273			1052.84	3.59378				551.615	3.40755			534.501	4.32809			534.501	3.82477
		552.592	68.1966				552.677	3.1273			1054.86	3.59375				552.677	3.40734			535.527	4.32809			535.527	3.82481
		553.653	68.1966				553.738	3.12726			1056.88	3.59376				553.738	3.40729			536.552	4.32814			536.552	3.82477
		554.713	68.1966				554.799	3.12729			1058.9	3.59379				554.799	3.40712			537.578	4.32809			537.578	3.8248
		555.773	68.1962				555.862	3.12723			1060.93	3.59379				555.862	3.40691			538.604	4.32814			538.604	3.82482
		556.834	68.1962				556.922	3.12728			1062.95	3.59374				556.922	3.40679			539.63	4.32809			539.63	3.82479
		557.895	68.1961				557.984	3.12728			1064.97	3.5937				557.984	3.40667			540.656	4.32804			540.656	3.82472
		558.955	68.1962				559.045	3.12724			1067	3.59373				559.045	3.40662			541.682	4.32809			541.682	3.82471
		560.016	68.1959				560.106	3.12716			1069.02	3.59368				560.106	3.40646			542.708	4.32814			542.708	3.82472
		561.076	68.196				561.167	3.12726			1071.04	3.59377				561.167	3.40636			543.734	4.32809			543.734	3.82476
		562.136	68.1956				562.228	3.12724			1073.06	3.59378				562.228	3.40627			544.76	4.32804			544.76	3.8248
		563.197	68.1955				563.29	3.12718			1075.09	3.59379				563.29	3.40603			545.786	4.32814			545.786	3.82472
		564.258	68.1956				564.351	3.12728			1077.11	3.59373				564.351	3.406			546.812	4.32804			546.812	3.82475
		565.319	68.1955				565.412	3.12721			1079.13	3.59371				565.412	3.40588			547.838	4.32804			547.838	3.82467
		566.393	68.1954				566.474	3.12719			1081.16	3.59376				566.474	3.40562			548.864	4.32809			548.864	3.82473
		567.454	68.1953				567.535	3.12719			1083.18	3.59373				567.535	3.40562			549.89	4.32799			549.89	3.82462
		568.514	68.1951				568.598	3.12721			1085.2	3.59372				568.598	3.4055			550.916	4.32804			550.916	3.82468
		569.575	68.1952				569.713	3.12721			1087.22	3.59377				569.713	3.40538			551.942	4.32804			551.942	3.82463
		570.635	68.195				570.774	3.12715			1089.25	3.59373				570.774	3.40517			552.968	4.32799			552.968	3.82467
		571.695	68.1949				571.836	3.12715			1091.27	3.59371				571.836	3.4051			553.994	4.32799			553.994	3.82463
		572.755	68.1947				572.898	3.12718			1093.29	3.59366				572.898	3.40488			555.02	4.32804			555.02	3.82463
		573.816	68.1946				573.959	3.12718			1095.31	3.59364				573.959	3.40484			556.046	4.32804			556.046	3.82464
		574.876	68.1947				575.02	3.12718			1097.34	3.59371				575.02	3.40465			557.072	4.32804			557.072	3.82462
		575.936	68.1944				576.081	3.12719			1099.36	3.5937				576.081	3.40455			558.098	4.32799			558.098	3.82464
		576.996	68.1943				577.143	3.12719			1101.38	3.59366				577.143	3.40455			559.124	4.32804			559.124	3.82456
		578.057	68.1941				578.204	3.12713			1103.41	3.59369				578.204	3.40443			560.15	4.32799			560.15	3.82459
		579.118	68.194				579.266	3.12716			1105.43	3.59369				579.266	3.40426			561.176	4.32804			561.176	3.82464
		580.178	68.1942				580.327	3.12715			1107.45	3.59364				580.327	3.4041			562.202	4.32804			562.202	3.8246
		581.239	68.1939				581.389	3.12718			1109.47	3.59371				581.389	3.40405			563.228	4.32804			563.228	3.82456
		582.3	68.1938				582.449	3.12714			1111.5	3.59366				582.449	3.40383			564.254	4.32809			564.254	3.82453
		583.361	68.1936				583.51	3.12714			1113.52	3.59364				583.51	3.4039			565.28	4.32804			565.28	3.82456
		584.422	68.1934				584.572	3.12715			1115.54	3.59366				584.572	3.40362			566.306	4.32809			566.306	3.82459
		585.482	68.1933				585.634	3.1271			1117.57	3.59369				585.634	3.40355			567.332	4.32804			567.332	3.82458
		586.555	68.1933				586.694	3.12712			1119.59	3.59371				586.694	3.40345			568.358	4.32804			568.358	3.82457
		587.616	68.1932				587.755	3.12707			1121.61	3.59366				587.755	3.40326			569.384	4.32799			569.384	3.82457
		588.676	68.1931				588.816	3.12707			1123.63	3.59364				588.816	3.40324			570.41	4.32794			570.41	3.82453
		589.736	68.1931				589.928	3.1271			1125.66	3.59366				589.928	3.40321			571.436	4.32794			571.436	3.82454
		590.796	68.1929				590.989	3.12708			1127.68	3.59369				590.989	3.40288			572.462	4.32794			572.462	3.82451
		591.857	68.193				592.049	3.12715			1129.7	3.59371				592.049	3.40285			573.488	4.32799			573.488	3.82456
		592.917	68.1928				593.111	3.12712			1131.72	3.59366				593.111	3.40278			574.514	4.32794			574.514	3.82461
		593.978	68.1926				594.171	3.12709			1133.75	3.59364				594.171	3.40266			575.54	4.32794			575.54	3.82456
		595.039	68.1926				595.232	3.12714			1135.77	3.59366				595.232	3.40257			576.566	4.32794			576.566	3.82463
		596.1	68.1923				596.293	3.12713			1137.79	3.59369				596.293	3.40247			577.592	4.32794			577.592	3.82455
		597.161	68.1924				597.355	3.12705			1139.82	3.59371				597.355	3.40231			578.618	4.32794			578.618	3.8245
		598.222	68.1922				598.416	3.12704			1141.84	3.59366				598.416	3.40228			579.644	4.32789			579.644	3.82449
		599.283	68.1921				599.476	3.12705			1143.86	3.59364				599.476	3.40221			580.67	4.32794			580.67	3.82441
		600.343	68.192				600.537	3.12702			1145.88	3.59366				600.537	3.40202			581.696	4.32799			581.696	3.82443
		601.404	68.1919				601.599	3.12707			1147.91	3.59369				601.599	3.4019			582.722	4.32799			582.722	3.82434
		602.465	68.1918				602.659	3.127			1149.93	3.59368				602.659	3.4019			583.748	4.32789			583.748	3.82446
		603.526	68.1915				603.721	3.12704			1151.95	3.59367				603.721	3.40174			584.774	4.32799			584.774	3.82444
		604.586	68.1914				604.782	3.12699			1153.98	3.59366				604.782	3.40142			585.8	4.32799			585.8	3.82451
		605.647	68.1914				605.843	3.12704			1156	3.59364				605.843	3.4015			586.826	4.32789			586.826	3.82447
		606.713	68.1914				606.904	3.12702			1158.02	3.59372				606.904	3.40135			587.852	4.32794			587.852	3.8244
		607.773	68.1912				607.966	3.12703			1160.04	3.59364				607.966	3.40131			588.878	4.32794			588.878	3.82443
		608.833	68.1911				609.027	3.12702			1162.07	3.59354				609.027	3.40119			589.904	4.32799			589.904	3.82438
		609.895	68.1911				610.099	3.127			1164.09	3.59356				610.099	3.40107			590.93	4.32794			590.93	3.82444
		610.956	68.191				611.162	3.127			1166.11	3.59359				611.162	3.40119			591.956	4.32794			591.956	3.82437
		612.016	68.1907				612.224	3.12702			1168.13	3.59355				612.224	3.40107			592.982	4.32799			592.982	3.82432
		613.076	68.1908				613.284	3.12702			1170.16	3.59359				613.284	3.40076			594.008	4.32794			594.008	3.82433
		614.138	68.1907				614.345	3.127			1172.18	3.59355				614.345	3.40073			595.034	4.32794			595.034	3.82433
		615.199	68.1904				615.406	3.12698			1174.2	3.59349				615.406	3.40056			596.06	4.32799			596.06	3.82426
		616.26	68.1904				616.467	3.12705			1176.23	3.59355				616.467	3.40061			597.086	4.32799			597.086	3.82438
		617.32	68.1902				617.527	3.12698			1178.25	3.59348				617.527	3.40049			598.111	4.32804			598.111	3.82432
		618.381	68.1902				618.588	3.12702			1180.27	3.59363				618.588	3.40044			599.137	4.32799			599.137	3.82433
		619.442	68.1901				619.649	3.127			1182.29	3.59351				619.649	3.40011			600.163	4.32799			600.163	3.8243
		620.503	68.19				620.712	3.127			1184.32	3.59353				620.712	3.40028			601.189	4.32799			601.189	3.82429
		621.564	68.19				621.773	3.12703			1186.34	3.5936				621.773	3.40016			602.215	4.32794			602.215	3.82425
		622.625	68.1897				622.835	3.127			1188.36	3.59368				622.835	3.40007			603.241	4.32789			603.241	3.82423
		623.686	68.19				623.895	3.12698			1190.39	3.59365				623.895	3.39999			604.267	4.32789			604.267	3.8243
		624.747	68.1896				624.957	3.12692			1192.41	3.59352				624.957	3.39995			605.293	4.32794			605.293	3.82427
		625.808	68.1894				626.018	3.12695			1194.43	3.59354				626.018	3.39975			606.319	4.32789			606.319	3.82423
		626.869	68.1893				627.078	3.12693			1196.45	3.5936				627.078	3.39971			607.345	4.32789			607.345	3.82416
		627.929	68.1892				628.14	3.12692			1198.48	3.5935				628.14	3.39961			608.371	4.32794			608.371	3.82419
		628.99	68.1893				629.201	3.12692			1200.5	3.59359				629.201	3.39942			609.397	4.32794			609.397	3.8242
		630.05	68.1893				630.262	3.12698			1202.52	3.59347				630.262	3.39952			610.423	4.32794			610.423	3.82423
		631.111	68.189				631.323	3.12695			1204.54	3.59358				631.323	3.3993			611.449	4.32794			611.449	3.82422
		632.171	68.189				632.383	3.12688			1206.57	3.59355				632.383	3.3993			612.475	4.32794			612.475	3.82418
		633.231	68.1889				633.445	3.12688			1208.59	3.59349				633.445	3.39913			613.501	4.32789			613.501	3.82417
		634.292	68.1887				634.506	3.12688			1210.61	3.59354				634.506	3.39913			614.527	4.32794			614.527	3.82417
		635.353	68.1885				635.566	3.12692			1212.64	3.59362				635.566	3.39906			615.553	4.32789			615.553	3.82423
		636.413	68.1883				636.627	3.12688			1214.66	3.59355				636.627	3.39899			616.579	4.32789			616.579	3.82418
		637.474	68.1884				637.689	3.12684			1216.68	3.59361				637.689	3.3988			617.605	4.32789			617.605	3.82417
		638.535	68.1884				638.749	3.12685			1218.7	3.59352				638.749	3.39892			618.631	4.32794			618.631	3.82411
		639.595	68.1881				639.81	3.12684			1220.73	3.59351				639.81	3.3987			619.657	4.32789			619.657	3.8241
		640.656	68.188				640.872	3.12685			1222.75	3.59345				640.872	3.39866			620.683	4.32789			620.683	3.82408
		641.717	68.1878				641.934	3.12684			1224.77	3.59349				641.934	3.39866			621.709	4.32779			621.709	3.82413
		642.777	68.1879				642.996	3.1269			1226.8	3.59346				642.996	3.39851			622.735	4.32794			622.735	3.82407
		643.838	68.1877				644.056	3.12683			1228.82	3.59359				644.056	3.39834			623.761	4.32784			623.761	3.82406
		644.899	68.1876				645.117	3.12686			1230.84	3.59351				645.117	3.3983			624.787	4.32769			624.787	3.82406
		645.96	68.1875				646.179	3.12684			1232.86	3.59361				646.179	3.39815			625.813	4.32759			625.813	3.82399
		647.02	68.1873				647.241	3.12682			1234.89	3.59358				647.241	3.39823			626.839	4.32759			626.839	3.82411
		648.081	68.1872				648.302	3.12676			1236.91	3.59355				648.302	3.39815			627.865	4.32754			627.865	3.8241
		649.141	68.1873				649.362	3.12677			1238.93	3.5935				649.362	3.39811			628.891	4.32754			628.891	3.82405
		650.203	68.187				650.423	3.12676			1240.95	3.59355				650.423	3.39799			629.917	4.32754			629.917	3.82402
		651.263	68.187				651.483	3.12674			1242.98	3.59356				651.483	3.39789			630.943	4.32754			630.943	3.82397
		652.323	68.187				652.545	3.12674			1245	3.59359				652.545	3.3978			631.969	4.32749			631.969	3.82403
		653.422	68.1867				653.605	3.12681			1247.02	3.59361				653.605	3.39782			632.995	4.32749			632.995	3.82403
		654.483	68.1867				654.666	3.12674			1249.05	3.59352				654.666	3.39772			634.021	4.32749			634.021	3.82398
		655.544	68.1866				655.726	3.12679			1251.07	3.59349				655.726	3.39756			635.047	4.32749			635.047	3.82399
		656.604	68.1866				656.787	3.12679			1253.09	3.59355				656.787	3.3976			636.073	4.32749			636.073	3.82399
		657.665	68.1863				657.847	3.12679			1255.11	3.59345				657.847	3.39741			637.099	4.32744			637.099	3.82396
		658.724	68.1864				658.908	3.12679			1257.14	3.59352				658.908	3.39749			638.125	4.32739			638.125	3.82396
		659.785	68.1863				659.969	3.12681			1259.16	3.59345				659.969	3.39715			639.15	4.32744			639.15	3.82398
		660.845	68.1862				661.03	3.12677			1261.18	3.59355				661.03	3.3972			640.176	4.32744			640.176	3.8239
		661.906	68.186				662.091	3.12677			1263.21	3.59348				662.091	3.39725			641.202	4.32739			641.202	3.82395
		662.966	68.186				663.152	3.12679			1265.23	3.59356				663.152	3.39708			642.228	4.32744			642.228	3.82388
		664.027	68.1857				664.214	3.12679			1267.25	3.59357				664.214	3.39701			643.254	4.32739			643.254	3.82391
		665.087	68.1856				665.275	3.12677			1269.27	3.59363				665.275	3.39701			644.28	4.32734			644.28	3.82388
		666.148	68.1854				666.335	3.12677			1271.3	3.59348				666.335	3.39689			645.306	4.32724			645.306	3.82387
		667.209	68.1854				667.397	3.12674			1273.32	3.59352				667.397	3.39696			646.332	4.32729			646.332	3.82385
		668.27	68.1854				668.457	3.12676			1275.34	3.59351				668.457	3.3968			647.358	4.32724			647.358	3.8238
		669.331	68.1853				669.518	3.12677			1277.36	3.59362				669.518	3.39675			648.384	4.32729			648.384	3.82381
		670.391	68.1852				670.657	3.12677			1279.39	3.5936				670.657	3.39663			649.41	4.32729			649.41	3.82389
		671.452	68.1853				671.719	3.12672			1281.41	3.5937				671.719	3.39672			650.436	4.32729			650.436	3.82389
		672.513	68.1849				672.781	3.12674			1283.43	3.59368				672.781	3.39658			651.462	4.32729			651.462	3.82383
		673.572	68.1849				673.842	3.12674			1285.46	3.59368				673.842	3.39646			652.488	4.32724			652.488	3.82381
		674.633	68.1849				674.903	3.12668			1287.48	3.59364				674.903	3.39663			653.514	4.32734			653.514	3.8238
		675.694	68.1846				675.964	3.12675			1289.5	3.59365				675.964	3.39651			654.54	4.32724			654.54	3.82385
		676.755	68.1847				677.026	3.12667			1291.52	3.59352				677.026	3.39632			655.566	4.32729			655.566	3.82376
		677.816	68.1845				678.087	3.12667			1293.55	3.59351				678.087	3.39629			656.592	4.32729			656.592	3.82378
		678.876	68.1845				679.147	3.12663			1295.57	3.59359				679.147	3.3962			657.618	4.32714			657.618	3.82379
		679.937	68.1844				680.209	3.12666			1297.59	3.59356				680.209	3.39625			658.644	4.32719			658.644	3.82374
		680.998	68.1842				681.269	3.12667			1299.62	3.59354				681.269	3.39622			659.67	4.32719			659.67	3.82373
		682.06	68.1842				682.331	3.12666			1301.64	3.5935				682.331	3.3961			660.696	4.32719			660.696	3.82374
		683.121	68.1841				683.392	3.12671			1303.66	3.5936				683.392	3.39596			661.722	4.32724			661.722	3.82372
		684.183	68.184				684.453	3.12666			1305.68	3.59353				684.453	3.39591			662.748	4.32714			662.748	3.82367
		685.243	68.1839				685.514	3.12668			1307.71	3.59347				685.514	3.39582			663.774	4.32719			663.774	3.82367
		686.304	68.1839				686.576	3.12668			1309.73	3.59362				686.576	3.39577			664.8	4.32719			664.8	3.82368
		687.366	68.1837				687.638	3.12666			1311.75	3.59358				687.638	3.39572			665.826	4.32714			665.826	3.82367
		688.427	68.1835				688.7	3.12666			1313.77	3.59353				688.7	3.39567			666.852	4.32714			666.852	3.82368
		689.488	68.1836				689.762	3.12668			1315.8	3.59361				689.762	3.39567			667.878	4.32714			667.878	3.82366
		690.548	68.1833				690.882	3.12663			1317.82	3.59359				690.882	3.39548			668.904	4.32709			668.904	3.82364
		691.609	68.1834				691.945	3.12662			1319.84	3.5935				691.945	3.3955			669.929	4.32709			669.929	3.82367
		692.669	68.1834				693.006	3.12663			1321.87	3.59343				693.006	3.39548			670.955	4.32709			670.955	3.82369
		693.729	68.1831				694.067	3.12663			1323.89	3.59347				694.067	3.39527			671.981	4.32709			671.981	3.8236
		694.79	68.183				695.13	3.12659			1325.91	3.59347				695.13	3.39539			673.007	4.32694			673.007	3.82359
		695.85	68.1829				696.192	3.12658			1327.93	3.59348				696.192	3.39525			674.033	4.32694			674.033	3.82357
		696.911	68.1827				697.254	3.12657			1329.96	3.59346				697.254	3.39525			675.059	4.32699			675.059	3.82356
		697.972	68.1828				698.316	3.12661			1331.98	3.59347				698.316	3.39524			676.085	4.32694			676.085	3.82353
		699.033	68.1827				699.377	3.1266			1334	3.59353				699.377	3.39508			677.111	4.32689			677.111	3.82353
		700.094	68.1827				700.438	3.12658			1336.03	3.59348				700.438	3.39503			678.137	4.32684			678.137	3.82357
		701.155	68.1824				701.5	3.12657			1338.05	3.5935				701.5	3.39503			679.163	4.32684			679.163	3.82345
		702.216	68.1823				702.561	3.1266			1340.07	3.5936				702.561	3.39498			680.189	4.32689			680.189	3.82347
		703.276	68.1821				703.622	3.12655			1342.09	3.59355				703.622	3.39489			681.215	4.32684			681.215	3.82352
		704.358	68.182				704.683	3.12652			1344.12	3.59348				704.683	3.39486			682.241	4.32684			682.241	3.82344
		705.418	68.182				705.744	3.12653			1346.14	3.59349				705.744	3.39484			683.267	4.32679			683.267	3.82347
		706.479	68.1818				706.804	3.12653			1348.16	3.59348				706.804	3.39477			684.293	4.32679			684.293	3.82352
		707.54	68.1818				707.865	3.12647			1350.18	3.5935				707.865	3.39474			685.319	4.32679			685.319	3.82346
		708.6	68.1818				708.926	3.12651			1352.21	3.59351				708.926	3.3947			686.345	4.32679			686.345	3.82348
		709.662	68.1816				709.987	3.12651			1354.23	3.59356				709.987	3.39458			687.371	4.32679			687.371	3.82343
		710.722	68.1815				711.048	3.1265			1356.25	3.59358				711.048	3.39453			688.397	4.32679			688.397	3.82336
		711.784	68.1814				712.11	3.12653			1358.28	3.59349				712.11	3.39446			689.423	4.32679			689.423	3.82342
		712.844	68.1813				713.231	3.12647			1360.3	3.59347				713.231	3.39451			690.449	4.32684			690.449	3.82339
		713.905	68.1813				714.294	3.12642			1362.32	3.5935				714.294	3.39436			691.475	4.32679			691.475	3.82342
		714.966	68.1813				715.355	3.12647			1364.34	3.59355				715.355	3.39427			692.501	4.32674			692.501	3.82343
		716.026	68.1809				716.416	3.1265			1366.37	3.59357				716.416	3.39436			693.527	4.32674			693.527	3.82343
		717.087	68.1809				717.477	3.12641			1368.39	3.59352				717.477	3.39436			694.553	4.32679			694.553	3.82337
		718.147	68.1809				718.539	3.12647			1370.41	3.59349				718.539	3.3942			695.579	4.32674			695.579	3.8234
		719.208	68.1807				719.599	3.12647			1372.44	3.5935				719.599	3.39417			696.605	4.32674			696.605	3.82346
		720.269	68.1807				720.661	3.12646			1374.46	3.59361				720.661	3.39415			697.631	4.32669			697.631	3.8233
		721.329	68.1805				721.721	3.12651			1376.48	3.59354				721.721	3.39405			698.657	4.32669			698.657	3.82327
		722.389	68.1804				722.782	3.12652			1378.5	3.59357				722.782	3.39403			699.683	4.32664			699.683	3.82324
		723.449	68.1804				723.844	3.12643			1380.53	3.59348				723.844	3.39398			700.709	4.32664			700.709	3.82323
		724.51	68.1801				724.904	3.12641			1382.55	3.59354				724.904	3.394			701.735	4.32664			701.735	3.82315
		725.571	68.18				725.964	3.12642			1384.57	3.59352				725.964	3.39395			702.761	4.32659			702.761	3.82323
		726.632	68.1801				727.026	3.12643			1386.59	3.59348				727.026	3.394			703.787	4.32664			703.787	3.82319
		727.693	68.1799				728.087	3.12641			1388.62	3.59351				728.087	3.394			704.813	4.32654			704.813	3.82318
		728.813	68.1798				729.149	3.12647			1390.64	3.59353				729.149	3.39384			705.839	4.32659			705.839	3.82314
		729.873	68.1798				730.21	3.1264			1392.66	3.59345				730.21	3.39371			706.864	4.32659			706.864	3.82314
		730.933	68.1797				731.272	3.12639			1394.69	3.59345				731.272	3.39371			707.89	4.32654			707.89	3.8231
		731.995	68.1795				732.332	3.12639			1396.71	3.59349				732.332	3.3936			708.916	4.32654			708.916	3.8231
		733.056	68.1793				733.393	3.12642			1398.73	3.59355				733.393	3.39371			709.942	4.32654			709.942	3.82305
		734.116	68.1794				734.454	3.12646			1400.75	3.5936				734.454	3.3936			710.968	4.32649			710.968	3.82299
		735.176	68.1793				735.514	3.12637			1402.78	3.5937				735.514	3.39352			711.994	4.32649			711.994	3.82303
		736.237	68.1793				736.575	3.12642			1404.8	3.59368				736.575	3.39345			713.02	4.32654			713.02	3.82302
		737.297	68.1791				737.638	3.12637			1406.82	3.59368				737.638	3.39338			714.046	4.32649			714.046	3.82297
		738.357	68.179				738.699	3.12636			1408.85	3.59364				738.699	3.39343			715.072	4.32649			715.072	3.82292
		739.417	68.1787				739.761	3.12642			1410.87	3.59365				739.761	3.39331			716.098	4.32649			716.098	3.8229
		740.477	68.179				740.822	3.12638			1412.89	3.59362				740.822	3.39328			717.124	4.32649			717.124	3.82294
		741.537	68.1788				741.883	3.1264			1414.91	3.59364				741.883	3.39336			718.15	4.32644			718.15	3.82293
		742.597	68.1789				742.944	3.12642			1416.94	3.59365				742.944	3.39316			719.176	4.32644			719.176	3.82284
		743.658	68.1786				744.006	3.12641			1418.96	3.59352				744.006	3.39319			720.202	4.32644			720.202	3.82281
		744.719	68.1785				745.069	3.12633			1420.98	3.59354				745.069	3.39309			721.228	4.32644			721.228	3.82287
		745.779	68.1786				746.13	3.12631			1423	3.59347				746.13	3.39309			722.254	4.32644			722.254	3.82287
		746.839	68.1782				747.191	3.12634			1425.03	3.5935				747.191	3.39302			723.28	4.32639			723.28	3.8228
		747.9	68.1781				748.252	3.12635			1427.05	3.59353				748.252	3.39302			724.306	4.32639			724.306	3.8227
		748.96	68.178				749.314	3.12635			1429.07	3.59343				749.314	3.39305			725.332	4.32639			725.332	3.82274
		750.021	68.1781				750.376	3.12632			1431.1	3.59346				750.376	3.39288			726.358	4.32639			726.358	3.82273
		751.109	68.1781				751.437	3.12637			1433.12	3.59348				751.437	3.39293			727.384	4.32634			727.384	3.82268
		752.171	68.1777				752.498	3.12636			1435.14	3.59342				752.498	3.39297			728.41	4.32634			728.41	3.8227
		753.232	68.1777				753.559	3.12632			1437.16	3.59348				753.559	3.39286			729.436	4.32634			729.436	3.82268
		754.292	68.1776				754.621	3.1263			1439.19	3.59356				754.621	3.39288			730.462	4.32629			730.462	3.82273
		755.352	68.1775				755.71	3.12636			1441.21	3.59355				755.71	3.39276			731.488	4.32634			731.488	3.82266
		756.414	68.1773				756.771	3.12627			1443.23	3.59354				756.771	3.39278			732.514	4.32634			732.514	3.82268
		757.475	68.1774				757.833	3.1263			1445.26	3.59351				757.833	3.39278			733.54	4.32639			733.54	3.82273
		758.536	68.1773				758.894	3.12632			1447.28	3.59348				758.894	3.39271			734.566	4.32629			734.566	3.82269
		759.596	68.177				759.954	3.12633			1449.3	3.59354				759.954	3.39262			735.592	4.32634			735.592	3.82268
		760.657	68.1771				761.016	3.12632			1451.32	3.59349				761.016	3.39264			736.618	4.32629			736.618	3.82257
		761.719	68.1772				762.077	3.12627			1453.35	3.59353				762.077	3.39255			737.644	4.32634			737.644	3.82265
		762.779	68.1767				763.138	3.1263			1455.37	3.59356				763.138	3.39254			738.67	4.32629			738.67	3.82257
		763.84	68.1766				764.199	3.12627			1457.39	3.59355				764.199	3.39257			739.696	4.32629			739.696	3.82258
		764.901	68.1765				765.261	3.12629			1459.41	3.59354				765.261	3.39247			740.722	4.32629			740.722	3.8225
		765.961	68.1766				766.322	3.12629			1461.44	3.59355				766.322	3.3924			741.748	4.32624			741.748	3.82252
		767.022	68.1765				767.384	3.12628			1463.46	3.59348				767.384	3.39238			742.773	4.32624			742.773	3.82253
		768.083	68.1763				768.445	3.12626			1465.48	3.59356				768.445	3.39235			743.799	4.32624			743.799	3.82259
		769.219	68.1765				769.507	3.12629			1467.51	3.59357				769.507	3.3924			744.826	4.32619			744.826	3.82251
		770.279	68.1763				770.567	3.12624			1469.53	3.59363				770.567	3.39226			745.851	4.32619			745.851	3.82247
		771.339	68.1761				771.629	3.12627			1471.55	3.59348				771.629	3.39226			746.877	4.32619			746.877	3.82244
		772.4	68.1759				772.69	3.12627			1473.57	3.59352				772.69	3.39221			747.903	4.32614			747.903	3.82238
		773.46	68.1759				773.751	3.12627			1475.6	3.59352				773.751	3.39219			748.929	4.32614			748.929	3.82228
		774.521	68.1757				774.813	3.12627			1477.62	3.59344				774.813	3.3924			749.955	4.32614			749.955	3.82232
		775.581	68.1757				775.874	3.12629			1479.64	3.59355				775.874	3.39204			750.981	4.32614			750.981	3.82232
		776.642	68.1756				776.935	3.12625			1481.67	3.59348				776.935	3.39214			752.007	4.32609			752.007	3.82229
		777.704	68.1756				777.997	3.12625			1483.69	3.59352				777.997	3.39211			753.033	4.32604			753.033	3.82226
		778.765	68.1754				779.058	3.12625			1485.71	3.59357				779.058	3.39209			754.059	4.32609			754.059	3.82226
		779.826	68.1753				780.151	3.12624			1487.73	3.59383				780.151	3.39195			755.085	4.32604			755.085	3.82224
		780.887	68.1752				781.211	3.12622			1489.76	3.59392				781.211	3.39195			756.111	4.32604			756.111	3.8222
		781.948	68.175				782.273	3.1262			1491.78	3.5937				782.273	3.39202			757.137	4.32599			757.137	3.82234
		783.009	68.175				783.335	3.12621			1493.8	3.59378				783.335	3.39188			758.163	4.32599			758.163	3.82227
		784.07	68.1749				784.396	3.12627			1495.82	3.59391				784.396	3.39183			759.189	4.32599			759.189	3.82228
		785.132	68.1749				785.456	3.12619			1497.85	3.59382				785.456	3.39173			760.215	4.32594			760.215	3.82224
		786.192	68.1747				786.516	3.12621			1499.87	3.59383				786.516	3.3918			761.241	4.32594			761.241	3.82221
		787.252	68.1746				787.578	3.1262			1501.89	3.5938				787.578	3.39178			762.267	4.32594			762.267	3.82218
		788.313	68.1744				788.638	3.12624			1503.92	3.59406				788.638	3.39171			763.293	4.32594			763.293	3.82218
		789.374	68.1745				789.699	3.1262			1505.94	3.59411				789.699	3.39173			764.319	4.32599			764.319	3.82219
		790.435	68.1743				790.76	3.12616			1507.96	3.59407				790.76	3.39157			765.345	4.32589			765.345	3.82217
		791.496	68.1742				791.821	3.12615			1509.98	3.59414				791.821	3.39164			766.371	4.32589			766.371	3.82213
		792.557	68.1743				792.883	3.12615			1512.01	3.59417				792.883	3.39147			767.397	4.32589			767.397	3.82205
		793.619	68.174				793.945	3.12619			1514.03	3.5943				793.945	3.39154			768.423	4.32589			768.423	3.8221
		794.68	68.174				795.007	3.12616			1516.05	3.59433				795.007	3.3915			769.449	4.32589			769.449	3.82209
		795.772	68.1737				796.067	3.12616			1518.08	3.59427				796.067	3.3914			770.475	4.32584			770.475	3.82204
		796.833	68.1737				797.128	3.12613			1520.1	3.59427				797.128	3.39128			771.501	4.32584			771.501	3.82197
		797.894	68.1737				798.188	3.12609			1522.12	3.59437				798.188	3.3913			772.527	4.32589			772.527	3.82195
		798.954	68.1736				799.249	3.12607			1524.14	3.59465				799.249	3.3914			773.553	4.32584			773.553	3.82191
		800.014	68.1735				800.31	3.12615			1526.17	3.59462				800.31	3.39133			774.579	4.32584			774.579	3.82193
		801.074	68.1735				801.371	3.12609			1528.19	3.59464				801.371	3.39114			775.605	4.32579			775.605	3.82187
		802.134	68.1734				802.433	3.1261			1530.21	3.59463				802.433	3.39114			776.631	4.32579			776.631	3.82193
		803.194	68.1734				803.493	3.12609			1532.23	3.59472				803.493	3.39111			777.657	4.32574			777.657	3.82194
		804.255	68.1734				804.555	3.12609			1534.26	3.59486				804.555	3.39123			778.683	4.32569			778.683	3.82193
		805.316	68.1731				805.616	3.12612			1536.28	3.59482				805.616	3.39111			779.709	4.32574			779.709	3.82186
		806.378	68.173				806.719	3.1261			1538.3	3.59486				806.719	3.39114			780.735	4.32574			780.735	3.82183
		807.439	68.173				807.781	3.12606			1540.33	3.59492				807.781	3.39107			781.761	4.32574			781.761	3.82181
		808.499	68.1729				808.876	3.12608			1542.35	3.59506				808.876	3.39097			782.787	4.32574			782.787	3.8217
		809.56	68.1728				809.937	3.12604			1544.37	3.59487				809.937	3.3909			783.813	4.32569			783.813	3.8218
		810.621	68.1726				810.998	3.12605			1546.39	3.59511				810.998	3.39087			784.838	4.32569			784.838	3.82176
		811.682	68.1726				812.059	3.12604			1548.42	3.59509				812.059	3.39099			785.864	4.32564			785.864	3.82175
		812.743	68.1724				813.121	3.12603			1550.44	3.59517				813.121	3.3909			786.89	4.32564			786.89	3.82169
		813.803	68.1723				814.181	3.126			1552.46	3.59512				814.181	3.39101			787.916	4.32564			787.916	3.82173
		814.864	68.1723				815.242	3.12603			1554.49	3.59509				815.242	3.39087			788.942	4.32559			788.942	3.82175
		815.925	68.1721				816.302	3.12604			1556.51	3.59501				816.302	3.3908			789.968	4.32559			789.968	3.82177
		816.986	68.1722				817.364	3.126			1558.53	3.59507				817.364	3.39075			790.994	4.32564			790.994	3.82178
		818.072	68.172				818.425	3.12603			1560.55	3.59515				818.425	3.3908			792.02	4.32559			792.02	3.82173
		819.133	68.172				819.487	3.12598			1562.58	3.59521				819.487	3.39075			793.046	4.32564			793.046	3.82162
		820.192	68.1719				820.548	3.126			1564.6	3.59526				820.548	3.39066			794.072	4.32559			794.072	3.82165
		821.252	68.1718				821.61	3.12603			1566.62	3.59544				821.61	3.39071			795.098	4.32564			795.098	3.8216
		822.313	68.1717				822.671	3.12606			1568.64	3.59534				822.671	3.39073			796.124	4.32559			796.124	3.82157
		823.373	68.1715				823.733	3.126			1570.67	3.59531				823.733	3.39075			797.15	4.32554			797.15	3.82149
		824.433	68.1714				824.794	3.126			1572.69	3.59534				824.794	3.39073			798.176	4.32564			798.176	3.82155
		825.494	68.1714				825.856	3.12603			1574.71	3.5955				825.856	3.39044			799.202	4.32554			799.202	3.82159
		826.554	68.1712				826.917	3.12599			1576.74	3.59547				826.917	3.39059			800.228	4.32559			800.228	3.82155
		827.614	68.1712				827.978	3.12603			1578.76	3.59556				827.978	3.39061			801.254	4.32559			801.254	3.82155
		828.674	68.1713				829.109	3.12605			1580.78	3.5955				829.109	3.39056			802.28	4.32559			802.28	3.82156
		829.735	68.171				830.171	3.12601			1582.8	3.59552				830.171	3.39049			803.306	4.32554			803.306	3.82153
		830.796	68.1708				831.232	3.12599			1584.83	3.59558				831.232	3.39047			804.332	4.32554			804.332	3.82155
		831.857	68.1708				832.292	3.12604			1586.85	3.59552				832.292	3.39037			805.358	4.32554			805.358	3.82154
		832.918	68.1708				833.354	3.12599			1588.87	3.59546				833.354	3.39047			806.384	4.32554			806.384	3.82156
		833.979	68.1705				834.415	3.12601			1590.9	3.59551				834.415	3.39032			807.41	4.32559			807.41	3.82155
		835.04	68.1705				835.476	3.12601			1592.92	3.59554				835.476	3.39042			808.436	4.32554			808.436	3.82156
		836.101	68.1704				836.537	3.12597			1594.94	3.59569				836.537	3.39032			809.462	4.32559			809.462	3.82153
		837.162	68.1703				837.598	3.126			1596.96	3.59571				837.598	3.3903			810.488	4.32554			810.488	3.82149
		838.222	68.1703				838.66	3.12594			1598.99	3.59562				838.66	3.3903			811.514	4.32554			811.514	3.82143
		839.282	68.1703				839.721	3.12601			1601.01	3.59543				839.721	3.3903			812.54	4.32554			812.54	3.82148
		840.419	68.1702				840.781	3.12599			1603.03	3.59556				840.781	3.39018			813.566	4.32554			813.566	3.82151
		841.479	68.17				841.842	3.12596			1605.05	3.59562				841.842	3.39025			814.591	4.32549			814.591	3.82141
		842.54	68.1699				842.904	3.12594			1607.08	3.59566				842.904	3.39018			815.617	4.32554			815.617	3.82143
		843.6	68.1699				843.964	3.12598			1609.1	3.59554				843.964	3.39016			816.643	4.32549			816.643	3.82145
		844.661	68.1698				845.025	3.126			1611.12	3.59549				845.025	3.39025			817.669	4.32544			817.669	3.82136
		845.722	68.1698				846.087	3.12598			1613.15	3.59548				846.087	3.39001			818.695	4.32544			818.695	3.82138
		846.782	68.1694				847.148	3.12598			1615.17	3.59533				847.148	3.39008			819.721	4.32544			819.721	3.82141
		847.842	68.1694				848.209	3.12598			1617.19	3.5955				848.209	3.38999			820.747	4.32549			820.747	3.82144
		848.903	68.1694				849.339	3.12596			1619.21	3.59564				849.339	3.39006			821.773	4.32544			821.773	3.82141
		849.963	68.1693				850.401	3.12599			1621.24	3.59571				850.401	3.38992			822.799	4.32544			822.799	3.82139
		851.024	68.1691				851.463	3.12595			1623.26	3.59561				851.463	3.39001			823.825	4.32544			823.825	3.82132
		852.085	68.1692				852.524	3.12595			1625.28	3.59562				852.524	3.39006			824.851	4.32544			824.851	3.82135
		853.145	68.169				853.585	3.12594			1627.31	3.59569				853.585	3.38992			825.877	4.32539			825.877	3.82129
		854.205	68.169				854.647	3.12599			1629.33	3.59572				854.647	3.38989			826.903	4.32539			826.903	3.82125
		855.265	68.1688				855.707	3.12594			1631.35	3.59578				855.707	3.38999			827.929	4.32539			827.929	3.82119
		856.326	68.1687				856.769	3.12596			1633.37	3.59575				856.769	3.38992			828.955	4.32534			828.955	3.8212
		857.387	68.1686				857.83	3.12596			1635.4	3.59576				857.83	3.38992			829.981	4.32534			829.981	3.82116
		858.448	68.1684				858.891	3.12595			1637.42	3.59581				858.891	3.38985			831.007	4.32529			831.007	3.82118
		859.508	68.1685				859.951	3.12591			1639.44	3.59573				859.951	3.38989			832.033	4.32539			832.033	3.8212
		860.569	68.1684				861.012	3.12594			1641.46	3.59582				861.012	3.3898			833.059	4.32529			833.059	3.82114
		861.63	68.1684				862.073	3.12593			1643.49	3.59568				862.073	3.38973			834.085	4.32534			834.085	3.8212
		862.692	68.1684				863.134	3.12595			1645.51	3.59584				863.134	3.38973			835.111	4.32529			835.111	3.82116
		863.753	68.1683				864.196	3.12595			1647.53	3.59584				864.196	3.38973			836.137	4.32524			836.137	3.82119
		864.813	68.1681				865.257	3.1259			1649.56	3.59591				865.257	3.38966			837.163	4.32529			837.163	3.82113
		865.875	68.1681				866.318	3.12587			1651.58	3.59593				866.318	3.38963			838.189	4.32524			838.189	3.82114
		866.936	68.168				867.378	3.12594			1653.6	3.59586				867.378	3.38961			839.215	4.32529			839.215	3.82113
		867.996	68.1678				868.439	3.12593			1655.62	3.59588				868.439	3.38951			840.241	4.32524			840.241	3.82111
		869.057	68.1677				869.5	3.12592			1657.65	3.59584				869.5	3.38963			841.267	4.32524			841.267	3.8212
		870.117	68.1676				870.562	3.12596			1659.67	3.59603				870.562	3.38961			842.293	4.32519			842.293	3.82112
		871.177	68.1676				871.692	3.12589			1661.69	3.59612				871.692	3.38944			843.319	4.32524			843.319	3.82108
		872.238	68.1675				872.753	3.1259			1663.72	3.59607				872.753	3.38961			844.345	4.32524			844.345	3.82112
		873.298	68.1674				873.815	3.1259			1665.74	3.59601				873.815	3.38951			845.371	4.32519			845.371	3.8211
		874.36	68.1672				874.875	3.12589			1667.76	3.59602				874.875	3.38956			846.397	4.32524			846.397	3.82109
		875.421	68.1672				875.936	3.1259			1669.78	3.59598				875.936	3.38944			847.423	4.32519			847.423	3.82108
		876.482	68.1673				876.996	3.12589			1671.81	3.59596				876.996	3.38944			848.449	4.32519			848.449	3.82101
		877.542	68.167				878.059	3.12583			1673.83	3.59597				878.059	3.38934			849.475	4.32514			849.475	3.82104
		878.602	68.167				879.12	3.12585			1675.85	3.59608				879.12	3.38944			850.501	4.32514			850.501	3.82095
		879.662	68.167				880.18	3.12581			1677.88	3.59602				880.18	3.38935			851.527	4.32519			851.527	3.82094
		880.722	68.1668				881.243	3.1258			1679.9	3.59604				881.243	3.38939			852.553	4.32514			852.553	3.82091
		881.783	68.1667				882.304	3.12585			1681.92	3.59607				882.304	3.38939			853.579	4.32514			853.579	3.82092
		882.843	68.1668				883.366	3.12585			1683.94	3.59604				883.366	3.38939			854.604	4.32509			854.604	3.82094
		883.903	68.1665				884.428	3.12589			1685.97	3.59615				884.428	3.38927			855.631	4.32509			855.631	3.82094
		884.964	68.1666				885.489	3.12588			1687.99	3.59599				885.489	3.38932			856.656	4.32514			856.656	3.82097
		886.025	68.1663				886.551	3.12583			1690.01	3.59595				886.551	3.38922			857.682	4.32509			857.682	3.82099
		887.085	68.1663				887.612	3.12586			1692.03	3.59604				887.612	3.38925			858.708	4.32509			858.708	3.82098
		888.144	68.1662				888.674	3.12584			1694.06	3.59608				888.674	3.38932			859.734	4.32509			859.734	3.82094
		889.205	68.1663				889.734	3.12584			1696.08	3.5961				889.734	3.38923			860.76	4.32504			860.76	3.82095
		890.267	68.166				890.795	3.12582			1698.1	3.59611				890.795	3.38925			861.786	4.32504			861.786	3.8209
		891.327	68.1658				891.856	3.12579			1700.13	3.59605				891.856	3.38918			862.812	4.32504			862.812	3.82084
		892.387	68.1659				892.918	3.12583			1702.15	3.59617				892.918	3.38915			863.838	4.32504			863.838	3.82086
		893.447	68.1658				893.978	3.12577			1704.17	3.5962				893.978	3.38922			864.864	4.32499			864.864	3.82083
		894.507	68.1657				895.039	3.12577			1706.19	3.59594				895.039	3.38911			865.89	4.32494			865.89	3.82081
		895.568	68.1654				896.1	3.12585			1708.22	3.596				896.1	3.38917			866.916	4.32489			866.916	3.82089
		896.628	68.1656				897.16	3.12579			1710.24	3.59596				897.16	3.3891			867.942	4.32494			867.942	3.82089
		897.689	68.1656				898.222	3.1258			1712.26	3.596				898.222	3.38908			868.968	4.32494			868.968	3.82083
		898.75	68.1654				899.284	3.12578			1714.29	3.59615				899.284	3.38918			869.994	4.32494			869.994	3.82081
		899.811	68.1653				900.345	3.12579			1716.31	3.59615				900.345	3.38899			871.02	4.32499			871.02	3.82079
		900.871	68.1654				901.406	3.12573			1718.33	3.59621				901.406	3.38906			872.046	4.32494			872.046	3.82083
		901.932	68.1653				902.468	3.12579			1720.35	3.59616				902.468	3.38901			873.072	4.32499			873.072	3.82079
		902.993	68.165				903.528	3.12584			1722.38	3.59611				903.528	3.38898			874.098	4.32499			874.098	3.82077
		904.053	68.165				904.59	3.12584			1724.4	3.59611				904.59	3.38887			875.124	4.32484			875.124	3.82076
		905.114	68.1646				905.652	3.12585			1726.42	3.59634				905.652	3.38891			876.15	4.32494			876.15	3.82078
		906.178	68.1648				906.713	3.12578			1728.44	3.59634				906.713	3.38889			877.176	4.32484			877.176	3.82082
		907.239	68.1646				907.774	3.12579			1730.47	3.59636				907.774	3.38889			878.202	4.32484			878.202	3.82068
		908.299	68.1648				908.834	3.12574			1732.49	3.59642				908.834	3.38891			879.228	4.32484			879.228	3.82072
		909.36	68.1645				909.897	3.1257			1734.51	3.59663				909.897	3.38891			880.254	4.32484			880.254	3.8207
		910.421	68.1643				910.957	3.1257			1736.54	3.59668				910.957	3.38884			881.28	4.32474			881.28	3.82075
		911.481	68.1643				912.019	3.1257			1738.56	3.59662				912.019	3.38884			882.306	4.32479			882.306	3.82068
		912.542	68.1642				913.081	3.1257			1740.58	3.59685				913.081	3.38882			883.332	4.32479			883.332	3.82067
		913.603	68.1642				914.15	3.12572			1742.6	3.59667				914.15	3.38889			884.358	4.32474			884.358	3.82063
		914.664	68.1641				915.211	3.12565			1744.63	3.59658				915.211	3.38889			885.384	4.32469			885.384	3.82064
		915.725	68.1641				916.271	3.12569			1746.65	3.59666				916.271	3.38894			886.41	4.32474			886.41	3.8207
		916.786	68.1637				917.332	3.12568			1748.67	3.59673				917.332	3.38877			887.436	4.32474			887.436	3.82064
		917.846	68.1637				918.393	3.12565			1750.69	3.59678				918.393	3.38882			888.462	4.32469			888.462	3.82066
		918.907	68.1635				919.453	3.12568			1752.72	3.59665				919.453	3.3887			889.488	4.32464			889.488	3.82062
		919.968	68.1636				920.515	3.12562			1754.74	3.59678				920.515	3.38865			890.513	4.32464			890.513	3.82059
		921.028	68.1633				921.576	3.12565			1756.76	3.59684				921.576	3.38875			891.539	4.32464			891.539	3.82059
		922.17	68.1634				922.638	3.12569			1758.79	3.5968				922.638	3.38868			892.565	4.32464			892.565	3.82061
		923.232	68.1633				923.699	3.12568			1760.81	3.59692				923.699	3.3886			893.591	4.32459			893.591	3.82056
		924.292	68.1632				924.76	3.12568			1762.83	3.59707				924.76	3.3886			894.617	4.32459			894.617	3.82056
		925.354	68.1631				925.822	3.1257			1764.85	3.597				925.822	3.38865			895.643	4.32459			895.643	3.82052
		926.415	68.1631				926.883	3.12568			1766.88	3.59702				926.883	3.38877			896.669	4.32454			896.669	3.82055
		927.476	68.1628				927.944	3.1257			1768.9	3.59702				927.944	3.38853			897.695	4.32454			897.695	3.82048
		928.538	68.1628				929.006	3.12568			1770.92	3.59696				929.006	3.38851			898.721	4.32454			898.721	3.82052
		929.599	68.1627				930.068	3.12565			1772.95	3.59706				930.068	3.38844			899.747	4.32449			899.747	3.82051
		930.659	68.1626				931.13	3.12564			1774.97	3.59705				931.13	3.38848			900.773	4.32449			900.773	3.82051
		931.72	68.1626				932.19	3.12565			1776.99	3.59703				932.19	3.38848			901.799	4.32444			901.799	3.82048
		932.781	68.1625				933.252	3.12564			1779.01	3.59709				933.252	3.38848			902.825	4.32444			902.825	3.82051
		933.841	68.1626				934.313	3.12559			1781.04	3.59697				934.313	3.38834			903.851	4.32439			903.851	3.82047
		934.902	68.1621				935.374	3.1256			1783.06	3.59708				935.374	3.38836			904.877	4.32429			904.877	3.82048
		935.963	68.1621				936.436	3.1256			1785.08	3.59717				936.436	3.38832			905.903	4.32434			905.903	3.82041
		937.023	68.1621				937.497	3.12563			1787.1	3.59691				937.497	3.38829			906.929	4.32439			906.929	3.82042
		938.083	68.162				938.56	3.12557			1789.13	3.59717				938.56	3.38832			907.955	4.32434			907.955	3.82036
		939.144	68.162				939.62	3.12559			1791.15	3.59724				939.62	3.38831			908.981	4.32434			908.981	3.82039
		940.205	68.1618				940.684	3.12559			1793.17	3.59711				940.684	3.38836			910.007	4.32429			910.007	3.82044
		941.265	68.1616				941.746	3.12561			1795.2	3.59716				941.746	3.38827			911.033	4.32429			911.033	3.82042
		942.326	68.1617				942.807	3.12557			1797.22	3.59722				942.807	3.38824			912.059	4.32429			912.059	3.82039
		943.386	68.1616				943.868	3.12561			1799.24	3.59729				943.868	3.38831			913.085	4.32424			913.085	3.82045
		944.446	68.1618				944.93	3.12559			1801.26	3.59721				944.93	3.38831			914.111	4.32429			914.111	3.82043
		945.507	68.1615				945.99	3.12562			1803.29	3.59722				945.99	3.38827			915.137	4.32429			915.137	3.82042
		946.605	68.1613				947.051	3.12562			1805.31	3.59705				947.051	3.38831			916.163	4.32419			916.163	3.82049
		947.665	68.1612				948.111	3.12557			1807.33	3.5972				948.111	3.38827			917.189	4.32419			917.189	3.82043
		948.725	68.1612				949.172	3.12568			1809.36	3.59722				949.172	3.38817			918.215	4.32419			918.215	3.82039
		949.785	68.1611				950.234	3.1256			1811.38	3.59726				950.234	3.38815			919.241	4.32424			919.241	3.82043
		950.846	68.1609				951.296	3.12557			1813.4	3.59727				951.296	3.3882			920.267	4.32424			920.267	3.8204
		951.906	68.1609				952.357	3.12558			1815.42	3.59726				952.357	3.38815			921.293	4.32424			921.293	3.82041
		952.967	68.1608				953.418	3.12564			1817.45	3.59729				953.418	3.3882			922.319	4.32424			922.319	3.82038
		954.027	68.1608				954.479	3.12559			1819.47	3.5972				954.479	3.38819			923.345	4.32424			923.345	3.82037
		955.088	68.1608				955.54	3.12557			1821.49	3.59727				955.54	3.38817			924.371	4.32419			924.371	3.82033
		956.149	68.1606				956.601	3.12559			1823.52	3.59728				956.601	3.3881			925.397	4.32419			925.397	3.82036
		957.209	68.1604				957.662	3.12558			1825.54	3.59733				957.662	3.38803			926.423	4.32404			926.423	3.82032
		958.27	68.1602				958.723	3.12559			1827.56	3.59742				958.723	3.38805			927.449	4.32409			927.449	3.82024
		959.33	68.1603				959.784	3.12564			1829.58	3.59741				959.784	3.38815			928.475	4.32409			928.475	3.82029
		960.391	68.1602				960.846	3.12561			1831.61	3.59732				960.846	3.38803			929.501	4.32404			929.501	3.82028
		961.451	68.16				961.907	3.12557			1833.63	3.59741				961.907	3.38814			930.527	4.32404			930.527	3.82029
		962.512	68.1601				962.968	3.12558			1835.65	3.59722				962.968	3.388			931.553	4.32399			931.553	3.82029
		963.574	68.1598				964.03	3.12556			1837.67	3.5974				964.03	3.38805			932.579	4.32399			932.579	3.82024
		964.634	68.1596				965.092	3.12553			1839.7	3.59738				965.092	3.388			933.605	4.32404			933.605	3.82028
		965.694	68.1596				966.153	3.12557			1841.72	3.59743				966.153	3.38807			934.631	4.32394			934.631	3.82029
		966.755	68.1594				967.214	3.12554			1843.74	3.59739				967.214	3.38796			935.656	4.32399			935.656	3.82025
		967.816	68.1595				968.275	3.12553			1845.77	3.59748				968.275	3.38803			936.682	4.32394			936.682	3.82033
		968.876	68.1593				969.336	3.12557			1847.79	3.59741				969.336	3.38798			937.708	4.32394			937.708	3.82032
		969.936	68.1593				970.396	3.12557			1849.81	3.59739				970.396	3.38807			938.734	4.32394			938.734	3.82029
		970.998	68.1593				971.504	3.12553			1851.83	3.59729				971.504	3.38803			939.76	4.32389			939.76	3.82033
		972.059	68.1591				972.565	3.12548			1853.86	3.5972				972.565	3.38798			940.786	4.32384			940.786	3.82031
		973.121	68.1591				973.626	3.12551			1855.88	3.59741				973.626	3.38798			941.812	4.32389			941.812	3.82028
		974.181	68.1589				974.686	3.12551			1857.9	3.59743				974.686	3.38807			942.838	4.32384			942.838	3.82026
		975.242	68.1588				975.747	3.12548			1859.93	3.59736				975.747	3.38807			943.864	4.32379			943.864	3.82027
		976.302	68.1587				976.809	3.12543			1861.95	3.59745				976.809	3.388			944.89	4.32379			944.89	3.82028
		977.362	68.1585				977.87	3.12546			1863.97	3.5974				977.87	3.38779			945.916	4.32379			945.916	3.82033
		978.423	68.1586				978.932	3.12548			1865.99	3.59746				978.932	3.38791			946.942	4.32374			946.942	3.82027
		979.483	68.1584				979.993	3.12548			1868.02	3.59755				979.993	3.38791			947.968	4.32369			947.968	3.8202
		980.543	68.1584				981.056	3.12552			1870.04	3.59747				981.056	3.38781			948.994	4.32374			948.994	3.82018
		981.603	68.1583				982.117	3.12544			1872.06	3.5975				982.117	3.38791			950.02	4.32374			950.02	3.82024
		982.664	68.1582				983.179	3.12552			1874.08	3.59775				983.179	3.38786			951.046	4.32374			951.046	3.82028
		983.724	68.158				984.24	3.12553			1876.11	3.59761				984.24	3.38786			952.072	4.32369			952.072	3.82022
		984.871	68.1578				985.301	3.12557			1878.13	3.59759				985.301	3.38779			953.098	4.32369			953.098	3.82019
		985.931	68.1578				986.362	3.12553			1880.15	3.59763				986.362	3.38786			954.124	4.32374			954.124	3.82018
		986.992	68.1577				987.424	3.12553			1882.18	3.59757				987.424	3.38784			955.15	4.32364			955.15	3.82023
		988.053	68.1577				988.486	3.12553			1884.2	3.59771				988.486	3.38779			956.176	4.32364			956.176	3.8202
		989.112	68.1575				989.548	3.12551			1886.22	3.59777				989.548	3.38779			957.202	4.32364			957.202	3.82017
		990.172	68.1576				990.61	3.12542			1888.24	3.59781				990.61	3.38771			958.228	4.32359			958.228	3.82021
		991.232	68.1575				991.729	3.12543			1890.27	3.59777				991.729	3.38784			959.254	4.32359			959.254	3.82018
		992.292	68.1573				992.791	3.12543			1892.29	3.5979				992.791	3.38779			960.28	4.32359			960.28	3.8202
		993.353	68.1572				993.851	3.12544			1894.31	3.59773				993.851	3.38774			961.306	4.32354			961.306	3.82023
		994.415	68.1572				994.913	3.12547			1896.34	3.59781				994.913	3.38769			962.332	4.32359			962.332	3.82018
		995.475	68.157				995.974	3.12543			1898.36	3.59775				995.974	3.38757			963.358	4.32359			963.358	3.82012
		996.536	68.1569				997.036	3.12546			1900.38	3.59782				997.036	3.38748			964.384	4.32354			964.384	3.82019
		997.598	68.1568				998.097	3.12543			1902.4	3.59784				998.097	3.38757			965.41	4.32354			965.41	3.82013
		998.658	68.1567				999.157	3.12544			1904.43	3.59781				999.157	3.3876			966.436	4.32349			966.436	3.82015
		999.719	68.1567				1000.22	3.12547			1906.45	3.59785				1000.22	3.38752			967.462	4.32349			967.462	3.82012
		1000.78	68.1565				1001.28	3.12538			1908.47	3.59782				1001.28	3.38753			968.488	4.32349			968.488	3.82015
		1001.84	68.1566				1002.34	3.12547			1910.49	3.59791				1002.34	3.38753			969.514	4.32344			969.514	3.82008
		1002.9	68.1562				1003.4	3.12546			1912.52	3.59799				1003.4	3.38757			970.54	4.32344			970.54	3.82007
		1003.96	68.1561				1004.46	3.12546			1914.54	3.59781				1004.46	3.3875			971.566	4.32339			971.566	3.82001
		1005.1	68.1562				1005.52	3.12548			1916.56	3.59791				1005.52	3.38745			972.592	4.32339			972.592	3.82006
		1006.16	68.1559				1006.59	3.12547			1918.59	3.59797				1006.59	3.38745			973.618	4.32334			973.618	3.82003
		1007.22	68.1558				1007.65	3.12544			1920.61	3.5979				1007.65	3.38757			974.644	4.32329			974.644	3.82001
		1008.28	68.1557				1008.71	3.12544			1922.63	3.59784				1008.71	3.38745			975.67	4.32329			975.67	3.82006
		1009.34	68.1556				1009.77	3.12547			1924.65	3.59771				1009.77	3.3875			976.696	4.32334			976.696	3.81997
		1010.4	68.1554				1010.83	3.12543			1926.68	3.59792				1010.83	3.38738			977.722	4.32324			977.722	3.82006
		1011.46	68.1554				1011.89	3.12547			1928.7	3.59788				1011.89	3.38741			978.748	4.32324			978.748	3.82004
		1012.52	68.1554				1012.95	3.12543			1930.72	3.59798				1012.95	3.38741			979.774	4.32329			979.774	3.82004
		1013.58	68.1552				1014.01	3.12538			1932.75	3.59784				1014.01	3.38736			980.8	4.32324			980.8	3.82002
		1014.64	68.1552				1015.08	3.12538			1934.77	3.59787				1015.08	3.38745			981.826	4.32324			981.826	3.82004
		1015.7	68.1551				1016.15	3.12538			1936.79	3.59795				1016.15	3.38741			982.852	4.32324			982.852	3.82001
		1016.76	68.1549				1017.21	3.1254			1938.81	3.59795				1017.21	3.38741			983.878	4.32324			983.878	3.82001
		1017.82	68.1548				1018.28	3.12543			1940.84	3.598				1018.28	3.38719			984.904	4.32324			984.904	3.82002
		1018.89	68.1547				1019.34	3.12536			1942.86	3.5981				1019.34	3.38717			985.93	4.32324			985.93	3.81997
		1019.95	68.1546				1020.4	3.12538			1944.88	3.59802				1020.4	3.38748			986.956	4.32319			986.956	3.81994
		1021.01	68.1546				1021.46	3.12545			1946.9	3.59814				1021.46	3.38733			987.982	4.32319			987.982	3.81997
		1022.07	68.1545				1022.53	3.12543			1948.93	3.598				1022.53	3.38724			989.008	4.32319			989.008	3.81999
		1023.13	68.1546				1023.59	3.1254			1950.95	3.598				1023.59	3.38728			990.034	4.32319			990.034	3.81995
		1024.19	68.1543				1024.65	3.12538			1952.97	3.59795				1024.65	3.38733			991.06	4.32319			991.06	3.81997
		1025.25	68.1542				1025.71	3.12538			1955	3.598				1025.71	3.38728			992.086	4.32319			992.086	3.81999
		1026.31	68.1541				1026.77	3.12537			1957.02	3.59807				1026.77	3.38733			993.112	4.32314			993.112	3.81996
		1027.37	68.1541				1027.83	3.12542			1959.04	3.59828				1027.83	3.38719			994.137	4.32314			994.137	3.82002
		1028.43	68.154				1028.89	3.12536			1961.06	3.59825				1028.89	3.38721			995.163	4.32309			995.163	3.82007
		1029.49	68.1539				1029.96	3.12536			1963.09	3.59825				1029.96	3.38716			996.189	4.32304			996.189	3.82004
		1030.55	68.1538				1031.02	3.1254			1965.11	3.59828				1031.02	3.38717			997.215	4.32309			997.215	3.82013
		1031.61	68.1538				1032.08	3.12537			1967.13	3.59827				1032.08	3.38731			998.241	4.32304			998.241	3.82007
		1032.67	68.1538				1033.14	3.12541			1969.16	3.59823				1033.14	3.38733			999.267	4.32304			999.267	3.82011
		1033.81	68.1537				1034.2	3.12535			1971.18	3.59826				1034.2	3.38716			1000.29	4.32304			1000.29	3.82005
		1034.87	68.1538				1035.26	3.12536			1973.2	3.59828				1035.26	3.38721			1001.32	4.32304			1001.32	3.81998
		1035.93	68.1539				1036.32	3.12538			1975.22	3.59844				1036.32	3.38721			1002.35	4.32294			1002.35	3.81995
		1036.99	68.1538				1037.38	3.12538			1977.25	3.59852				1037.38	3.38724			1003.37	4.32294			1003.37	3.82001
		1038.06	68.1537				1038.44	3.12538			1979.27	3.59844				1038.44	3.38733			1004.4	4.32289			1004.4	3.82006
		1039.12	68.1537				1039.51	3.12534			1981.29	3.59845				1039.51	3.38726			1005.42	4.32289			1005.42	3.82001
		1040.18	68.1535				1040.57	3.12537			1983.31	3.59846				1040.57	3.38719			1006.45	4.32294			1006.45	3.81999
		1041.24	68.1533				1041.63	3.12536			1985.34	3.59845				1041.63	3.38719			1007.48	4.32284			1007.48	3.82001
		1042.3	68.1535				1042.69	3.12538			1987.36	3.59847				1042.69	3.38721			1008.5	4.32289			1008.5	3.82
		1043.36	68.1533				1043.75	3.12538			1989.38	3.59839				1043.75	3.38719			1009.53	4.32289			1009.53	3.82001
		1044.42	68.1531				1044.81	3.12539			1991.41	3.59846				1044.81	3.38724			1010.55	4.32294			1010.55	3.82004
		1045.48	68.1533				1045.87	3.12542			1993.43	3.59847				1045.87	3.38721			1011.58	4.32289			1011.58	3.82002
		1046.54	68.1531				1046.94	3.12534			1995.45	3.59851				1046.94	3.38721			1012.61	4.32289			1012.61	3.81997
		1047.6	68.1531				1048	3.12539			1997.47	3.5986				1048	3.38716			1013.63	4.32279			1013.63	3.82003
		1048.66	68.1531				1049.06	3.12542			1999.5	3.5986				1049.06	3.38717			1014.66	4.32284			1014.66	3.82001
		1049.72	68.153				1050.12	3.12542			2001.52	3.59851				1050.12	3.38712			1015.68	4.32284			1015.68	3.81999
		1050.78	68.1529				1051.18	3.12539			2003.54	3.5986				1051.18	3.38712			1016.71	4.32284			1016.71	3.81987
		1051.84	68.1528				1052.24	3.12535			2005.57	3.5984				1052.24	3.38709			1017.74	4.32279			1017.74	3.81991
		1052.9	68.1528				1053.3	3.1254			2007.59	3.59859				1053.3	3.38716			1018.76	4.32274			1018.76	3.81982
		1053.96	68.1528				1054.36	3.12538			2009.61	3.59858				1054.36	3.38709			1019.79	4.32274			1019.79	3.81988
		1055.02	68.1526				1055.42	3.12542			2011.63	3.59856				1055.42	3.38709			1020.81	4.32269			1020.81	3.8199
		1056.09	68.1525				1056.49	3.12535			2013.66	3.59848				1056.49	3.38709			1021.84	4.32274			1021.84	3.81985
		1057.15	68.1525				1057.55	3.12534			2015.68	3.59853				1057.55	3.38719			1022.86	4.32274			1022.86	3.81985
		1058.25	68.1523				1058.61	3.12538			2017.7	3.59848				1058.61	3.38705			1023.89	4.32269			1023.89	3.81982
		1059.31	68.1522				1059.67	3.12536			2019.72	3.59849				1059.67	3.38707			1024.92	4.32274			1024.92	3.81979
		1060.37	68.1522				1060.73	3.1253			2021.75	3.59847				1060.73	3.38709			1025.94	4.32264			1025.94	3.81979
		1061.43	68.1518				1061.79	3.12527			2023.77	3.59842				1061.79	3.387			1026.97	4.32259			1026.97	3.81982
		1062.49	68.1518				1062.86	3.12531			2025.79	3.59842				1062.86	3.38705			1027.99	4.32259			1027.99	3.81975
		1063.55	68.1516				1063.92	3.12532			2027.82	3.59843				1063.92	3.38704			1029.02	4.32254			1029.02	3.8198
		1064.61	68.1517				1064.98	3.12528			2029.84	3.59825				1064.98	3.38704			1030.05	4.32249			1030.05	3.81976
		1065.67	68.1517				1066.04	3.12531			2031.86	3.59832				1066.04	3.38714			1031.07	4.32254			1031.07	3.81979
		1066.73	68.1517				1067.1	3.1253			2033.88	3.59834				1067.1	3.38705			1032.1	4.32249			1032.1	3.81975
		1067.79	68.1515				1068.16	3.12532			2035.91	3.59838				1068.16	3.38702			1033.12	4.32254			1033.12	3.8198
		1068.85	68.1513				1069.23	3.12527			2037.93	3.59842				1069.23	3.38702			1034.15	4.32254			1034.15	3.81985
		1069.91	68.1512				1070.3	3.12527			2039.95	3.59833				1070.3	3.387			1035.18	4.32249			1035.18	3.81989
		1070.97	68.1512				1071.36	3.12531			2041.98	3.59827				1071.36	3.38693			1036.2	4.32249			1036.2	3.81987
		1072.03	68.1509				1072.42	3.12536			2044	3.59836				1072.42	3.387			1037.23	4.32234			1037.23	3.81978
		1073.09	68.1509				1073.48	3.12527			2046.02	3.59831				1073.48	3.38709			1038.25	4.32244			1038.25	3.81986
		1074.15	68.151				1074.54	3.1253			2048.04	3.59835				1074.54	3.38704			1039.28	4.32239			1039.28	3.81982
		1075.22	68.1508				1075.6	3.12527			2050.07	3.5983				1075.6	3.38695			1040.31	4.32244			1040.31	3.81985
		1076.28	68.1508				1076.66	3.12525			2052.09	3.59821				1076.66	3.38695			1041.33	4.32239			1041.33	3.81975
		1077.34	68.1506				1077.72	3.12532			2054.11	3.59817				1077.72	3.38695			1042.36	4.32244			1042.36	3.8198
		1078.4	68.1504				1078.78	3.12523			2056.13	3.59815				1078.78	3.38695			1043.38	4.32234			1043.38	3.81981
		1079.46	68.1505				1079.84	3.12526			2058.16	3.59806				1079.84	3.38685			1044.41	4.32234			1044.41	3.81985
		1080.52	68.1506				1080.91	3.12527			2060.18	3.59805				1080.91	3.38688			1045.44	4.32234			1045.44	3.81985
		1081.58	68.1504				1081.97	3.12527			2062.2	3.59799				1081.97	3.38683			1046.46	4.32234			1046.46	3.81984
		1082.66	68.1502				1083.03	3.12527			2064.23	3.59804				1083.03	3.38678			1047.49	4.32234			1047.49	3.81981
		1083.72	68.1502				1084.09	3.12522			2066.25	3.59798				1084.09	3.38678			1048.51	4.32229			1048.51	3.81983
		1084.78	68.1502				1085.15	3.12523			2068.27	3.59804				1085.15	3.38681			1049.54	4.32224			1049.54	3.81984
		1085.85	68.1501				1086.21	3.12521			2070.29	3.59798				1086.21	3.38683			1050.57	4.32224			1050.57	3.81976
		1086.91	68.1499				1087.27	3.12521			2072.32	3.598				1087.27	3.38671			1051.59	4.32224			1051.59	3.81982
		1087.97	68.1499				1088.33	3.12521			2074.34	3.59804				1088.33	3.38683			1052.62	4.32224			1052.62	3.81986
		1089.03	68.1499				1089.39	3.12523			2076.36	3.59796				1089.39	3.38678			1053.64	4.32219			1053.64	3.81979
		1090.09	68.1499				1090.46	3.12522			2078.39	3.59787				1090.46	3.38678			1054.67	4.32219			1054.67	3.81978
		1091.15	68.1497				1091.58	3.12521			2080.41	3.5979				1091.58	3.38678			1055.7	4.32214			1055.7	3.81982
		1092.21	68.1497				1092.64	3.12518			2082.43	3.59782				1092.64	3.38666			1056.72	4.32219			1056.72	3.81979
		1093.27	68.1496				1093.74	3.12521			2084.45	3.59778				1093.74	3.38661			1057.75	4.32209			1057.75	3.81977
		1094.33	68.1494				1094.8	3.12521			2086.48	3.59788				1094.8	3.38666			1058.77	4.32209			1058.77	3.81972
		1095.39	68.1493				1095.86	3.12527			2088.5	3.59791				1095.86	3.38669			1059.8	4.32204			1059.8	3.81972
		1096.45	68.1491				1096.92	3.12525			2090.52	3.59784				1096.92	3.38661			1060.83	4.32204			1060.83	3.81974
		1097.51	68.1492				1097.98	3.12522			2092.54	3.59778				1097.98	3.38671			1061.85	4.32199			1061.85	3.8197
		1098.57	68.149				1099.04	3.12526			2094.57	3.59775				1099.04	3.38659			1062.88	4.32194			1062.88	3.81977
		1099.63	68.1492				1100.1	3.12521			2096.59	3.59769				1100.1	3.38661			1063.9	4.32194			1063.9	3.8197
		1100.78	68.1489				1101.16	3.1252			2098.61	3.59759				1101.16	3.38676			1064.93	4.32194			1064.93	3.81973
		1101.84	68.1487				1102.23	3.12523			2100.64	3.59757				1102.23	3.38664			1065.96	4.32199			1065.96	3.8198
		1102.9	68.1486				1103.29	3.12523			2102.66	3.59767				1103.29	3.38654			1066.98	4.32199			1066.98	3.81982
		1103.96	68.1486				1104.35	3.12518			2104.68	3.59764				1104.35	3.38666			1068.01	4.32194			1068.01	3.81973
		1105.02	68.1485				1105.41	3.12518			2106.7	3.5977				1105.41	3.38666			1069.03	4.32184			1069.03	3.81982
		1106.08	68.1484				1106.47	3.12517			2108.73	3.59757				1106.47	3.38657			1070.06	4.32174			1070.06	3.81975
		1107.14	68.1482				1107.53	3.12518			2110.75	3.59764				1107.53	3.38661			1071.09	4.32169			1071.09	3.8198
		1108.2	68.1481				1108.59	3.12518			2112.77	3.59758				1108.59	3.38656			1072.11	4.32169			1072.11	3.81977
		1109.26	68.1482				1109.65	3.12515			2114.8	3.59756				1109.65	3.38652			1073.14	4.32169			1073.14	3.8198
		1110.32	68.1482				1110.71	3.12521			2116.82	3.59755				1110.71	3.38654			1074.16	4.32164			1074.16	3.81974
		1111.38	68.148				1111.78	3.12515			2118.84	3.59757				1111.78	3.38654			1075.19	4.32164			1075.19	3.81974
		1112.44	68.1479				1112.84	3.12518			2120.86	3.59747				1112.84	3.38659			1076.22	4.32164			1076.22	3.8198
		1113.5	68.1477				1113.9	3.12517			2122.89	3.59762				1113.9	3.38659			1077.24	4.32159			1077.24	3.8197
		1114.57	68.1476				1114.96	3.12519			2124.91	3.59746				1114.96	3.38659			1078.27	4.32159			1078.27	3.81981
		1115.63	68.1477				1116.02	3.12514			2126.93	3.59744				1116.02	3.38654			1079.29	4.32154			1079.29	3.81979
		1116.69	68.1476				1117.08	3.12514			2128.95	3.59747				1117.08	3.38647			1080.32	4.32169			1080.32	3.81974
		1117.75	68.1475				1118.14	3.12519			2130.98	3.59748				1118.14	3.38657			1081.35	4.32159			1081.35	3.81976
		1118.87	68.1475				1119.2	3.12512			2133	3.59733				1119.2	3.38652			1082.37	4.32159			1082.37	3.81972
		1119.93	68.1474				1120.27	3.12511			2135.02	3.59736				1120.27	3.38654			1083.4	4.32164			1083.4	3.81966
		1120.99	68.1472				1121.33	3.12512			2137.05	3.59739				1121.33	3.38654			1084.42	4.32149			1084.42	3.81968
		1122.05	68.1472				1122.39	3.1251			2139.07	3.59734				1122.39	3.38664			1085.45	4.32149			1085.45	3.81969
		1123.11	68.1471				1123.45	3.1251			2141.09	3.59737				1123.45	3.38649			1086.48	4.32149			1086.48	3.81972
		1124.17	68.147				1124.51	3.12512			2143.11	3.5973				1124.51	3.38652			1087.5	4.32149			1087.5	3.81965
		1125.23	68.1469				1125.57	3.12512			2145.14	3.59731				1125.57	3.38652			1088.53	4.32144			1088.53	3.81971
		1126.3	68.1468				1126.64	3.12519			2147.16	3.59726				1126.64	3.38652			1089.55	4.32139			1089.55	3.81966
		1127.36	68.1468				1127.7	3.12512			2149.18	3.59732				1127.7	3.38647			1090.58	4.32144			1090.58	3.81969
		1128.42	68.1467				1128.76	3.12511			2151.21	3.5972				1128.76	3.3863			1091.61	4.32134			1091.61	3.81967
		1129.48	68.1467				1129.82	3.1251			2153.23	3.59724				1129.82	3.38652			1092.63	4.32134			1092.63	3.81968
		1130.54	68.1465				1130.88	3.1251			2155.25	3.59724				1130.88	3.38645			1093.66	4.32134			1093.66	3.81969
		1131.6	68.1465				1131.94	3.12512			2157.27	3.59718				1131.94	3.38635			1094.68	4.32129			1094.68	3.81966
		1132.66	68.1465				1133	3.12512			2159.3	3.59724				1133	3.38642			1095.71	4.32134			1095.71	3.81966
		1133.72	68.1464				1134.1	3.12517			2161.32	3.59725				1134.1	3.38637			1096.74	4.32124			1096.74	3.81969
		1134.78	68.1462				1135.16	3.12504			2163.34	3.5972				1135.16	3.3863			1097.76	4.32124			1097.76	3.81972
		1135.84	68.1462				1136.22	3.12512			2165.36	3.59716				1136.22	3.38642			1098.79	4.32124			1098.79	3.81967
		1136.9	68.1459				1137.28	3.12509			2167.39	3.59713				1137.28	3.3863			1099.81	4.32119			1099.81	3.81966
		1137.96	68.1461				1138.34	3.12512			2169.41	3.59711				1138.34	3.3863			1100.84	4.32119			1100.84	3.81965
		1139.02	68.1457				1139.4	3.12506			2171.43	3.59713				1139.4	3.38623			1101.87	4.32124			1101.87	3.81964
		1140.08	68.1458				1140.47	3.12504			2173.46	3.59725				1140.47	3.38635			1102.89	4.32124			1102.89	3.81959
		1141.14	68.1456				1141.53	3.1251			2175.48	3.59702				1141.53	3.3863			1103.92	4.32124			1103.92	3.81959
		1142.2	68.1455				1142.59	3.12509			2177.5	3.59708				1142.59	3.38642			1104.94	4.32119			1104.94	3.81956
		1143.27	68.1455				1143.65	3.12509			2179.52	3.5971				1143.65	3.38628			1105.97	4.32124			1105.97	3.81964
		1144.33	68.1455				1144.71	3.12504			2181.55	3.5971				1144.71	3.3863			1107	4.32119			1107	3.81965
		1145.39	68.1454				1145.77	3.12509			2183.57	3.59703				1145.77	3.3863			1108.02	4.32114			1108.02	3.81967
		1146.45	68.1453				1146.83	3.12511			2185.59	3.59703				1146.83	3.38623			1109.05	4.32109			1109.05	3.81962
		1147.51	68.1452				1147.89	3.1251			2187.62	3.59705				1147.89	3.38621			1110.07	4.32109			1110.07	3.81967
		1148.57	68.1451				1148.95	3.12501			2189.64	3.59695				1148.95	3.38628			1111.1	4.32114			1111.1	3.81958
		1149.63	68.1451				1150.02	3.12509			2191.66	3.59695				1150.02	3.38628			1112.13	4.32109			1112.13	3.81953
		1150.69	68.145				1151.08	3.1251			2193.68	3.59698				1151.08	3.38623			1113.15	4.32104			1113.15	3.81948
		1151.75	68.1448				1152.14	3.12505			2195.71	3.59706				1152.14	3.38621			1114.18	4.32104			1114.18	3.81958
		1152.81	68.145				1153.2	3.12504			2197.73	3.5969				1153.2	3.38621			1115.2	4.32099			1115.2	3.81956
		1153.87	68.1448				1154.26	3.12509			2199.75	3.5969				1154.26	3.38621			1116.23	4.32109			1116.23	3.81959
		1154.93	68.1447				1155.32	3.12511			2201.77	3.59691				1155.32	3.38621			1117.26	4.32094			1117.26	3.81961
		1155.99	68.1447				1156.38	3.12509			2203.8	3.59695				1156.38	3.38621			1118.28	4.32094			1118.28	3.81958
		1157.05	68.1444				1157.44	3.12509			2205.82	3.59688				1157.44	3.38618			1119.31	4.32094			1119.31	3.81956
		1158.11	68.1445				1158.52	3.12508			2207.84	3.59688				1158.52	3.38621			1120.33	4.32094			1120.33	3.81957
		1159.17	68.1443				1159.58	3.12504			2209.87	3.59682				1159.58	3.38614			1121.36	4.32089			1121.36	3.81965
		1160.23	68.1443				1160.64	3.12506			2211.89	3.59682				1160.64	3.38606			1122.39	4.32089			1122.39	3.81958
		1161.29	68.1441				1161.7	3.12505			2213.91	3.59683				1161.7	3.38625			1123.41	4.32084			1123.41	3.81961
		1162.35	68.1441				1162.77	3.12508			2215.93	3.59676				1162.77	3.38623			1124.44	4.32089			1124.44	3.81961
		1163.41	68.1441				1163.83	3.12505			2217.96	3.59667				1163.83	3.38613			1125.46	4.32079			1125.46	3.81956
		1164.47	68.144				1164.89	3.12506			2219.98	3.59661				1164.89	3.38608			1126.49	4.32084			1126.49	3.81951
		1165.54	68.1439				1165.95	3.12505			2222	3.59662				1165.95	3.3862			1127.52	4.32074			1127.52	3.8196
		1166.6	68.1436				1167.01	3.12509			2224.03	3.59661				1167.01	3.38613			1128.54	4.32069			1128.54	3.81951
		1167.69	68.1437				1168.07	3.12505			2226.05	3.59663				1168.07	3.38604			1129.57	4.32069			1129.57	3.81948
		1168.75	68.1437				1169.13	3.12504			2228.07	3.59659				1169.13	3.38606			1130.59	4.32069			1130.59	3.81956
		1169.81	68.1437				1170.19	3.125			2230.09	3.5965				1170.19	3.38609			1131.62	4.32069			1131.62	3.81956
		1170.87	68.1437				1171.25	3.12504			2232.12	3.59654				1171.25	3.38611			1132.65	4.32069			1132.65	3.81948
		1171.93	68.1436				1172.31	3.12505			2234.14	3.59647				1172.31	3.38606			1133.67	4.32064			1133.67	3.81957
		1172.99	68.1434				1173.38	3.12501			2236.16	3.59642				1173.38	3.38604			1134.7	4.32064			1134.7	3.81951
		1174.05	68.1433				1174.44	3.12504			2238.18	3.59644				1174.44	3.38601			1135.72	4.32064			1135.72	3.81952
		1175.11	68.1435				1175.5	3.12506			2240.21	3.59646				1175.5	3.38611			1136.75	4.32059			1136.75	3.8195
		1176.17	68.1433				1176.56	3.12505			2242.23	3.59648				1176.56	3.38601			1137.78	4.32059			1137.78	3.8195
		1177.24	68.1431				1177.62	3.12504			2244.25	3.59638				1177.62	3.38604			1138.8	4.32054			1138.8	3.81954
		1178.3	68.143				1178.68	3.12501			2246.28	3.59637				1178.68	3.38604			1139.83	4.32054			1139.83	3.81956
		1179.36	68.1428				1179.74	3.12506			2248.3	3.59626				1179.74	3.38594			1140.85	4.32044			1140.85	3.81949
		1180.42	68.143				1180.88	3.12499			2250.32	3.5963				1180.88	3.38601			1141.88	4.32044			1141.88	3.8195
		1181.48	68.1429				1181.94	3.125			2252.34	3.59623				1181.94	3.38594			1142.91	4.32039			1142.91	3.81952
		1182.54	68.1427				1183	3.125			2254.37	3.59636				1183	3.38597			1143.93	4.32044			1143.93	3.81947
		1183.6	68.1426				1184.06	3.12504			2256.39	3.59637				1184.06	3.38597			1144.96	4.32039			1144.96	3.81948
		1184.66	68.1427				1185.13	3.12497			2258.41	3.59635				1185.13	3.38601			1145.98	4.32044			1145.98	3.81957
		1185.72	68.1426				1186.19	3.12497			2260.44	3.59625				1186.19	3.38594			1147.01	4.32034			1147.01	3.81951
		1186.78	68.1425				1187.25	3.12497			2262.46	3.59615				1187.25	3.3859			1148.03	4.32034			1148.03	3.81955
		1187.84	68.1423				1188.31	3.12495			2264.48	3.59608				1188.31	3.38587			1149.06	4.32034			1149.06	3.8195
		1188.9	68.1422				1189.37	3.12504			2266.5	3.59618				1189.37	3.38594			1150.09	4.32029			1150.09	3.81957
		1189.96	68.1424				1190.43	3.12505			2268.53	3.59611				1190.43	3.38592			1151.11	4.32029			1151.11	3.81959
		1191.02	68.1421				1191.49	3.12506			2270.55	3.59604				1191.49	3.38594			1152.14	4.32029			1152.14	3.81952
		1192.08	68.1422				1192.55	3.12501			2272.57	3.59602				1192.55	3.38585			1153.17	4.32029			1153.17	3.81943
		1193.14	68.1421				1193.61	3.125			2274.59	3.59599				1193.61	3.3858			1154.19	4.32029			1154.19	3.81952
		1194.26	68.1419				1194.67	3.12497			2276.62	3.59585				1194.67	3.3858			1155.22	4.32029			1155.22	3.81947
		1195.32	68.1419				1195.73	3.125			2278.64	3.59578				1195.73	3.38578			1156.24	4.32024			1156.24	3.81949
		1196.38	68.1418				1196.8	3.125			2280.66	3.59574				1196.8	3.38573			1157.27	4.32014			1157.27	3.81947
		1197.44	68.1417				1197.86	3.12501			2282.69	3.59578				1197.86	3.38577			1158.29	4.32019			1158.29	3.81941
		1198.5	68.1418				1198.92	3.12499			2284.71	3.59578				1198.92	3.3857			1159.32	4.32019			1159.32	3.8195
		1199.56	68.1416				1199.98	3.12501			2286.73	3.59582				1199.98	3.38573			1160.35	4.32009			1160.35	3.81947
		1200.62	68.1415				1201.04	3.125			2288.75	3.59576				1201.04	3.38573			1161.37	4.32004			1161.37	3.81943
		1201.68	68.1414				1202.1	3.12504			2290.78	3.59566				1202.1	3.38573			1162.4	4.32009			1162.4	3.81949
		1202.74	68.1414				1203.2	3.12504			2292.8	3.5957				1203.2	3.38578			1163.42	4.32004			1163.42	3.81948
		1203.8	68.1413				1204.26	3.12509			2294.82	3.59562				1204.26	3.38585			1164.45	4.32004			1164.45	3.81947
		1204.86	68.1412				1205.33	3.12504			2296.85	3.59563				1205.33	3.38561			1165.48	4.32004			1165.48	3.81959
		1205.92	68.141				1206.39	3.12501			2298.87	3.59556				1206.39	3.3857			1166.5	4.31994			1166.5	3.81956
		1206.98	68.1409				1207.45	3.12504			2300.89	3.59557				1207.45	3.38568			1167.53	4.31994			1167.53	3.8195
		1208.04	68.141				1208.51	3.12495			2302.91	3.59553				1208.51	3.38568			1168.55	4.31994			1168.55	3.81945
		1209.11	68.141				1209.57	3.12504			2304.94	3.59547				1209.57	3.38556			1169.58	4.31989			1169.58	3.81944
		1210.17	68.1409				1210.63	3.12496			2306.96	3.59541				1210.63	3.38568			1170.61	4.31984			1170.61	3.81942
		1211.23	68.1409				1211.69	3.12494			2308.98	3.59542				1211.69	3.38563			1171.63	4.31984			1171.63	3.81943
		1212.29	68.1408				1212.75	3.12499			2311	3.59546				1212.75	3.38558			1172.66	4.31979			1172.66	3.81943
		1213.35	68.1408				1213.81	3.12494			2313.03	3.59543				1213.81	3.38551			1173.68	4.31984			1173.68	3.81951
		1214.41	68.1407				1214.87	3.12496			2315.05	3.59555				1214.87	3.38554			1174.71	4.31984			1174.71	3.81934
		1215.47	68.1406				1215.93	3.12494			2317.07	3.59543				1215.93	3.38554			1175.74	4.31974			1175.74	3.81933
		1216.53	68.1404				1216.99	3.125			2319.1	3.59542				1216.99	3.38561			1176.76	4.31979			1176.76	3.81946
		1217.59	68.1404				1218.06	3.12492			2321.12	3.59548				1218.06	3.38556			1177.79	4.31974			1177.79	3.81943
		1218.65	68.1402				1219.12	3.12499			2323.14	3.59534				1219.12	3.38561			1178.81	4.31979			1178.81	3.81934
		1219.71	68.1403				1220.18	3.12491			2325.16	3.59539				1220.18	3.38551			1179.84	4.31974			1179.84	3.81931
		1220.81	68.1402				1221.24	3.12501			2327.19	3.59532				1221.24	3.38553			1180.87	4.31974			1180.87	3.81928
		1221.87	68.1401				1222.3	3.12496			2329.21	3.59531				1222.3	3.38546			1181.89	4.31969			1181.89	3.81926
		1222.93	68.1399				1223.36	3.12495			2331.23	3.59531				1223.36	3.38553			1182.92	4.31974			1182.92	3.81924
		1223.99	68.1401				1224.42	3.12494			2333.26	3.59518				1224.42	3.38556			1183.94	4.31969			1183.94	3.8193
		1225.05	68.1399				1225.48	3.12492			2335.28	3.59528				1225.48	3.38551			1184.97	4.31959			1184.97	3.8193
		1226.11	68.1399				1226.54	3.12497			2337.3	3.59525				1226.54	3.38554			1186	4.31964			1186	3.8193
		1227.17	68.1399				1227.61	3.12494			2339.32	3.59521				1227.61	3.38546			1187.02	4.31969			1187.02	3.8193
		1228.23	68.1396				1228.67	3.12491			2341.35	3.59513				1228.67	3.38556			1188.05	4.31959			1188.05	3.81931
		1229.29	68.1396				1229.73	3.12491			2343.37	3.59514				1229.73	3.38553			1189.07	4.31954			1189.07	3.81926
		1230.35	68.1396				1230.79	3.12491			2345.39	3.59513				1230.79	3.38546			1190.1	4.31959			1190.1	3.81923
		1231.42	68.1396				1231.85	3.12494			2347.41	3.5951				1231.85	3.38551			1191.13	4.31954			1191.13	3.81923
		1232.48	68.1395				1232.91	3.12497			2349.44	3.59507				1232.91	3.38554			1192.15	4.31959			1192.15	3.81927
		1233.54	68.1394				1234.03	3.12494			2351.46	3.59499				1234.03	3.38546			1193.18	4.31954			1193.18	3.81925
		1234.6	68.1392				1235.09	3.12491			2353.48	3.59501				1235.09	3.38539			1194.2	4.31954			1194.2	3.81931
		1235.66	68.1392				1236.16	3.12491			2355.51	3.59499				1236.16	3.38551			1195.23	4.31949			1195.23	3.81928
		1236.72	68.1393				1237.22	3.12493			2357.53	3.59486				1237.22	3.38544			1196.26	4.31944			1196.26	3.81932
		1237.78	68.1391				1238.28	3.12489			2359.55	3.59485				1238.28	3.38542			1197.28	4.31949			1197.28	3.81925
		1238.84	68.1391				1239.34	3.12491			2361.57	3.59489				1239.34	3.38544			1198.31	4.31939			1198.31	3.81928
		1239.9	68.1389				1240.4	3.12489			2363.6	3.59483				1240.4	3.38546			1199.33	4.31939			1199.33	3.81931
		1240.96	68.1391				1241.46	3.12492			2365.62	3.59491				1241.46	3.38549			1200.36	4.31939			1200.36	3.81929
		1242.02	68.139				1242.52	3.12489			2367.64	3.59484				1242.52	3.38539			1201.39	4.31939			1201.39	3.81932
		1243.09	68.1389				1243.58	3.12488			2369.67	3.59484				1243.58	3.38546			1202.41	4.31934			1202.41	3.8193
		1244.15	68.1388				1244.64	3.12485			2371.69	3.59481				1244.64	3.38539			1203.44	4.31934			1203.44	3.81934
		1245.21	68.1387				1245.71	3.12487			2373.71	3.59479				1245.71	3.38544			1204.46	4.31934			1204.46	3.8193
		1246.27	68.1388				1246.77	3.12492			2375.73	3.59477				1246.77	3.38534			1205.49	4.31929			1205.49	3.81926
		1247.34	68.1388				1247.83	3.12494			2377.76	3.59475				1247.83	3.38535			1206.52	4.31929			1206.52	3.81927
		1248.4	68.1387				1248.89	3.12487			2379.78	3.59468				1248.89	3.38535			1207.54	4.31934			1207.54	3.81926
		1249.46	68.1385				1249.95	3.12482			2381.8	3.59468				1249.95	3.38527			1208.57	4.31924			1208.57	3.81927
		1250.52	68.1385				1251.01	3.12482			2383.82	3.5948				1251.01	3.38527			1209.59	4.31924			1209.59	3.81927
		1251.58	68.1385				1252.07	3.12489			2385.85	3.59474				1252.07	3.38527			1210.62	4.31924			1210.62	3.81928
		1252.64	68.1384				1253.14	3.12485			2387.87	3.59464				1253.14	3.38527			1211.65	4.31924			1211.65	3.81928
		1253.7	68.1382				1254.2	3.12491			2389.89	3.59466				1254.2	3.38523			1212.67	4.31924			1212.67	3.81932
		1254.76	68.1383				1255.26	3.12485			2391.92	3.59466				1255.26	3.3853			1213.7	4.31924			1213.7	3.81923
		1255.82	68.1383				1256.32	3.12487			2393.94	3.59465				1256.32	3.38523			1214.72	4.31929			1214.72	3.8193
		1256.88	68.1383				1257.38	3.12482			2395.96	3.59469				1257.38	3.3853			1215.75	4.31919			1215.75	3.81919
		1257.94	68.138				1258.48	3.12485			2397.98	3.59453				1258.48	3.38527			1216.78	4.31924			1216.78	3.81923
		1259	68.138				1259.54	3.1248			2400.01	3.59478				1259.54	3.38537			1217.8	4.31914			1217.8	3.81924
		1260.06	68.138				1260.6	3.12485			2402.03	3.59475				1260.6	3.38518			1218.83	4.31919			1218.83	3.81918
		1261.12	68.138				1261.67	3.12486			2404.05	3.5947				1261.67	3.38518			1219.85	4.31919			1219.85	3.81922
		1262.18	68.1379				1262.73	3.1248			2406.08	3.59473				1262.73	3.3853			1220.88	4.31909			1220.88	3.81913
		1263.28	68.1378				1263.79	3.1248			2408.1	3.59467				1263.79	3.3852			1221.91	4.31914			1221.91	3.81919
		1264.34	68.1376				1264.85	3.12483			2410.12	3.59473				1264.85	3.38525			1222.93	4.31909			1222.93	3.81916
		1265.4	68.1377				1265.91	3.12483			2412.14	3.59467				1265.91	3.3852			1223.96	4.31914			1223.96	3.81914
		1266.46	68.1376				1266.97	3.12484			2414.17	3.59475				1266.97	3.38522			1224.98	4.31904			1224.98	3.81916
		1267.52	68.1374				1268.03	3.1248			2416.19	3.59467				1268.03	3.3852			1226.01	4.31904			1226.01	3.81918
		1268.58	68.1376				1269.09	3.12474			2418.21	3.59468				1269.09	3.38513			1227.04	4.31899			1227.04	3.81915
		1269.64	68.1373				1270.16	3.1248			2420.23	3.59459				1270.16	3.38513			1228.06	4.31904			1228.06	3.81919
		1270.7	68.1373				1271.22	3.1248			2422.26	3.59458				1271.22	3.38523			1229.09	4.31909			1229.09	3.81919
		1271.76	68.1376				1272.28	3.12475			2424.28	3.5946				1272.28	3.38522			1230.11	4.31904			1230.11	3.81919
		1272.82	68.1371				1273.34	3.12479			2426.3	3.59447				1273.34	3.38501			1231.14	4.31899			1231.14	3.81917
		1273.88	68.1371				1274.4	3.1248			2428.33	3.59439				1274.4	3.38513			1232.17	4.31899			1232.17	3.81917
		1274.95	68.137				1275.46	3.12476			2430.35	3.59444				1275.46	3.3851			1233.19	4.31894			1233.19	3.81916
		1276	68.1373				1276.52	3.12474			2432.37	3.5944				1276.52	3.38506			1234.22	4.31899			1234.22	3.8192
		1277.07	68.1371				1277.59	3.12481			2434.39	3.59437				1277.59	3.3851			1235.24	4.31894			1235.24	3.81914
		1278.13	68.137				1278.65	3.1248			2436.42	3.59443				1278.65	3.38515			1236.27	4.31889			1236.27	3.81909
		1279.19	68.1368				1279.71	3.12475			2438.44	3.59442				1279.71	3.38503			1237.3	4.31884			1237.3	3.81918
		1280.25	68.1369				1280.77	3.12476			2440.46	3.59438				1280.77	3.38506			1238.32	4.31894			1238.32	3.81922
		1281.31	68.1367				1281.83	3.12471			2442.49	3.59443				1281.83	3.38506			1239.35	4.31894			1239.35	3.81925
		1282.37	68.1367				1282.89	3.1248			2444.51	3.59427				1282.89	3.38501			1240.37	4.31884			1240.37	3.81918
		1283.43	68.1363				1283.95	3.12482			2446.53	3.5943				1283.95	3.38499			1241.4	4.31889			1241.4	3.81922
		1284.49	68.1365				1285.01	3.12484			2448.55	3.59432				1285.01	3.38508			1242.43	4.31889			1242.43	3.81914
		1285.55	68.1364				1286.07	3.12473			2450.58	3.59428				1286.07	3.38498			1243.45	4.31889			1243.45	3.81918
		1286.61	68.1367				1287.14	3.12482			2452.6	3.59429				1287.14	3.38505			1244.48	4.31889			1244.48	3.81918
		1287.67	68.1364				1288.2	3.12471			2454.62	3.59435				1288.2	3.38498			1245.5	4.31889			1245.5	3.81918
		1288.73	68.1362				1289.26	3.12474			2456.64	3.59436				1289.26	3.38496			1246.53	4.31879			1246.53	3.8192
		1289.79	68.1362				1290.32	3.12478			2458.67	3.59422				1290.32	3.3851			1247.56	4.31879			1247.56	3.81916
		1290.85	68.1363				1291.38	3.12484			2460.69	3.5942				1291.38	3.38494			1248.58	4.31874			1248.58	3.8192
		1291.91	68.1362				1292.44	3.1248			2462.71	3.59413				1292.44	3.38494			1249.61	4.31879			1249.61	3.81918
		1292.97	68.1361				1293.5	3.12476			2464.74	3.59418				1293.5	3.38494			1250.63	4.31879			1250.63	3.81913
		1294.03	68.1359				1294.56	3.12474			2466.76	3.59415				1294.56	3.38498			1251.66	4.31874			1251.66	3.81913
		1295.09	68.1359				1295.62	3.12471			2468.78	3.59399				1295.62	3.38498			1252.69	4.31874			1252.69	3.81914
		1296.16	68.1356				1296.68	3.12474			2470.8	3.59404				1296.68	3.38494			1253.71	4.31874			1253.71	3.81911
		1297.22	68.1357				1297.75	3.12473			2472.83	3.59402				1297.75	3.38489			1254.74	4.31879			1254.74	3.81915
		1298.28	68.1357				1298.81	3.12476			2474.85	3.59396				1298.81	3.38492			1255.76	4.31869			1255.76	3.81912
		1299.34	68.1356				1299.87	3.1247			2476.87	3.59399				1299.87	3.38489			1256.79	4.31869			1256.79	3.81901
		1300.4	68.1355				1300.93	3.12476			2478.9	3.59397				1300.93	3.38487			1257.82	4.31864			1257.82	3.81917
		1301.46	68.1356				1301.99	3.12476			2480.92	3.59395				1301.99	3.38496			1258.84	4.31864			1258.84	3.81915
		1302.52	68.1354				1303.05	3.12474			2482.94	3.59394				1303.05	3.38489			1259.87	4.31859			1259.87	3.8191
		1303.58	68.1354				1304.11	3.12469			2484.96	3.5939				1304.11	3.38494			1260.89	4.31859			1260.89	3.81911
		1304.64	68.1352				1305.17	3.12475			2486.99	3.59389				1305.17	3.38487			1261.92	4.31854			1261.92	3.81909
		1305.75	68.1352				1306.24	3.12468			2489.01	3.59383				1306.24	3.38489			1262.95	4.31854			1262.95	3.81916
		1306.81	68.1352				1307.34	3.12466			2491.03	3.59382				1307.34	3.38475			1263.97	4.31854			1263.97	3.81914
		1307.87	68.1351				1308.4	3.12469			2493.05	3.59381				1308.4	3.38472			1265	4.31849			1265	3.81913
		1308.93	68.1351				1309.46	3.12468			2495.08	3.59376				1309.46	3.38472			1266.02	4.31854			1266.02	3.81919
		1309.99	68.135				1310.52	3.1247			2497.1	3.5937				1310.52	3.38479			1267.05	4.31854			1267.05	3.81917
		1311.05	68.135				1311.58	3.12471			2499.12	3.59369				1311.58	3.38481			1268.08	4.31844			1268.08	3.81916
		1312.11	68.1348				1312.64	3.12468			2501.15	3.59371				1312.64	3.38482			1269.1	4.31849			1269.1	3.81918
		1313.17	68.1348				1313.7	3.12468			2503.17	3.5938				1313.7	3.38489			1270.13	4.31849			1270.13	3.81919
		1314.23	68.1346				1314.76	3.1247			2505.19	3.59378				1314.76	3.38472			1271.15	4.31844			1271.15	3.81923
		1315.29	68.1346				1315.82	3.12465			2507.21	3.59371				1315.82	3.38489			1272.18	4.31844			1272.18	3.81918
		1316.35	68.1347				1316.89	3.12468			2509.24	3.5937				1316.89	3.38472			1273.2	4.31839			1273.2	3.81918
		1317.41	68.1346				1317.95	3.1247			2511.26	3.59365				1317.95	3.38465			1274.23	4.31844			1274.23	3.81914
		1318.47	68.1346				1319.01	3.12468			2513.28	3.59365				1319.01	3.3847			1275.26	4.31849			1275.26	3.8191
		1319.53	68.1344				1320.07	3.12466			2515.31	3.59366				1320.07	3.38472			1276.28	4.31849			1276.28	3.81912
		1320.59	68.1343				1321.13	3.1247			2517.33	3.59368				1321.13	3.38465			1277.31	4.31849			1277.31	3.81911
		1321.66	68.1342				1322.19	3.12462			2519.35	3.59372				1322.19	3.38475			1278.33	4.31849			1278.33	3.8191
		1322.72	68.1344				1323.25	3.12465			2521.37	3.59363				1323.25	3.3847			1279.36	4.31844			1279.36	3.81906
		1323.78	68.1341				1324.31	3.12469			2523.4	3.59359				1324.31	3.38472			1280.39	4.31849			1280.39	3.81905
		1324.84	68.1341				1325.37	3.12471			2525.42	3.59358				1325.37	3.38477			1281.41	4.31854			1281.41	3.81909
		1325.9	68.1341				1326.43	3.12465			2527.44	3.59361				1326.43	3.38458			1282.44	4.31839			1282.44	3.81904
		1326.96	68.1338				1327.49	3.12468			2529.46	3.59364				1327.49	3.38463			1283.46	4.31844			1283.46	3.8191
		1328.02	68.134				1328.56	3.1247			2531.49	3.59363				1328.56	3.3846			1284.49	4.31839			1284.49	3.81917
		1329.08	68.1338				1329.62	3.1247			2533.51	3.59364				1329.62	3.38465			1285.52	4.31834			1285.52	3.81913
		1330.14	68.1336				1330.68	3.12465			2535.53	3.59368				1330.68	3.38463			1286.54	4.31839			1286.54	3.81912
		1331.2	68.1337				1331.8	3.12468			2537.56	3.5937				1331.8	3.38465			1287.57	4.31839			1287.57	3.81917
		1332.26	68.1337				1332.86	3.12467			2539.58	3.59358				1332.86	3.38465			1288.59	4.31839			1288.59	3.81911
		1333.32	68.1336				1333.92	3.1247			2541.6	3.59366				1333.92	3.3847			1289.62	4.31824			1289.62	3.81905
		1334.4	68.1335				1334.98	3.12468			2543.62	3.59362				1334.98	3.38467			1290.65	4.31824			1290.65	3.81906
		1335.46	68.1334				1336.04	3.12463			2545.65	3.5936				1336.04	3.3847			1291.67	4.31824			1291.67	3.81906
		1336.53	68.1333				1337.1	3.12468			2547.67	3.59366				1337.1	3.38453			1292.7	4.31829			1292.7	3.81907
		1337.59	68.1332				1338.16	3.12463			2549.69	3.59361				1338.16	3.38463			1293.72	4.31824			1293.72	3.81904
		1338.65	68.1331				1339.22	3.12463			2551.72	3.5937				1339.22	3.3846			1294.75	4.31819			1294.75	3.81905
		1339.71	68.1329				1340.29	3.12467			2553.74	3.59362				1340.29	3.38458			1295.78	4.31829			1295.78	3.81902
		1340.77	68.133				1341.35	3.12464			2555.76	3.59366				1341.35	3.38463			1296.8	4.31824			1296.8	3.81899
		1341.83	68.1329				1342.41	3.12468			2557.78	3.59366				1342.41	3.38463			1297.83	4.31829			1297.83	3.81898
		1342.89	68.1329				1343.47	3.12468			2559.81	3.59368				1343.47	3.38441			1298.85	4.31824			1298.85	3.819
		1343.95	68.133				1344.53	3.12468			2561.83	3.59362				1344.53	3.38449			1299.88	4.31829			1299.88	3.81903
		1345.01	68.1327				1345.59	3.12465			2563.85	3.59364				1345.59	3.38458			1300.91	4.31819			1300.91	3.81901
		1346.07	68.1326				1346.65	3.12466			2565.87	3.59373				1346.65	3.3846			1301.93	4.31824			1301.93	3.81901
		1347.13	68.1326				1347.71	3.12459			2567.9	3.59371				1347.71	3.38446			1302.96	4.31819			1302.96	3.819
		1348.19	68.1326				1348.77	3.12465			2569.92	3.59377				1348.77	3.38446			1303.98	4.31819			1303.98	3.81906
		1349.25	68.1325				1349.89	3.12463			2571.94	3.59364				1349.89	3.38448			1305.01	4.31809			1305.01	3.81904
		1350.31	68.1326				1350.95	3.12468			2573.97	3.59372				1350.95	3.38446			1306.04	4.31819			1306.04	3.819
		1351.37	68.1326				1352.01	3.12462			2575.99	3.59376				1352.01	3.38439			1307.06	4.31819			1307.06	3.81901
		1352.46	68.1323				1353.07	3.12466			2578.01	3.59368				1353.07	3.38453			1308.09	4.31819			1308.09	3.81899
		1353.52	68.1322				1354.13	3.12463			2580.03	3.59364				1354.13	3.38453			1309.11	4.31819			1309.11	3.81898
		1354.59	68.1322				1355.19	3.12467			2582.06	3.59359				1355.19	3.38439			1310.14	4.31819			1310.14	3.81896
		1355.65	68.1321				1356.25	3.12468			2584.08	3.5936				1356.25	3.38439			1311.17	4.31809			1311.17	3.8189
		1356.71	68.1321				1357.31	3.12465			2586.1	3.59354				1357.31	3.38439			1312.19	4.31814			1312.19	3.81894
		1357.77	68.132				1358.38	3.12458			2588.13	3.59353				1358.38	3.38446			1313.22	4.31809			1313.22	3.81895
		1358.83	68.132				1359.44	3.12463			2590.15	3.5935				1359.44	3.38436			1314.24	4.31804			1314.24	3.8189
		1359.89	68.1317				1360.5	3.12466			2592.17	3.59356				1360.5	3.38453			1315.27	4.31809			1315.27	3.81895
		1360.95	68.1316				1361.56	3.12465			2594.19	3.59345				1361.56	3.38446			1316.3	4.31804			1316.3	3.81893
		1362.01	68.1317				1362.62	3.12462			2596.22	3.59352				1362.62	3.38445			1317.32	4.31809			1317.32	3.81897
		1363.07	68.1316				1363.68	3.12462			2598.24	3.59352				1363.68	3.38448			1318.35	4.31804			1318.35	3.81902
		1364.13	68.1316				1364.74	3.12474			2600.26	3.59359				1364.74	3.38453			1319.37	4.31804			1319.37	3.81898
		1365.19	68.1314				1365.8	3.12465			2602.28	3.59351				1365.8	3.38441			1320.4	4.31804			1320.4	3.81896
		1366.25	68.1313				1366.86	3.12465			2604.31	3.59361				1366.86	3.38448			1321.43	4.31809			1321.43	3.81894
		1367.31	68.1312				1367.93	3.12465			2606.33	3.59358				1367.93	3.38448			1322.45	4.31804			1322.45	3.81893
		1368.37	68.1313				1368.99	3.12459			2608.35	3.59355				1368.99	3.38446			1323.48	4.31799			1323.48	3.81895
		1369.43	68.1312				1370.05	3.12462			2610.38	3.5935				1370.05	3.38443			1324.5	4.31804			1324.5	3.81897
		1370.53	68.131				1371.11	3.12462			2612.4	3.59355				1371.11	3.38439			1325.53	4.31804			1325.53	3.81894
		1371.59	68.1309				1372.25	3.12462			2614.42	3.59356				1372.25	3.38439			1326.56	4.31799			1326.56	3.81897
		1372.65	68.1311				1373.31	3.12468			2616.44	3.59359				1373.31	3.3845			1327.58	4.31804			1327.58	3.81891
		1373.72	68.1309				1374.37	3.12463			2618.47	3.59361				1374.37	3.38453			1328.61	4.31799			1328.61	3.81888
		1374.78	68.1306				1375.43	3.12463			2620.49	3.59352				1375.43	3.38458			1329.63	4.31799			1329.63	3.81886
		1375.84	68.1308				1376.49	3.12466			2622.51	3.59349				1376.49	3.38462			1330.66	4.31799			1330.66	3.81885
		1376.9	68.1306				1377.55	3.12466			2624.54	3.59355				1377.55	3.38467			1331.69	4.31789			1331.69	3.81884
		1377.96	68.1305				1378.62	3.12463			2626.56	3.59345				1378.62	3.38467			1332.71	4.31799			1332.71	3.81889
		1379.02	68.1303				1379.68	3.12459			2628.58	3.59352				1379.68	3.38484			1333.74	4.31789			1333.74	3.81891
		1380.08	68.1308				1380.74	3.12461			2630.6	3.59345				1380.74	3.38493			1334.76	4.31789			1334.76	3.8189
		1381.14	68.1308				1381.8	3.12463			2632.63	3.59349				1381.8	3.385			1335.79	4.31794			1335.79	3.81889
		1382.2	68.1308				1382.86	3.12463			2634.65	3.59344				1382.86	3.38519			1336.82	4.31789			1336.82	3.8189
		1383.26	68.1307				1383.92	3.12462			2636.67	3.59354				1383.92	3.3852			1337.84	4.31784			1337.84	3.81895
		1384.32	68.1307				1384.98	3.12462			2638.69	3.59349				1384.98	3.38541			1338.87	4.31789			1338.87	3.81897
		1385.38	68.1305				1386.04	3.12459			2640.72	3.59353				1386.04	3.38548			1339.89	4.31789			1339.89	3.81893
		1386.44	68.1303				1387.11	3.12454			2642.74	3.59356				1387.11	3.38565			1340.92	4.31789			1340.92	3.81892
		1387.5	68.1301				1388.17	3.12462			2644.76	3.59355				1388.17	3.38577			1341.95	4.31784			1341.95	3.81895
		1388.56	68.1292				1389.23	3.12467			2646.79	3.59354				1389.23	3.38584			1342.97	4.31789			1342.97	3.81897
		1389.62	68.1286				1390.29	3.12462			2648.81	3.59355				1390.29	3.38601			1344	4.31784			1344	3.81892
		1390.77	68.1278				1391.35	3.12463			2650.83	3.59348				1391.35	3.3861			1345.02	4.31789			1345.02	3.81886
		1391.83	68.1273				1392.41	3.12468			2652.85	3.59356				1392.41	3.38634			1346.05	4.31784			1346.05	3.81889
		1392.89	68.1269				1393.48	3.12468			2654.88	3.59357				1393.48	3.38646			1347.08	4.31774			1347.08	3.81891
		1393.95	68.1266				1394.56	3.12465			2656.9	3.59363				1394.56	3.38653			1348.1	4.31779			1348.1	3.81892
		1395.01	68.1262				1395.62	3.12463			2658.92	3.59348				1395.62	3.38667			1349.13	4.31774			1349.13	3.81886
		1396.07	68.1259				1396.68	3.12465			2660.95	3.59352				1396.68	3.38681			1350.15	4.31779			1350.15	3.81892
		1397.13	68.1258				1397.74	3.12463			2662.97	3.59351				1397.74	3.38693			1351.18	4.31774			1351.18	3.81886
		1398.19	68.1255				1398.8	3.12468			2664.99	3.59351				1398.8	3.38705			1352.21	4.31774			1352.21	3.81896
		1399.25	68.1253				1399.86	3.12468			2667.01	3.59352				1399.86	3.38724			1353.23	4.31779			1353.23	3.81885
		1400.31	68.1252				1400.93	3.12473			2669.04	3.59353				1400.93	3.38741			1354.26	4.31774			1354.26	3.81885
		1401.37	68.1249				1401.99	3.12463			2671.06	3.59344				1401.99	3.38751			1355.28	4.31774			1355.28	3.81884
		1402.43	68.1248				1403.05	3.12467			2673.08	3.59359				1403.05	3.3876			1356.31	4.31774			1356.31	3.81881
		1403.49	68.1246				1404.11	3.12477			2675.1	3.59357				1404.11	3.38767			1357.34	4.31774			1357.34	3.81889
		1404.56	68.1245				1405.17	3.12469			2677.13	3.59362				1405.17	3.38789			1358.36	4.31774			1358.36	3.81887
		1405.62	68.1245				1406.23	3.12473			2679.15	3.5936				1406.23	3.38806			1359.39	4.31769			1359.39	3.81888
		1406.68	68.1243				1407.29	3.12469			2681.17	3.5937				1407.29	3.38827			1360.41	4.31774			1360.41	3.81889
		1407.74	68.1243				1408.35	3.12475			2683.2	3.59368				1408.35	3.38851			1361.44	4.31774			1361.44	3.81893
		1408.8	68.1241				1409.41	3.12475			2685.22	3.59368				1409.41	3.38872			1362.46	4.31769			1362.46	3.8188
		1409.86	68.124				1410.47	3.12478			2687.24	3.59364				1410.47	3.38877			1363.49	4.31769			1363.49	3.81881
		1411	68.1239				1411.53	3.12477			2689.26	3.59365				1411.53	3.38898			1364.52	4.31769			1364.52	3.81883
		1412.06	68.1238				1412.59	3.12484			2691.29	3.59362				1412.59	3.38906			1365.54	4.31774			1365.54	3.81884
		1413.12	68.1237				1413.65	3.12479			2693.31	3.59364				1413.65	3.38924			1366.57	4.31769			1366.57	3.81888
		1414.18	68.1237				1414.72	3.12482			2695.33	3.59365				1414.72	3.38941			1367.59	4.31769			1367.59	3.81891
		1415.24	68.1236				1415.78	3.1248			2697.36	3.59362				1415.78	3.3897			1368.62	4.31774			1368.62	3.81888
		1416.3	68.1235				1416.84	3.12482			2699.38	3.59356				1416.84	3.38972			1369.65	4.31774			1369.65	3.81883
		1417.36	68.1234				1417.9	3.12484			2701.4	3.59355				1417.9	3.38986			1370.67	4.31769			1370.67	3.81876
		1418.43	68.1233				1418.96	3.1248			2703.42	3.59357				1418.96	3.39017			1371.7	4.31769			1371.7	3.8188
		1419.49	68.1232				1420.02	3.12484			2705.45	3.59352				1420.02	3.39034			1372.72	4.31769			1372.72	3.81877
		1420.55	68.1233				1421.08	3.12484			2707.47	3.59351				1421.08	3.39032			1373.75	4.31769			1373.75	3.81881
		1421.61	68.1232				1422.14	3.12483			2709.49	3.59359				1422.14	3.39044			1374.78	4.31769			1374.78	3.81882
		1422.67	68.123				1423.28	3.12489			2711.51	3.59356				1423.28	3.39065			1375.8	4.31764			1375.8	3.81881
		1423.73	68.1231				1424.34	3.12487			2713.54	3.59354				1424.34	3.39089			1376.83	4.31769			1376.83	3.81876
		1424.79	68.1229				1425.41	3.12482			2715.56	3.5935				1425.41	3.39101			1377.85	4.31764			1377.85	3.81884
		1425.85	68.1231				1426.47	3.12487			2717.58	3.5936				1426.47	3.3912			1378.88	4.31769			1378.88	3.81887
		1426.91	68.123				1427.53	3.12488			2719.61	3.59353				1427.53	3.39132			1379.91	4.31764			1379.91	3.81882
		1427.97	68.1229				1428.59	3.12482			2721.63	3.59347				1428.59	3.39142			1380.93	4.31759			1380.93	3.81878
		1429.03	68.1227				1429.65	3.1249			2723.65	3.59347				1429.65	3.39151			1381.96	4.31759			1381.96	3.81872
		1430.09	68.1227				1430.71	3.12484			2725.67	3.59346				1430.71	3.39182			1382.98	4.31759			1382.98	3.81878
		1431.23	68.1227				1431.77	3.1249			2727.7	3.5935				1431.77	3.39187			1384.01	4.31754			1384.01	3.81876
		1432.29	68.1225				1432.84	3.12489			2729.72	3.59362				1432.84	3.39208			1385.04	4.31749			1385.04	3.81873
		1433.35	68.1226				1433.9	3.12487			2731.74	3.59358				1433.9	3.3922			1386.06	4.31749			1386.06	3.81876
		1434.41	68.1225				1434.96	3.12485			2733.77	3.59353				1434.96	3.3923			1387.09	4.31749			1387.09	3.81875
		1435.48	68.1223				1436.02	3.12487			2735.79	3.59361				1436.02	3.39242			1388.11	4.31744			1388.11	3.81871
		1436.54	68.1222				1437.08	3.1249			2737.81	3.59359				1437.08	3.3927			1389.14	4.31754			1389.14	3.81874
		1437.6	68.1223				1438.14	3.12487			2739.83	3.5935				1438.14	3.3928			1390.17	4.31749			1390.17	3.81875
		1438.66	68.1223				1439.2	3.12489			2741.86	3.59343				1439.2	3.39301			1391.19	4.31749			1391.19	3.81876
		1439.72	68.122				1440.26	3.12494			2743.88	3.59347				1440.26	3.39318			1392.22	4.31744			1392.22	3.81871
		1440.78	68.1221				1441.32	3.12495			2745.9	3.59347				1441.32	3.3933			1393.24	4.31749			1393.24	3.81878
		1441.84	68.1222				1442.39	3.12495			2747.92	3.59348				1442.39	3.39353			1394.27	4.31749			1394.27	3.81869
		1442.9	68.122				1443.45	3.12494			2749.95	3.59346				1443.45	3.39361			1395.3	4.31749			1395.3	3.81872
		1443.96	68.1221				1444.51	3.12495			2751.97	3.59347				1444.51	3.39365			1396.32	4.31744			1396.32	3.81868
		1445.02	68.1218				1445.57	3.12501			2753.99	3.59353				1445.57	3.39404			1397.35	4.31744			1397.35	3.8187
		1446.08	68.1219				1446.63	3.12499			2756.02	3.59348				1446.63	3.39413			1398.37	4.31749			1398.37	3.81866
		1447.14	68.122				1447.69	3.12501			2758.04	3.5935				1447.69	3.3942			1399.4	4.31749			1399.4	3.81871
		1448.2	68.122				1448.75	3.12498			2760.06	3.5936				1448.75	3.39435			1400.43	4.31739			1400.43	3.8187
		1449.3	68.1219				1449.82	3.12501			2762.08	3.59355				1449.82	3.39461			1401.45	4.31744			1401.45	3.81866
		1450.36	68.1217				1450.88	3.12502			2764.11	3.5935				1450.88	3.39471			1402.48	4.31739			1402.48	3.81874
		1451.42	68.1218				1451.94	3.12499			2766.13	3.59342				1451.94	3.39485			1403.5	4.31744			1403.5	3.81876
		1452.49	68.1218				1453	3.12498			2768.15	3.59347				1453	3.39497			1404.53	4.31744			1404.53	3.81871
		1453.55	68.1216				1454.06	3.12507			2770.18	3.5934				1454.06	3.39513			1405.56	4.31739			1405.56	3.81868
		1454.61	68.1217				1455.12	3.12505			2772.2	3.59351				1455.12	3.39542			1406.58	4.31744			1406.58	3.81871
		1455.67	68.1217				1456.18	3.12512			2774.22	3.59348				1456.18	3.39542			1407.61	4.31739			1407.61	3.81869
		1456.73	68.1216				1457.24	3.12507			2776.24	3.59349				1457.24	3.39566			1408.63	4.31744			1408.63	3.81868
		1457.79	68.1216				1458.31	3.12507			2778.27	3.59348				1458.31	3.39571			1409.66	4.31734			1409.66	3.81872
		1458.85	68.1215				1459.37	3.1251			2780.29	3.5935				1459.37	3.39592			1410.69	4.31734			1410.69	3.81862
		1459.91	68.1215				1460.43	3.1251			2782.31	3.59351				1460.43	3.39609			1411.71	4.31734			1411.71	3.81865
		1460.97	68.1215				1461.49	3.12514			2784.34	3.59356				1461.49	3.39618			1412.74	4.31734			1412.74	3.81861
		1462.03	68.1215				1462.55	3.12515			2786.36	3.59358				1462.55	3.3963			1413.76	4.31734			1413.76	3.81863
		1463.09	68.1212				1463.61	3.12514			2788.38	3.59349				1463.61	3.3964			1414.79	4.31734			1414.79	3.81856
		1464.15	68.1212				1464.67	3.12519			2790.4	3.59347				1464.67	3.39659			1415.82	4.31734			1415.82	3.81856
		1465.21	68.1211				1465.74	3.12514			2792.43	3.5935				1465.74	3.39671			1416.84	4.31739			1416.84	3.81852
		1466.27	68.1212				1466.8	3.12515			2794.45	3.59355				1466.8	3.39683			1417.87	4.31739			1417.87	3.81859
		1467.34	68.1212				1467.86	3.1252			2796.47	3.59357				1467.86	3.39697			1418.89	4.31739			1418.89	3.81854
		1468.4	68.121				1468.92	3.1252			2798.49	3.59352				1468.92	3.39709			1419.92	4.31734			1419.92	3.8185
		1469.46	68.1211				1469.98	3.12522			2800.52	3.59349				1469.98	3.39733			1420.95	4.31729			1420.95	3.81851
		1470.52	68.1211				1471.04	3.1252			2802.54	3.5935				1471.04	3.39742			1421.97	4.31729			1421.97	3.81858
		1471.58	68.121				1472.1	3.12519			2804.56	3.59354				1472.1	3.39747			1423	4.31734			1423	3.81857
		1472.64	68.121				1473.17	3.12522			2806.59	3.59359				1473.17	3.39776			1424.02	4.31734			1424.02	3.81857
		1473.7	68.1209				1474.23	3.12526			2808.61	3.59362				1474.23	3.39792			1425.05	4.31734			1425.05	3.81855
		1474.76	68.1209				1475.29	3.12524			2810.63	3.59356				1475.29	3.39802			1426.08	4.31734			1426.08	3.81862
		1475.82	68.1208				1476.35	3.12521			2812.65	3.59363				1476.35	3.39826			1427.1	4.31729			1427.1	3.81855
		1476.88	68.1209				1477.41	3.12525			2814.68	3.59351				1477.41	3.39821			1428.13	4.31729			1428.13	3.81853
		1477.94	68.1208				1478.47	3.12519			2816.7	3.59355				1478.47	3.39833			1429.15	4.31734			1429.15	3.81857
		1479	68.1209				1479.53	3.12524			2818.72	3.59356				1479.53	3.3985			1430.18	4.31734			1430.18	3.81858
		1480.06	68.1209				1480.59	3.12525			2820.75	3.59362				1480.59	3.39864			1431.21	4.31724			1431.21	3.81853
		1481.12	68.1207				1481.66	3.12524			2822.77	3.59361				1481.66	3.39878			1432.23	4.31734			1432.23	3.8185
		1482.18	68.1205				1482.72	3.12522			2824.79	3.59354				1482.72	3.3989			1433.26	4.31729			1433.26	3.81853
		1483.24	68.1207				1483.78	3.12529			2826.81	3.59357				1483.78	3.39904			1434.28	4.31729			1434.28	3.81857
		1484.3	68.1207				1484.84	3.12526			2828.84	3.59348				1484.84	3.39919			1435.31	4.31724			1435.31	3.8186
		1485.37	68.1207				1485.9	3.12531			2830.86	3.59354				1485.9	3.39935			1436.34	4.31729			1436.34	3.81859
		1486.43	68.1206				1486.96	3.12529			2832.88	3.59352				1486.96	3.39945			1437.36	4.31724			1437.36	3.81859
		1487.49	68.1207				1488.02	3.12527			2834.9	3.59348				1488.02	3.39957			1438.39	4.31724			1438.39	3.81855
		1488.55	68.1207				1489.08	3.12529			2836.93	3.59351				1489.08	3.39959			1439.41	4.31724			1439.41	3.81866
		1489.61	68.1205				1490.14	3.12531			2838.95	3.59353				1490.14	3.39983			1440.44	4.31729			1440.44	3.81857
		1490.67	68.1205				1491.21	3.12527			2840.97	3.59345				1491.21	3.39995			1441.46	4.31729			1441.46	3.81856
		1491.79	68.1205				1492.27	3.12525			2843	3.59345				1492.27	3.40002			1442.49	4.31724			1442.49	3.81853
		1492.85	68.1204				1493.33	3.12527			2845.02	3.59349				1493.33	3.40019			1443.52	4.31729			1443.52	3.81856
		1493.91	68.1205				1494.39	3.12534			2847.04	3.59355				1494.39	3.40021			1444.54	4.31729			1444.54	3.8186
		1494.97	68.1205				1495.45	3.12531			2849.06	3.59348				1495.45	3.4005			1445.57	4.31729			1445.57	3.81853
		1496.03	68.1206				1496.51	3.12536			2851.09	3.59349				1496.51	3.40052			1446.59	4.31734			1446.59	3.81852
		1497.09	68.1205				1497.58	3.12535			2853.11	3.5935				1497.58	3.4005			1447.62	4.31729			1447.62	3.81852
		1498.15	68.1203				1498.64	3.12537			2855.13	3.5935				1498.64	3.40067			1448.65	4.31724			1448.65	3.81852
		1499.21	68.1205				1499.7	3.12532			2857.16	3.59344				1499.7	3.40085			1449.67	4.31729			1449.67	3.81845
		1500.27	68.1203				1500.76	3.12536			2859.18	3.59349				1500.76	3.40085			1450.7	4.31729			1450.7	3.81847
		1501.33	68.1204				1501.82	3.12546			2861.2	3.59346				1501.82	3.40107			1451.72	4.31724			1451.72	3.81847
		1502.39	68.1204				1502.88	3.12538			2863.22	3.59351				1502.88	3.40112			1452.75	4.31719			1452.75	3.81841
		1503.45	68.1202				1503.94	3.12536			2865.25	3.59344				1503.94	3.40136			1453.78	4.31724			1453.78	3.81849
		1504.52	68.1203				1505.01	3.12543			2867.27	3.59355				1505.01	3.40145			1454.8	4.31724			1454.8	3.81849
		1505.58	68.1201				1506.07	3.12541			2869.29	3.5935				1506.07	3.40145			1455.83	4.31724			1455.83	3.81843
		1506.64	68.1203				1507.13	3.12537			2871.31	3.59362				1507.13	3.40159			1456.85	4.31729			1456.85	3.81847
		1507.7	68.1203				1508.19	3.12536			2873.34	3.59351				1508.19	3.40164			1457.88	4.31724			1457.88	3.81848
		1508.76	68.1202				1509.25	3.12546			2875.36	3.59362				1509.25	3.40174			1458.91	4.31724			1458.91	3.81841
		1509.82	68.1202				1510.32	3.12548			2877.38	3.59357				1510.32	3.4019			1459.93	4.31729			1459.93	3.81846
		1510.88	68.12				1511.39	3.12541			2879.41	3.59352				1511.39	3.40197			1460.96	4.31729			1460.96	3.81842
		1511.99	68.1202				1512.45	3.12543			2881.43	3.59353				1512.45	3.40202			1461.98	4.31729			1461.98	3.81844
		1513.05	68.1202				1513.51	3.12548			2883.45	3.59345				1513.51	3.40214			1463.01	4.31734			1463.01	3.81843
		1514.11	68.1201				1514.57	3.12547			2885.47	3.59349				1514.57	3.40216			1464.04	4.31724			1464.04	3.8184
		1515.17	68.12				1515.63	3.12546			2887.5	3.5935				1515.63	3.40233			1465.06	4.31724			1465.06	3.8184
		1516.23	68.1202				1516.69	3.12548			2889.52	3.59368				1516.69	3.40247			1466.09	4.31724			1466.09	3.81836
		1517.3	68.1201				1517.75	3.12548			2891.54	3.59383				1517.75	3.40243			1467.11	4.31724			1467.11	3.81842
		1518.36	68.12				1518.82	3.12548			2893.57	3.59386				1518.82	3.40257			1468.14	4.31729			1468.14	3.81845
		1519.42	68.12				1519.88	3.12548			2895.59	3.59376				1519.88	3.40269			1469.17	4.31729			1469.17	3.8184
		1520.48	68.1199				1520.94	3.12552			2897.61	3.59384				1520.94	3.40276			1470.19	4.31724			1470.19	3.8184
		1521.54	68.12				1522	3.12552			2899.63	3.59376				1522	3.40283			1471.22	4.31729			1471.22	3.81844
		1522.6	68.1201				1523.06	3.12554			2901.66	3.59375				1523.06	3.40293			1472.24	4.31724			1472.24	3.81845
		1523.66	68.1199				1524.12	3.12552			2903.68	3.59371				1524.12	3.40305			1473.27	4.31719			1473.27	3.81849
		1524.72	68.12				1525.18	3.12553			2905.7	3.59371				1525.18	3.40305			1474.3	4.31719			1474.3	3.81843
		1525.78	68.1199				1526.24	3.12555			2907.72	3.59354				1526.24	3.40321			1475.32	4.31719			1475.32	3.81843
		1526.84	68.12				1527.3	3.12554			2909.75	3.59354				1527.3	3.40328			1476.35	4.31724			1476.35	3.81836
		1527.9	68.12				1528.36	3.12557			2911.77	3.59359				1528.36	3.40352			1477.37	4.31724			1477.37	3.81847
		1528.96	68.1199				1529.43	3.12558			2913.79	3.59367				1529.43	3.4035			1478.4	4.31719			1478.4	3.81847
		1530.02	68.1199				1530.49	3.12558			2915.82	3.59354				1530.49	3.40364			1479.43	4.31729			1479.43	3.81848
		1531.08	68.12				1531.55	3.12557			2917.84	3.59359				1531.55	3.40364			1480.45	4.31724			1480.45	3.81842
		1532.15	68.1198				1532.61	3.12553			2919.86	3.59363				1532.61	3.40364			1481.48	4.31724			1481.48	3.81834
		1533.21	68.1199				1533.67	3.12555			2921.88	3.59366				1533.67	3.40374			1482.5	4.31724			1482.5	3.8184
		1534.27	68.1196				1534.73	3.12552			2923.91	3.59368				1534.73	3.40388			1483.53	4.31724			1483.53	3.81839
		1535.33	68.1199				1535.79	3.12557			2925.93	3.59372				1535.79	3.40393			1484.56	4.31724			1484.56	3.81837
		1536.39	68.1198				1536.85	3.12557			2927.95	3.59396				1536.85	3.40402			1485.58	4.31719			1485.58	3.81844
		1537.45	68.1199				1537.92	3.12562			2929.98	3.59389				1537.92	3.40407			1486.61	4.31724			1486.61	3.81841
		1538.51	68.1198				1539.01	3.12563			2932	3.59387				1539.01	3.40421			1487.63	4.31719			1487.63	3.81843
		1539.57	68.1197				1540.07	3.12561			2934.02	3.59387				1540.07	3.40429			1488.66	4.31714			1488.66	3.81842
		1540.63	68.1199				1541.13	3.12566			2936.04	3.59406				1541.13	3.40436			1489.69	4.31719			1489.69	3.81841
		1541.69	68.1198				1542.19	3.12563			2938.07	3.59418				1542.19	3.40448			1490.71	4.31719			1490.71	3.8184
		1542.75	68.1197				1543.25	3.12563			2940.09	3.59429				1543.25	3.40448			1491.74	4.31719			1491.74	3.81835
		1543.81	68.1197				1544.31	3.12567			2942.11	3.59432				1544.31	3.40445			1492.76	4.31724			1492.76	3.81841
		1544.88	68.1195				1545.37	3.12563			2944.13	3.59427				1545.37	3.40452			1493.79	4.31714			1493.79	3.81839
		1545.94	68.1194				1546.44	3.12567			2946.16	3.59431				1546.44	3.4046			1494.82	4.31719			1494.82	3.81829
		1547	68.1197				1547.5	3.12566			2948.18	3.59439				1547.5	3.40479			1495.84	4.31719			1495.84	3.81837
		1548.06	68.1195				1548.56	3.12569			2950.2	3.59434				1548.56	3.40469			1496.87	4.31719			1496.87	3.81828
		1549.12	68.1195				1549.62	3.12567			2952.23	3.59442				1549.62	3.40476			1497.89	4.31714			1497.89	3.81828
		1550.18	68.1194				1550.68	3.12575			2954.25	3.59455				1550.68	3.40493			1498.92	4.31714			1498.92	3.81836
		1551.24	68.1197				1551.74	3.12567			2956.27	3.59445				1551.74	3.40495			1499.95	4.31719			1499.95	3.81836
		1552.3	68.1196				1552.8	3.12572			2958.29	3.59452				1552.8	3.40498			1500.97	4.31719			1500.97	3.81827
		1553.36	68.1194				1553.87	3.12566			2960.32	3.59448				1553.87	3.40515			1502	4.31719			1502	3.81823
		1554.48	68.1195				1554.93	3.12567			2962.34	3.59453				1554.93	3.40519			1503.02	4.31719			1503.02	3.81835
		1555.54	68.1194				1555.99	3.12569			2964.36	3.59451				1555.99	3.40522			1504.05	4.31719			1504.05	3.81831
		1556.6	68.1194				1557.05	3.12569			2966.39	3.59453				1557.05	3.40538			1505.08	4.31719			1505.08	3.8183
		1557.66	68.1195				1558.11	3.12574			2968.41	3.59463				1558.11	3.40553			1506.1	4.31724			1506.1	3.81835
		1558.72	68.1194				1559.24	3.12574			2970.43	3.59477				1559.24	3.40553			1507.13	4.31719			1507.13	3.81833
		1559.78	68.1195				1560.3	3.12573			2972.45	3.59474				1560.3	3.40567			1508.15	4.31714			1508.15	3.8183
		1560.84	68.1194				1561.36	3.12578			2974.48	3.59489				1561.36	3.40567			1509.18	4.31719			1509.18	3.81836
		1561.9	68.1194				1562.42	3.12574			2976.5	3.59476				1562.42	3.40567			1510.21	4.31709			1510.21	3.81838
		1562.96	68.1194				1563.48	3.12582			2978.52	3.59482				1563.48	3.40579			1511.23	4.31719			1511.23	3.81828
		1564.02	68.1193				1564.54	3.12578			2980.55	3.59473				1564.54	3.40588			1512.26	4.31714			1512.26	3.81832
		1565.08	68.1193				1565.61	3.12578			2982.57	3.59455				1565.61	3.40595			1513.28	4.31719			1513.28	3.81833
		1566.14	68.1192				1566.67	3.12578			2984.59	3.59467				1566.67	3.40598			1514.31	4.31709			1514.31	3.81835
		1567.2	68.1193				1567.73	3.12582			2986.61	3.59463				1567.73	3.406			1515.34	4.31709			1515.34	3.81836
		1568.26	68.1192				1568.79	3.12584			2988.64	3.59464				1568.79	3.40612			1516.36	4.31714			1516.36	3.81832
		1569.33	68.1192				1569.85	3.12585			2990.66	3.59475				1569.85	3.40617			1517.39	4.31719			1517.39	3.81821
		1570.39	68.1192				1570.91	3.12587			2992.68	3.5947				1570.91	3.4061			1518.41	4.31714			1518.41	3.81825
		1571.45	68.1189				1571.97	3.1259			2994.7	3.5947				1571.97	3.40624			1519.44	4.31714			1519.44	3.81818
		1572.51	68.119				1573.04	3.12584			2996.73	3.59471				1573.04	3.40624			1520.46	4.31719			1520.46	3.81821
		1573.57	68.119				1574.1	3.12589			2998.75	3.59479				1574.1	3.40627			1521.49	4.31719			1521.49	3.81822
		1574.63	68.119				1575.16	3.1259			3000.77	3.59486				1575.16	3.40646			1522.52	4.31724			1522.52	3.81823
		1575.69	68.119				1576.22	3.1259			3002.8	3.59484				1576.22	3.40653			1523.54	4.31719			1523.54	3.81822
		1576.78	68.1192				1577.28	3.12593			3004.82	3.59485				1577.28	3.40643			1524.57	4.31719			1524.57	3.81819
		1577.85	68.119				1578.34	3.12593			3006.84	3.59481				1578.34	3.40657			1525.59	4.31719			1525.59	3.81818
		1578.9	68.1188				1579.4	3.12591			3008.86	3.59488				1579.4	3.40662			1526.62	4.31724			1526.62	3.81824
		1579.97	68.1189				1580.46	3.1259			3010.89	3.59475				1580.46	3.40662			1527.65	4.31719			1527.65	3.81818
		1581.03	68.119				1581.53	3.12594			3012.91	3.59465				1581.53	3.40669			1528.67	4.31714			1528.67	3.81824
		1582.09	68.1189				1582.59	3.1259			3014.93	3.5948				1582.59	3.40674			1529.7	4.31719			1529.7	3.81829
		1583.15	68.119				1583.65	3.12596			3016.96	3.59482				1583.65	3.40681			1530.72	4.31709			1530.72	3.8183
		1584.21	68.1189				1584.71	3.12598			3018.98	3.59488				1584.71	3.40674			1531.75	4.31719			1531.75	3.81828
		1585.27	68.119				1585.77	3.126			3021	3.59488				1585.77	3.40691			1532.78	4.31714			1532.78	3.81835
		1586.33	68.1189				1586.83	3.126			3023.02	3.59478				1586.83	3.407			1533.8	4.31719			1533.8	3.8183
		1587.39	68.1189				1587.9	3.126			3025.05	3.59493				1587.9	3.40698			1534.83	4.31709			1534.83	3.81832
		1588.45	68.1189				1588.96	3.12603			3027.07	3.59499				1588.96	3.40684			1535.85	4.31709			1535.85	3.81832
		1589.51	68.1189				1590.02	3.12604			3029.09	3.59502				1590.02	3.40703			1536.88	4.31714			1536.88	3.81829
		1590.57	68.1189				1591.08	3.12601			3031.11	3.59489				1591.08	3.40707			1537.91	4.31719			1537.91	3.81829
		1591.63	68.1189				1592.14	3.12601			3033.14	3.59479				1592.14	3.40712			1538.93	4.31714			1538.93	3.8182
		1592.69	68.1189				1593.2	3.12608			3035.16	3.59495				1593.2	3.40717			1539.96	4.31714			1539.96	3.81826
		1593.75	68.1188				1594.26	3.12608			3037.18	3.595				1594.26	3.40719			1540.98	4.31719			1540.98	3.8182
		1594.81	68.1189				1595.32	3.1261			3039.21	3.59509				1595.32	3.40724			1542.01	4.31719			1542.01	3.81816
		1595.87	68.1189				1596.38	3.12604			3041.23	3.59495				1596.38	3.40722			1543.04	4.31724			1543.04	3.8182
		1596.97	68.1188				1597.45	3.1261			3043.25	3.59489				1597.45	3.40724			1544.06	4.31714			1544.06	3.81819
		1598.03	68.1188				1598.51	3.12605			3045.27	3.59486				1598.51	3.40731			1545.09	4.31719			1545.09	3.81822
		1599.1	68.1187				1599.57	3.12608			3047.3	3.59508				1599.57	3.4075			1546.11	4.31719			1546.11	3.81818
		1600.16	68.1186				1600.63	3.12603			3049.32	3.59494				1600.63	3.40743			1547.14	4.31719			1547.14	3.81818
		1601.22	68.1187				1601.69	3.12609			3051.34	3.59494				1601.69	3.40755			1548.17	4.31709			1548.17	3.81816
		1602.28	68.1186				1602.75	3.1261			3053.37	3.59496				1602.75	3.4075			1549.19	4.31719			1549.19	3.8182
		1603.34	68.1185				1603.81	3.12614			3055.39	3.59478				1603.81	3.40757			1550.22	4.31722			1550.22	3.81818
		1604.4	68.1186				1604.88	3.12615			3057.41	3.59487				1604.88	3.4076			1551.24	4.31723			1551.24	3.81812
		1605.46	68.1186				1605.94	3.12617			3059.43	3.59494				1605.94	3.4076			1552.27	4.3172			1552.27	3.8182
		1606.52	68.1186				1607	3.12612			3061.46	3.59507				1607	3.40755			1553.3	4.31722			1553.3	3.81817
		1607.58	68.1186				1608.06	3.12616			3063.48	3.5949				1608.06	3.40767			1554.32	4.31724			1554.32	3.81816
		1608.64	68.1185				1609.12	3.1262			3065.5	3.59497				1609.12	3.40772			1555.35	4.31725			1555.35	3.8182
		1609.7	68.1187				1610.2	3.1262			3067.52	3.59502				1610.2	3.40776			1556.37	4.31723			1556.37	3.81818
		1610.76	68.1185				1611.27	3.12612			3069.55	3.59507				1611.27	3.40774			1557.4	4.31723			1557.4	3.81817
		1611.82	68.1184				1612.33	3.12621			3071.57	3.59503				1612.33	3.40781			1558.43	4.31724			1558.43	3.81819
		1612.88	68.1184				1613.39	3.1262			3073.59	3.59515				1613.39	3.40786			1559.45	4.31723			1559.45	3.8181
		1613.94	68.1185				1614.45	3.12617			3075.62	3.59523				1614.45	3.40788			1560.48	4.31723			1560.48	3.81819
		1615	68.1184				1615.51	3.12622			3077.64	3.59525				1615.51	3.40788			1561.5	4.31724			1561.5	3.81811
		1616.06	68.1185				1616.57	3.12624			3079.66	3.59532				1616.57	3.40795			1562.53	4.31725			1562.53	3.81811
		1617.15	68.1185				1617.63	3.12621			3081.68	3.59529				1617.63	3.408			1563.56	4.31719			1563.56	3.81812
		1618.21	68.1183				1618.69	3.12622			3083.71	3.59535				1618.69	3.40805			1564.58	4.31724			1564.58	3.81818
		1619.27	68.1183				1619.76	3.12624			3085.73	3.59536				1619.76	3.40781			1565.61	4.3172			1565.61	3.81816
		1620.33	68.1183				1620.82	3.12627			3087.75	3.59535				1620.82	3.40805			1566.63	4.31716			1566.63	3.81811
		1621.39	68.1183				1621.88	3.12626			3089.78	3.59539				1621.88	3.40812			1567.66	4.31719			1567.66	3.8181
		1622.45	68.1181				1622.94	3.12629			3091.8	3.59532				1622.94	3.40798			1568.69	4.31714			1568.69	3.81809
		1623.51	68.118				1624	3.12631			3093.82	3.59533				1624	3.40808			1569.71	4.31717			1569.71	3.81808
		1624.57	68.118				1625.06	3.12629			3095.84	3.59529				1625.06	3.40812			1570.74	4.31719			1570.74	3.81809
		1625.64	68.1182				1626.12	3.12629			3097.87	3.59539				1626.12	3.40819			1571.76	4.31723			1571.76	3.81816
		1626.7	68.118				1627.18	3.12631			3099.89	3.59544				1627.18	3.40817			1572.79	4.31718			1572.79	3.81811
		1627.76	68.1181				1628.25	3.1263			3101.91	3.5954				1628.25	3.40829			1573.82	4.31716			1573.82	3.81811
		1628.82	68.118				1629.31	3.12642			3103.93	3.59534				1629.31	3.40824			1574.84	4.31716			1574.84	3.81806
		1629.88	68.118				1630.37	3.12635			3105.96	3.59529				1630.37	3.40831			1575.87	4.31718			1575.87	3.81807
		1630.94	68.1181				1631.43	3.12633			3107.98	3.5952				1631.43	3.40841			1576.89	4.31718			1576.89	3.81809
		1632	68.1181				1632.49	3.12637			3110	3.59537				1632.49	3.40834			1577.92	4.31712			1577.92	3.81812
		1633.06	68.1181				1633.55	3.12638			3112.03	3.59534				1633.55	3.40839			1578.95	4.31712			1578.95	3.81814
		1634.12	68.1181				1634.61	3.12635			3114.05	3.59536				1634.61	3.40857			1579.97	4.3171			1579.97	3.81806
		1635.18	68.1179				1635.68	3.12638			3116.07	3.59529				1635.68	3.4085			1581	4.3171			1581	3.81806
		1636.24	68.118				1636.74	3.1264			3118.09	3.59527				1636.74	3.40855			1582.02	4.31713			1582.02	3.81813
		1637.37	68.118				1637.8	3.12638			3120.12	3.59532				1637.8	3.4085			1583.05	4.31716			1583.05	3.81806
		1638.43	68.1177				1638.86	3.12641			3122.14	3.59546				1638.86	3.40855			1584.08	4.31718			1584.08	3.81811
		1639.49	68.1177				1639.92	3.12646			3124.16	3.59545				1639.92	3.40855			1585.1	4.31714			1585.1	3.81815
		1640.55	68.1179				1641.05	3.1264			3126.19	3.59532				1641.05	3.40862			1586.13	4.31717			1586.13	3.81812
		1641.61	68.1177				1642.11	3.12638			3128.21	3.59539				1642.11	3.40877			1587.15	4.31712			1587.15	3.81812
		1642.67	68.1177				1643.17	3.12637			3130.23	3.5954				1643.17	3.40881			1588.18	4.31714			1588.18	3.81825
		1643.74	68.1179				1644.23	3.12642			3132.25	3.59542				1644.23	3.40872			1589.21	4.31717			1589.21	3.81811
		1644.8	68.1177				1645.29	3.12642			3134.28	3.59526				1645.29	3.40865			1590.23	4.31715			1590.23	3.81803
		1645.86	68.1177				1646.35	3.12642			3136.3	3.59549				1646.35	3.40872			1591.26	4.31715			1591.26	3.818
		1646.92	68.1178				1647.42	3.12642			3138.32	3.59545				1647.42	3.40874			1592.28	4.31716			1592.28	3.81805
		1647.98	68.1179				1648.48	3.12651			3140.34	3.59547				1648.48	3.40884			1593.31	4.31717			1593.31	3.81805
		1649.04	68.1178				1649.54	3.12646			3142.37	3.59549				1649.54	3.40888			1594.33	4.31717			1594.33	3.81808
		1650.1	68.1178				1650.6	3.12651			3144.39	3.59548				1650.6	3.40881			1595.36	4.31716			1595.36	3.81809
		1651.16	68.1177				1651.66	3.12648			3146.41	3.59558				1651.66	3.40881			1596.39	4.31716			1596.39	3.81809
		1652.22	68.1177				1652.72	3.12642			3148.44	3.59564				1652.72	3.40879			1597.41	4.31717			1597.41	3.81809
		1653.28	68.1177				1653.79	3.12646			3150.46	3.59569				1653.79	3.40896			1598.44	4.31717			1598.44	3.81793
		1654.34	68.1178				1654.85	3.12647			3152.48	3.59566				1654.85	3.40884			1599.46	4.31717			1599.46	3.81794
		1655.4	68.1176				1655.91	3.12651			3154.5	3.59581				1655.91	3.40891			1600.49	4.31716			1600.49	3.81788
		1656.46	68.1176				1656.97	3.12652			3156.53	3.59572				1656.97	3.40889			1601.52	4.3171			1601.52	3.81792
		1657.52	68.1176				1658.03	3.12651			3158.55	3.5957				1658.03	3.40898			1602.54	4.3171			1602.54	3.81779
		1658.58	68.1175				1659.09	3.12647			3160.57	3.59579				1659.09	3.40903			1603.57	4.31712			1603.57	3.81785
		1659.64	68.1175				1660.16	3.12652			3162.6	3.59574				1660.16	3.40903			1604.59	4.31712			1604.59	3.81783
		1660.71	68.1176				1661.22	3.12652			3164.62	3.59585				1661.22	3.40898			1605.62	4.3171			1605.62	3.81786
		1661.77	68.1176				1662.28	3.12651			3166.64	3.59576				1662.28	3.40903			1606.65	4.31711			1606.65	3.81784
		1662.83	68.1174				1663.34	3.12656			3168.66	3.5958				1663.34	3.40907			1607.67	4.31711			1607.67	3.81785
		1663.91	68.1174				1664.4	3.12661			3170.69	3.59583				1664.4	3.40905			1608.7	4.31715			1608.7	3.81785
		1664.97	68.1173				1665.46	3.12661			3172.71	3.59573				1665.46	3.40912			1609.72	4.31707			1609.72	3.81776
		1666.03	68.1174				1666.52	3.12654			3174.73	3.5958				1666.52	3.40915			1610.75	4.31711			1610.75	3.81781
		1667.09	68.1173				1667.59	3.12652			3176.75	3.5957				1667.59	3.40917			1611.78	4.31712			1611.78	3.81773
		1668.15	68.1173				1668.65	3.12659			3178.78	3.59583				1668.65	3.4092			1612.8	4.31714			1612.8	3.81782
		1669.21	68.1173				1669.78	3.12658			3180.8	3.59578				1669.78	3.40912			1613.83	4.31706			1613.83	3.81782
		1670.27	68.1175				1670.84	3.12663			3182.82	3.59575				1670.84	3.4092			1614.85	4.31712			1614.85	3.8178
		1671.33	68.1172				1671.91	3.12664			3184.85	3.59581				1671.91	3.40929			1615.88	4.31706			1615.88	3.81786
		1672.39	68.1172				1672.97	3.12662			3186.87	3.59581				1672.97	3.40924			1616.91	4.31705			1616.91	3.81782
		1673.45	68.1173				1674.03	3.12663			3188.89	3.59585				1674.03	3.4092			1617.93	4.31713			1617.93	3.81782
		1674.51	68.1173				1675.09	3.12664			3190.91	3.59583				1675.09	3.40929			1618.96	4.31708			1618.96	3.81779
		1675.57	68.1171				1676.15	3.12664			3192.94	3.59594				1676.15	3.40941			1619.98	4.31705			1619.98	3.8178
		1676.63	68.1172				1677.21	3.12669			3194.96	3.59594				1677.21	3.40946			1621.01	4.31704			1621.01	3.81783
		1677.7	68.1171				1678.27	3.12666			3196.98	3.59604				1678.27	3.40946			1622.04	4.31705			1622.04	3.81787
		1678.76	68.1171				1679.33	3.12669			3199.01	3.59603				1679.33	3.40936			1623.06	4.31707			1623.06	3.81783
		1679.82	68.117				1680.4	3.12669			3201.03	3.59608				1680.4	3.40936			1624.09	4.31706			1624.09	3.81786
		1680.88	68.1172				1681.46	3.12673			3203.05	3.59592				1681.46	3.40938			1625.11	4.31701			1625.11	3.81787
		1681.94	68.117				1682.52	3.12673			3205.07	3.59611				1682.52	3.40938			1626.14	4.31706			1626.14	3.81784
		1683	68.1169				1683.58	3.12674			3207.1	3.59622				1683.58	3.40948			1627.17	4.31708			1627.17	3.81786
		1684.06	68.1169				1684.64	3.12666			3209.12	3.59604				1684.64	3.40948			1628.19	4.31705			1628.19	3.81783
		1685.12	68.117				1685.7	3.12672			3211.14	3.59615				1685.7	3.40946			1629.22	4.31705			1629.22	3.81786
		1686.19	68.117				1686.76	3.12672			3213.16	3.59611				1686.76	3.40948			1630.24	4.31705			1630.24	3.8179
		1687.25	68.1169				1687.82	3.12673			3215.19	3.59607				1687.82	3.40948			1631.27	4.31706			1631.27	3.81786
		1688.31	68.1169				1688.89	3.12675			3217.21	3.59617				1688.89	3.40943			1632.3	4.31704			1632.3	3.81789
		1689.37	68.117				1689.95	3.12679			3219.23	3.59616				1689.95	3.40965			1633.32	4.31702			1633.32	3.81792
		1690.43	68.1169				1691.01	3.12678			3221.26	3.59616				1691.01	3.4095			1634.35	4.31704			1634.35	3.81789
		1691.49	68.117				1692.07	3.12677			3223.28	3.5962				1692.07	3.40953			1635.37	4.31706			1635.37	3.8179
		1692.55	68.1169				1693.13	3.12678			3225.3	3.59617				1693.13	3.40941			1636.4	4.31706			1636.4	3.81792
		1693.61	68.1168				1694.24	3.12684			3227.32	3.59624				1694.24	3.40957			1637.43	4.31708			1637.43	3.81786
		1694.67	68.1167				1695.3	3.1268			3229.35	3.59614				1695.3	3.4095			1638.45	4.31708			1638.45	3.8179
		1695.73	68.1169				1696.36	3.12678			3231.37	3.59615				1696.36	3.40957			1639.48	4.31706			1639.48	3.81788
		1696.8	68.1168				1697.42	3.1268			3233.39	3.59628				1697.42	3.40972			1640.5	4.31706			1640.5	3.81788
		1697.86	68.1166				1698.48	3.12679			3235.42	3.59621				1698.48	3.40957			1641.53	4.31706			1641.53	3.81784
		1698.92	68.1167				1699.54	3.12682			3237.44	3.59635				1699.54	3.40953			1642.56	4.31708			1642.56	3.81784
		1699.98	68.1166				1700.6	3.12682			3239.46	3.59635				1700.6	3.40946			1643.58	4.3171			1643.58	3.81792
		1701.04	68.1166				1701.66	3.1269			3241.48	3.59632				1701.66	3.40965			1644.61	4.31707			1644.61	3.81793
		1702.1	68.1166				1702.72	3.12689			3243.51	3.59647				1702.72	3.40946			1645.63	4.31706			1645.63	3.81781
		1703.16	68.1165				1703.78	3.12688			3245.53	3.59631				1703.78	3.40953			1646.66	4.31708			1646.66	3.81786
		1704.22	68.1164				1704.85	3.1269			3247.55	3.59639				1704.85	3.40962			1647.69	4.31708			1647.69	3.81789
		1705.28	68.1165				1705.91	3.12685			3249.57	3.59639				1705.91	3.40976			1648.71	4.31712			1648.71	3.81795
		1706.34	68.1166				1706.97	3.1269			3251.6	3.59652				1706.97	3.40972			1649.74	4.31709			1649.74	3.81791
		1707.4	68.1165				1708.03	3.12684			3253.62	3.59642				1708.03	3.40965			1650.76	4.31702			1650.76	3.81796
		1708.46	68.1164				1709.09	3.12692			3255.64	3.59647				1709.09	3.40957			1651.79	4.31709			1651.79	3.81786
		1709.52	68.1163				1710.15	3.12689			3257.67	3.59638				1710.15	3.40953			1652.82	4.31705			1652.82	3.81797
		1710.58	68.1165				1711.21	3.12687			3259.69	3.59647				1711.21	3.40957			1653.84	4.31702			1653.84	3.81793
		1711.64	68.1163				1712.27	3.1269			3261.71	3.59643				1712.27	3.40964			1654.87	4.31701			1654.87	3.81793
		1712.71	68.1163				1713.33	3.12693			3263.73	3.59667				1713.33	3.40962			1655.89	4.31704			1655.89	3.81797
		1713.77	68.1164				1714.47	3.12693			3265.76	3.59676				1714.47	3.40964			1656.92	4.31702			1656.92	3.81791
		1714.83	68.1163				1715.53	3.12698			3267.78	3.59687				1715.53	3.40962			1657.95	4.31703			1657.95	3.81795
		1715.89	68.1162				1716.59	3.1269			3269.8	3.59693				1716.59	3.40967			1658.97	4.317			1658.97	3.81798
		1716.95	68.1161				1717.65	3.12699			3271.83	3.59684				1717.65	3.40971			1660	4.31698			1660	3.81793
		1718.01	68.1161				1718.72	3.12695			3273.85	3.59676				1718.72	3.40986			1661.02	4.31704			1661.02	3.81786
		1719.09	68.1162				1719.78	3.12693			3275.87	3.59677				1719.78	3.40978			1662.05	4.31701			1662.05	3.81787
		1720.15	68.1161				1720.84	3.12698			3277.89	3.59684				1720.84	3.40981			1663.08	4.31702			1663.08	3.81789
		1721.21	68.1161				1721.9	3.12701			3279.92	3.59704				1721.9	3.40974			1664.1	4.31698			1664.1	3.81788
		1722.27	68.116				1722.96	3.12701			3281.94	3.59701				1722.96	3.40981			1665.13	4.31699			1665.13	3.81796
		1723.33	68.1162				1724.02	3.12694			3283.96	3.59698				1724.02	3.40986			1666.15	4.31705			1666.15	3.8179
		1724.39	68.116				1725.08	3.12699			3285.98	3.59703				1725.08	3.40978			1667.18	4.31696			1667.18	3.8179
		1725.45	68.1159				1726.14	3.12701			3288.01	3.59706				1726.14	3.40986			1668.21	4.31694			1668.21	3.81794
		1726.51	68.116				1727.2	3.12701			3290.03	3.59699				1727.2	3.40986			1669.23	4.31692			1669.23	3.81793
		1727.58	68.1157				1728.26	3.12703			3292.05	3.59698				1728.26	3.40979			1670.26	4.31693			1670.26	3.81798
		1728.64	68.1159				1729.33	3.12701			3294.08	3.59701				1729.33	3.40993			1671.28	4.31697			1671.28	3.818
		1729.7	68.1157				1730.39	3.12699			3296.1	3.59713				1730.39	3.40993			1672.31	4.31695			1672.31	3.81797
		1730.76	68.1159				1731.45	3.12703			3298.12	3.59719				1731.45	3.40995			1673.34	4.31692			1673.34	3.818
		1731.82	68.116				1732.59	3.12699			3300.14	3.59715				1732.59	3.40993			1674.36	4.31692			1674.36	3.81799
		1732.88	68.1159				1733.65	3.12705			3302.17	3.59707				1733.65	3.41002			1675.39	4.31682			1675.39	3.81801
		1733.94	68.1158				1734.71	3.12708			3304.19	3.59699				1734.71	3.40986			1676.41	4.31689			1676.41	3.81804
		1735	68.1158				1735.77	3.12701			3306.21	3.59714				1735.77	3.40988			1677.44	4.31692			1677.44	3.81797
		1736.06	68.1157				1736.83	3.12708			3308.24	3.59719				1736.83	3.40986			1678.46	4.31685			1678.46	3.818
		1737.12	68.1159				1737.89	3.12711			3310.26	3.59724				1737.89	3.40995			1679.49	4.31685			1679.49	3.81803
		1738.18	68.116				1738.96	3.12705			3312.28	3.59724				1738.96	3.40986			1680.52	4.31686			1680.52	3.81799
		1739.24	68.1159				1740.02	3.12707			3314.3	3.59721				1740.02	3.40988			1681.54	4.31691			1681.54	3.81797
		1740.31	68.1159				1741.08	3.12711			3316.33	3.59702				1741.08	3.40996			1682.57	4.31689			1682.57	3.81798
		1741.37	68.1157				1742.14	3.12707			3318.35	3.59708				1742.14	3.40993			1683.59	4.31686			1683.59	3.81808
		1742.43	68.1156				1743.2	3.12706			3320.37	3.59707				1743.2	3.40995			1684.62	4.31688			1684.62	3.81792
		1743.49	68.1157				1744.26	3.12706			3322.39	3.5972				1744.26	3.40988			1685.65	4.31684			1685.65	3.81796
		1744.55	68.1154				1745.32	3.12706			3324.42	3.59724				1745.32	3.40988			1686.67	4.31687			1686.67	3.818
		1745.61	68.1156				1746.38	3.12701			3326.44	3.59712				1746.38	3.40993			1687.7	4.3168			1687.7	3.81797
		1746.67	68.1156				1747.44	3.1271			3328.46	3.59708				1747.44	3.40993			1688.72	4.31678			1688.72	3.81798
		1747.73	68.1156				1748.51	3.12706			3330.49	3.59711				1748.51	3.40995			1689.75	4.31679			1689.75	3.81805
		1748.79	68.1156				1749.57	3.12707			3332.51	3.59707				1749.57	3.40993			1690.78	4.31682			1690.78	3.81809
		1749.85	68.1154				1750.63	3.12707			3334.53	3.59724				1750.63	3.40988			1691.8	4.3168			1691.8	3.81811
		1750.91	68.1154				1751.69	3.12714			3336.55	3.59734				1751.69	3.41003			1692.83	4.3167			1692.83	3.81814
		1751.97	68.1154				1752.75	3.12708			3338.58	3.59735				1752.75	3.40993			1693.85	4.31672			1693.85	3.81814
		1753.03	68.1155				1753.81	3.12711			3340.6	3.59741				1753.81	3.40993			1694.88	4.31673			1694.88	3.8181
		1754.09	68.1154				1754.87	3.1271			3342.62	3.59734				1754.87	3.41002			1695.91	4.31671			1695.91	3.81816
		1755.15	68.1153				1755.93	3.12708			3344.65	3.59756				1755.93	3.40993			1696.93	4.31671			1696.93	3.81814
		1756.21	68.1153				1757	3.12711			3346.67	3.59749				1757	3.40993			1697.96	4.31673			1697.96	3.81809
		1757.27	68.1151				1758.06	3.12711			3348.69	3.59748				1758.06	3.41005			1698.98	4.31674			1698.98	3.81814
		1758.33	68.1151				1759.12	3.1271			3350.71	3.59761				1759.12	3.41002			1700.01	4.31663			1700.01	3.81815
		1759.39	68.1153				1760.18	3.1271			3352.74	3.59765				1760.18	3.41002			1701.04	4.31666			1701.04	3.8181
		1760.46	68.1153				1761.24	3.12712			3354.76	3.59773				1761.24	3.40998			1702.06	4.31667			1702.06	3.81815
		1761.52	68.1151				1762.3	3.12709			3356.78	3.59776				1762.3	3.41005			1703.09	4.31665			1703.09	3.81811
		1762.58	68.1151				1763.37	3.12706			3358.8	3.59762				1763.37	3.41002			1704.11	4.31668			1704.11	3.81818
		1763.64	68.1151				1764.43	3.12714			3360.83	3.59767				1764.43	3.41002			1705.14	4.31665			1705.14	3.81813
		1764.7	68.1151				1765.49	3.12711			3362.85	3.59776				1765.49	3.41003			1706.17	4.31662			1706.17	3.81807
		1765.76	68.1151				1766.55	3.12715			3364.87	3.59766				1766.55	3.41005			1707.19	4.31662			1707.19	3.81808
		1766.82	68.1151				1767.61	3.1271			3366.9	3.59761				1767.61	3.41003			1708.22	4.31665			1708.22	3.81812
		1767.88	68.1152				1768.67	3.12712			3368.92	3.59766				1768.67	3.41012			1709.24	4.31664			1709.24	3.81812
		1768.94	68.115				1769.74	3.12714			3370.94	3.59767				1769.74	3.41012			1710.27	4.31656			1710.27	3.81821
		1770	68.115				1770.8	3.12714			3372.96	3.59759				1770.8	3.41003			1711.3	4.31651			1711.3	3.81804
		1771.06	68.1149				1771.86	3.12707			3374.99	3.59771				1771.86	3.41005			1712.32	4.31658			1712.32	3.81807
		1772.12	68.115				1772.92	3.12711			3377.01	3.59772				1772.92	3.40998			1713.35	4.31658			1713.35	3.81808
		1773.19	68.115				1773.98	3.12716			3379.03	3.59768				1773.98	3.41015			1714.37	4.3166			1714.37	3.81807
		1774.25	68.115				1775.04	3.1271			3381.06	3.59757				1775.04	3.4101			1715.4	4.31658			1715.4	3.81814
		1775.31	68.1149				1776.1	3.12711			3383.08	3.59766				1776.1	3.41026			1716.43	4.3166			1716.43	3.8182
		1776.37	68.1148				1777.16	3.12712			3385.1	3.59779				1777.16	3.41005			1717.45	4.31655			1717.45	3.81812
		1777.43	68.1148				1778.22	3.12711			3387.12	3.59769				1778.22	3.41007			1718.48	4.31654			1718.48	3.81816
		1778.49	68.1149				1779.29	3.12716			3389.15	3.59778				1779.29	3.41009			1719.5	4.31657			1719.5	3.81816
		1779.55	68.115				1780.35	3.12715			3391.17	3.59777				1780.35	3.4101			1720.53	4.31655			1720.53	3.81822
		1780.61	68.1149				1781.41	3.12711			3393.19	3.59782				1781.41	3.41012			1721.56	4.31653			1721.56	3.81815
		1781.67	68.1149				1782.47	3.1271			3395.21	3.59776				1782.47	3.4101			1722.58	4.3165			1722.58	3.81821
		1782.73	68.1147				1783.53	3.12705			3397.24	3.59776				1783.53	3.41014			1723.61	4.3165			1723.61	3.81814
		1783.79	68.1148				1784.59	3.12714			3399.26	3.59784				1784.59	3.41021			1724.63	4.3165			1724.63	3.81815
		1784.85	68.1148				1785.66	3.12711			3401.28	3.59776				1785.66	3.41002			1725.66	4.3165			1725.66	3.81827
		1785.91	68.1145				1786.72	3.12706			3403.31	3.59774				1786.72	3.40998			1726.69	4.31645			1726.69	3.81822
		1786.97	68.1146				1787.78	3.12707			3405.33	3.59785				1787.78	3.4101			1727.71	4.31645			1727.71	3.81814
		1788.03	68.1145				1788.84	3.12706			3407.35	3.59787				1788.84	3.41012			1728.74	4.31654			1728.74	3.81821
		1789.09	68.1147				1789.9	3.12707			3409.37	3.59779				1789.9	3.41009			1729.76	4.31649			1729.76	3.81825
		1790.15	68.1147				1790.96	3.12705			3411.4	3.5977				1790.96	3.41014			1730.79	4.31651			1730.79	3.81825
		1791.21	68.1146				1792.02	3.12706			3413.42	3.59788				1792.02	3.41009			1731.82	4.3165			1731.82	3.81821
		1792.27	68.1145				1793.09	3.12699			3415.44	3.59786				1793.09	3.41007			1732.84	4.31648			1732.84	3.81821
		1793.33	68.1145				1794.15	3.12701			3417.47	3.59781				1794.15	3.41021			1733.87	4.3165			1733.87	3.81821
		1794.43	68.1146				1795.21	3.12703			3419.49	3.59785				1795.21	3.41026			1734.89	4.31652			1734.89	3.8182
		1795.49	68.1145				1796.27	3.12707			3421.51	3.59797				1796.27	3.41019			1735.92	4.3165			1735.92	3.8182
		1796.55	68.1144				1797.33	3.127			3423.53	3.59789				1797.33	3.41012			1736.95	4.31654			1736.95	3.8182
		1797.61	68.1145				1798.39	3.12705			3425.56	3.59805				1798.39	3.41009			1737.97	4.31648			1737.97	3.8182
		1798.67	68.1144				1799.54	3.12703			3427.58	3.59799				1799.54	3.41021			1739	4.31653			1739	3.81827
		1799.73	68.1146				1800.6	3.127			3429.6	3.59803				1800.6	3.41019			1740.02	4.31649			1740.02	3.81832
		1800.79	68.1142				1801.66	3.12704			3431.62	3.5981				1801.66	3.41019			1741.05	4.31642			1741.05	3.81824
		1801.85	68.1136				1802.72	3.12701			3433.65	3.59826				1802.72	3.41002			1742.08	4.31635			1742.08	3.81834
		1802.91	68.1136				1803.78	3.12707			3435.67	3.59818				1803.78	3.41012			1743.1	4.31638			1743.1	3.81833
		1803.97	68.1139				1804.84	3.12698			3437.69	3.59816				1804.84	3.41021			1744.13	4.31635			1744.13	3.81833
		1805.03	68.1139				1805.9	3.12694			3439.72	3.59814				1805.9	3.41024			1745.15	4.31636			1745.15	3.8183
		1806.09	68.114				1806.96	3.12699			3441.74	3.59815				1806.96	3.41021			1746.18	4.31638			1746.18	3.81832
		1807.15	68.1141				1808.03	3.12701			3443.76	3.59827				1808.03	3.41031			1747.21	4.31633			1747.21	3.81828
		1808.21	68.1141				1809.09	3.12699			3445.78	3.59829				1809.09	3.41026			1748.23	4.31638			1748.23	3.81826
		1809.27	68.1139				1810.15	3.12696			3447.81	3.59824				1810.15	3.41014			1749.26	4.31633			1749.26	3.81825
		1810.33	68.114				1811.21	3.12705			3449.83	3.59828				1811.21	3.41026			1750.28	4.31639			1750.28	3.81823
		1811.39	68.1142				1812.27	3.12705			3451.85	3.59832				1812.27	3.41014			1751.31	4.31632			1751.31	3.81821
		1812.45	68.1142				1813.33	3.12701			3453.88	3.59822				1813.33	3.41021			1752.34	4.31629			1752.34	3.81826
		1813.52	68.114				1814.39	3.12701			3455.9	3.59833				1814.39	3.41014			1753.36	4.31638			1753.36	3.81821
		1814.58	68.1143				1815.45	3.12696			3457.92	3.59835				1815.45	3.41021			1754.39	4.3164			1754.39	3.81822
		1815.64	68.1141				1816.52	3.12697			3459.94	3.59835				1816.52	3.41028			1755.41	4.31638			1755.41	3.81822
		1816.7	68.1142				1817.58	3.12697			3461.97	3.59839				1817.58	3.41026			1756.44	4.31636			1756.44	3.81821
		1817.76	68.1142				1818.64	3.12696			3463.99	3.59834				1818.64	3.41021			1757.47	4.31635			1757.47	3.81822
		1818.82	68.1141				1819.7	3.12698			3466.01	3.59836				1819.7	3.41028			1758.49	4.31637			1758.49	3.81819
		1819.88	68.114				1820.76	3.12694			3468.03	3.59837				1820.76	3.41026			1759.52	4.31632			1759.52	3.81825
		1820.94	68.1141				1821.82	3.12693			3470.06	3.59836				1821.82	3.41026			1760.54	4.31633			1760.54	3.81822
		1822	68.1141				1822.88	3.1269			3472.08	3.59827				1822.88	3.41026			1761.57	4.31636			1761.57	3.81827
		1823.06	68.114				1823.94	3.12696			3474.1	3.59818				1823.94	3.41017			1762.6	4.31635			1762.6	3.81822
		1824.12	68.114				1825.01	3.12686			3476.13	3.59848				1825.01	3.40985			1763.62	4.31631			1763.62	3.81835
		1825.19	68.114				1826.07	3.12686			3478.15	3.59828				1826.07	3.40978			1764.65	4.31635			1764.65	3.81834
		1826.25	68.1139				1827.13	3.12686			3480.17	3.59823				1827.13	3.40976			1765.67	4.31631			1765.67	3.81827
		1827.31	68.1139				1828.21	3.12685			3482.19	3.59831				1828.21	3.40954			1766.7	4.31634			1766.7	3.81825
		1828.37	68.1141				1829.27	3.12685			3484.22	3.5983				1829.27	3.4095			1767.73	4.31635			1767.73	3.81829
		1829.43	68.114				1830.33	3.12684			3486.24	3.59823				1830.33	3.40945			1768.75	4.3163			1768.75	3.81831
		1830.49	68.1139				1831.39	3.12693			3488.26	3.59809				1831.39	3.40938			1769.78	4.3163			1769.78	3.81828
		1831.55	68.1138				1832.45	3.12689			3490.29	3.59819				1832.45	3.40931			1770.8	4.31628			1770.8	3.81832
		1832.61	68.1138				1833.51	3.12689			3492.31	3.59822				1833.51	3.40907			1771.83	4.31627			1771.83	3.81829
		1833.67	68.1139				1834.57	3.12689			3494.33	3.59824				1834.57	3.40909			1772.86	4.31628			1772.86	3.81829
		1834.73	68.114				1835.63	3.12686			3496.35	3.59807				1835.63	3.40904			1773.88	4.31626			1773.88	3.81831
		1835.79	68.1139				1836.69	3.12688			3498.38	3.59804				1836.69	3.40883			1774.91	4.31632			1774.91	3.81829
		1836.85	68.1139				1837.76	3.1269			3500.4	3.59816				1837.76	3.40895			1775.93	4.31629			1775.93	3.81827
		1837.92	68.1137				1838.82	3.12684			3502.42	3.59818				1838.82	3.4088			1776.96	4.31631			1776.96	3.81824
		1838.98	68.1138				1839.88	3.12686			3504.44	3.59816				1839.88	3.40866			1777.99	4.31629			1777.99	3.81829
		1840.04	68.1138				1840.94	3.12686			3506.47	3.59824				1840.94	3.40864			1779.01	4.31627			1779.01	3.81829
		1841.1	68.1138				1842	3.12689			3508.49	3.59813				1842	3.40849			1780.04	4.31627			1780.04	3.81825
		1842.16	68.1136				1843.06	3.12686			3510.51	3.5982				1843.06	3.40856			1781.06	4.31631			1781.06	3.81824
		1843.22	68.1135				1844.12	3.12689			3512.54	3.59818				1844.12	3.40842			1782.09	4.31619			1782.09	3.81832
		1844.28	68.1136				1845.19	3.1269			3514.56	3.59808				1845.19	3.4083			1783.12	4.31623			1783.12	3.81833
		1845.34	68.1135				1846.25	3.12684			3516.58	3.5981				1846.25	3.40816			1784.14	4.31618			1784.14	3.81835
		1846.4	68.1136				1847.31	3.12682			3518.6	3.59813				1847.31	3.40828			1785.17	4.31619			1785.17	3.8184
		1847.46	68.1135				1848.44	3.12689			3520.63	3.59812				1848.44	3.40799			1786.19	4.31619			1786.19	3.81837
		1848.52	68.1135				1849.5	3.12693			3522.65	3.59807				1849.5	3.40799			1787.22	4.31624			1787.22	3.81839
		1849.58	68.1134				1850.56	3.12684			3524.67	3.59812				1850.56	3.40787			1788.24	4.31617			1788.24	3.81836
		1850.64	68.1135				1851.62	3.12684			3526.7	3.59818				1851.62	3.40778			1789.27	4.31623			1789.27	3.81838
		1851.73	68.1134				1852.68	3.12685			3528.72	3.59799				1852.68	3.40773			1790.3	4.31617			1790.3	3.81835
		1852.79	68.1134				1853.74	3.12686			3530.74	3.59807				1853.74	3.40766			1791.32	4.31627			1791.32	3.81834
		1853.86	68.1135				1854.8	3.12678			3532.76	3.59795				1854.8	3.40754			1792.35	4.31623			1792.35	3.81833
		1854.92	68.1132				1855.87	3.12677			3534.79	3.59799				1855.87	3.40737			1793.38	4.31617			1793.38	3.81833
		1855.98	68.1133				1856.93	3.12681			3536.81	3.59791				1856.93	3.40735			1794.4	4.31621			1794.4	3.81841
		1857.04	68.1132				1857.99	3.12679			3538.83	3.59795				1857.99	3.40716			1795.43	4.3162			1795.43	3.81828
		1858.1	68.1132				1859.05	3.1268			3540.85	3.5978				1859.05	3.40713			1796.45	4.31612			1796.45	3.81834
		1859.16	68.1133				1860.11	3.12677			3542.88	3.59775				1860.11	3.40702			1797.48	4.31616			1797.48	3.81837
		1860.22	68.1132				1861.17	3.1268			3544.9	3.59776				1861.17	3.40692			1798.5	4.3162			1798.5	3.81837
		1861.28	68.1133				1862.23	3.1268			3546.92	3.5978				1862.23	3.40685			1799.53	4.31615			1799.53	3.81834
		1862.34	68.1132				1863.29	3.12678			3548.95	3.59775				1863.29	3.4068			1800.56	4.31618			1800.56	3.81837
		1863.4	68.1132				1864.35	3.12677			3550.97	3.59769				1864.35	3.40677			1801.58	4.31609			1801.58	3.81826
		1864.46	68.113				1865.41	3.12678			3552.99	3.59785				1865.41	3.40644			1802.61	4.31608			1802.61	3.81837
		1865.52	68.1131				1866.47	3.1268			3555.01	3.59775				1866.47	3.40651			1803.63	4.31606			1803.63	3.81832
		1866.58	68.1131				1867.53	3.12677			3557.04	3.59767				1867.53	3.40652			1804.66	4.31609			1804.66	3.81833
		1867.64	68.1131				1868.65	3.12679			3559.06	3.59775				1868.65	3.40628			1805.69	4.31607			1805.69	3.81836
		1868.7	68.1129				1869.72	3.12678			3561.08	3.59769				1869.72	3.40623			1806.71	4.31605			1806.71	3.81837
		1869.76	68.1131				1870.83	3.12678			3563.11	3.59768				1870.83	3.40606			1807.74	4.31607			1807.74	3.81838
		1870.82	68.1128				1871.89	3.12683			3565.13	3.59773				1871.89	3.40611			1808.76	4.3161			1808.76	3.81834
		1871.88	68.1128				1872.95	3.12675			3567.15	3.59764				1872.95	3.40594			1809.79	4.31611			1809.79	3.8184
		1872.94	68.1127				1874.01	3.12675			3569.17	3.59766				1874.01	3.40587			1810.82	4.31603			1810.82	3.81835
		1874.01	68.1126				1875.07	3.12672			3571.2	3.59759				1875.07	3.40587			1811.84	4.31601			1811.84	3.81834
		1875.07	68.1126				1876.13	3.12678			3573.22	3.59756				1876.13	3.40577			1812.87	4.31611			1812.87	3.81831
		1876.13	68.1126				1877.19	3.12677			3575.24	3.5976				1877.19	3.40558			1813.89	4.31605			1813.89	3.81837
		1877.19	68.1125				1878.26	3.12674			3577.26	3.5976				1878.26	3.40554			1814.92	4.31601			1814.92	3.81836
		1878.27	68.1124				1879.32	3.12675			3579.29	3.59755				1879.32	3.40535			1815.95	4.31604			1815.95	3.81837
		1879.33	68.1126				1880.38	3.12673			3581.31	3.59747				1880.38	3.40528			1816.97	4.31604			1816.97	3.81831
		1880.39	68.1125				1881.44	3.12672			3583.33	3.59737				1881.44	3.40508			1818	4.31603			1818	3.81834
		1881.45	68.1124				1882.5	3.12672			3585.36	3.59738				1882.5	3.40511			1819.02	4.31603			1819.02	3.81828
		1882.51	68.1124				1883.56	3.12669			3587.38	3.59737				1883.56	3.40501			1820.05	4.31601			1820.05	3.81828
		1883.57	68.1124				1884.62	3.12669			3589.4	3.59747				1884.62	3.40494			1821.08	4.31598			1821.08	3.81835
		1884.63	68.1123				1885.68	3.12672			3591.42	3.59747				1885.68	3.40484			1822.1	4.31601			1822.1	3.81835
		1885.69	68.1122				1886.74	3.12669			3593.45	3.5974				1886.74	3.40477			1823.13	4.31599			1823.13	3.81831
		1886.75	68.1121				1887.8	3.12674			3595.47	3.59739				1887.8	3.40463			1824.15	4.31599			1824.15	3.81833
		1887.81	68.1123				1888.86	3.12669			3597.49	3.59739				1888.86	3.40458			1825.18	4.31602			1825.18	3.81831
		1888.87	68.1121				1889.93	3.12668			3599.52	3.59738				1889.93	3.40451			1826.21	4.31595			1826.21	3.81823
		1889.93	68.1123				1890.99	3.12667			3601.54	3.59742				1890.99	3.40444			1827.23	4.31602			1827.23	3.81831
		1890.99	68.1122				1892.05	3.12669			3603.56	3.59734				1892.05	3.40427			1828.26	4.31595			1828.26	3.81828
		1892.05	68.1121				1893.11	3.12669			3605.58	3.59736				1893.11	3.40427			1829.28	4.31593			1829.28	3.81832
		1893.11	68.1119				1894.17	3.12671			3607.61	3.59734				1894.17	3.40418			1830.31	4.31593			1830.31	3.81829
		1894.17	68.1119				1895.23	3.12673			3609.63	3.59733				1895.23	3.40408			1831.34	4.31595			1831.34	3.81837
		1895.23	68.1118				1896.3	3.12669			3611.65	3.5972				1896.3	3.40394			1832.36	4.31596			1832.36	3.81826
		1896.29	68.1117				1897.36	3.12669			3613.67	3.59721				1897.36	3.40392			1833.39	4.31597			1833.39	3.81826
		1897.35	68.1118				1898.42	3.12667			3615.7	3.59723				1898.42	3.40382			1834.41	4.31591			1834.41	3.81824
		1898.41	68.1117				1899.48	3.1266			3617.72	3.59718				1899.48	3.40372			1835.44	4.31589			1835.44	3.81829
		1899.48	68.1117				1900.54	3.12667			3619.74	3.59721				1900.54	3.40365			1836.47	4.31594			1836.47	3.81829
		1900.54	68.1117				1901.6	3.12664			3621.77	3.59713				1901.6	3.40363			1837.49	4.31586			1837.49	3.81834
		1901.6	68.1116				1902.66	3.12665			3623.79	3.59711				1902.66	3.40353			1838.52	4.31584			1838.52	3.81839
		1902.66	68.1117				1903.72	3.12664			3625.81	3.597				1903.72	3.40348			1839.54	4.3159			1839.54	3.81838
		1903.72	68.1117				1904.79	3.12665			3627.83	3.59711				1904.79	3.40336			1840.57	4.31587			1840.57	3.8183
		1904.78	68.1115				1905.85	3.12666			3629.86	3.5971				1905.85	3.40332			1841.6	4.31584			1841.6	3.81833
		1905.84	68.1114				1906.91	3.1266			3631.88	3.59701				1906.91	3.40305			1842.62	4.31585			1842.62	3.8184
		1906.97	68.1115				1907.97	3.12667			3633.9	3.59714				1907.97	3.4032			1843.65	4.31584			1843.65	3.81837
		1908.03	68.1114				1909.03	3.12668			3635.93	3.59693				1909.03	3.40303			1844.67	4.31581			1844.67	3.81838
		1909.09	68.1115				1910.09	3.12663			3637.95	3.59692				1910.09	3.40298			1845.7	4.3158			1845.7	3.81839
		1910.15	68.1113				1911.15	3.12663			3639.97	3.59694				1911.15	3.40279			1846.73	4.31579			1846.73	3.81835
		1911.21	68.1114				1912.21	3.12669			3641.99	3.59683				1912.21	3.40279			1847.75	4.31579			1847.75	3.81841
		1912.27	68.1114				1913.28	3.1266			3644.02	3.5968				1913.28	3.40267			1848.78	4.31572			1848.78	3.81841
		1913.33	68.1112				1914.34	3.1266			3646.04	3.59681				1914.34	3.40265			1849.8	4.31574			1849.8	3.81839
		1914.4	68.1112				1915.4	3.12655			3648.06	3.59677				1915.4	3.40263			1850.83	4.3157			1850.83	3.81842
		1915.46	68.1111				1916.46	3.12655			3650.08	3.59683				1916.46	3.40251			1851.86	4.31575			1851.86	3.81839
		1916.52	68.111				1917.52	3.12658			3652.11	3.5968				1917.52	3.40243			1852.88	4.31566			1852.88	3.8183
		1917.58	68.1111				1918.58	3.12655			3654.13	3.59674				1918.58	3.40229			1853.91	4.31574			1853.91	3.81832
		1918.64	68.1109				1919.64	3.12654			3656.15	3.59677				1919.64	3.40238			1854.93	4.31577			1854.93	3.81833
		1919.7	68.1109				1920.7	3.12659			3658.18	3.59676				1920.7	3.40234			1855.96	4.31572			1855.96	3.81838
		1920.76	68.1109				1921.77	3.1266			3660.2	3.59672				1921.77	3.40217			1856.99	4.31566			1856.99	3.81835
		1921.82	68.1107				1922.83	3.12658			3662.22	3.59671				1922.83	3.40208			1858.01	4.31571			1858.01	3.81834
		1922.88	68.1107				1923.91	3.12658			3664.24	3.59659				1923.91	3.40198			1859.04	4.31571			1859.04	3.81829
		1923.94	68.1106				1924.97	3.12647			3666.27	3.59647				1924.97	3.40191			1860.06	4.31572			1860.06	3.81828
		1925	68.1106				1926.03	3.12657			3668.29	3.59661				1926.03	3.40182			1861.09	4.31565			1861.09	3.81834
		1926.06	68.1107				1927.09	3.12648			3670.31	3.59644				1927.09	3.40174			1862.12	4.31567			1862.12	3.81835
		1927.12	68.1107				1928.15	3.12658			3672.34	3.59654				1928.15	3.40172			1863.14	4.31563			1863.14	3.81835
		1928.18	68.1106				1929.22	3.12648			3674.36	3.59639				1929.22	3.4016			1864.17	4.31564			1864.17	3.8184
		1929.24	68.1106				1930.28	3.12652			3676.38	3.59631				1930.28	3.4016			1865.19	4.31567			1865.19	3.81839
		1930.3	68.1104				1931.34	3.12652			3678.4	3.59628				1931.34	3.40143			1866.22	4.31567			1866.22	3.81832
		1931.36	68.1105				1932.4	3.1265			3680.43	3.59626				1932.4	3.40143			1867.25	4.31569			1867.25	3.81841
		1932.43	68.1106				1933.47	3.12652			3682.45	3.59624				1933.47	3.40131			1868.27	4.31563			1868.27	3.81837
		1933.5	68.1103				1934.53	3.12648			3684.47	3.59625				1934.53	3.40129			1869.3	4.31561			1869.3	3.81837
		1934.56	68.1102				1935.59	3.1265			3686.49	3.59626				1935.59	3.40124			1870.32	4.31558			1870.32	3.81835
		1935.62	68.1103				1936.65	3.12648			3688.52	3.59608				1936.65	3.40117			1871.35	4.31558			1871.35	3.81831
		1936.68	68.1102				1937.71	3.12639			3690.54	3.5961				1937.71	3.4011			1872.38	4.31557			1872.38	3.81833
		1937.74	68.1102				1938.77	3.12647			3692.56	3.59598				1938.77	3.401			1873.4	4.31554			1873.4	3.81837
		1938.8	68.1101				1939.83	3.12645			3694.59	3.59595				1939.83	3.40088			1874.43	4.31546			1874.43	3.81841
		1939.86	68.1103				1940.89	3.12646			3696.61	3.59597				1940.89	3.40086			1875.45	4.31552			1875.45	3.81834
		1940.92	68.1101				1941.95	3.12643			3698.63	3.59609				1941.95	3.40084			1876.48	4.31543			1876.48	3.81838
		1941.98	68.1101				1943.01	3.12643			3700.65	3.59603				1943.01	3.40069			1877.51	4.31547			1877.51	3.81837
		1943.04	68.1101				1944.08	3.12643			3702.68	3.59591				1944.08	3.4006			1878.53	4.31548			1878.53	3.81831
		1944.1	68.1098				1945.14	3.12642			3704.7	3.59588				1945.14	3.4006			1879.56	4.31546			1879.56	3.81837
		1945.17	68.1096				1946.23	3.12648			3706.72	3.5959				1946.23	3.40057			1880.58	4.31541			1880.58	3.81841
		1946.23	68.1098				1947.29	3.12647			3708.75	3.59584				1947.29	3.40036			1881.61	4.31545			1881.61	3.81832
		1947.29	68.1096				1948.35	3.12639			3710.77	3.59576				1948.35	3.40043			1882.64	4.31537			1882.64	3.81847
		1948.35	68.1098				1949.41	3.12639			3712.79	3.59566				1949.41	3.40017			1883.66	4.31539			1883.66	3.81847
		1949.41	68.1097				1950.47	3.12645			3714.81	3.5957				1950.47	3.40017			1884.69	4.31546			1884.69	3.81845
		1950.47	68.1095				1951.53	3.12643			3716.84	3.59578				1951.53	3.40031			1885.71	4.31532			1885.71	3.81845
		1951.53	68.1096				1952.6	3.12645			3718.86	3.59569				1952.6	3.40007			1886.74	4.31541			1886.74	3.8184
		1952.59	68.1096				1953.66	3.12638			3720.88	3.5957				1953.66	3.40007			1887.77	4.31543			1887.77	3.81846
		1953.73	68.1095				1954.72	3.12638			3722.9	3.59569				1954.72	3.40003			1888.79	4.31544			1888.79	3.8184
		1954.79	68.1094				1955.78	3.12642			3724.93	3.59567				1955.78	3.39995			1889.82	4.31535			1889.82	3.81845
		1955.85	68.1094				1956.84	3.12643			3726.95	3.59556				1956.84	3.39991			1890.84	4.31534			1890.84	3.81845
		1956.91	68.1094				1957.9	3.12642			3728.97	3.59559				1957.9	3.39983			1891.87	4.31534			1891.87	3.81842
		1957.97	68.1092				1958.96	3.12638			3731	3.59558				1958.96	3.39972			1892.9	4.31534			1892.9	3.81851
		1959.03	68.1092				1960.02	3.12638			3733.02	3.59556				1960.02	3.39962			1893.92	4.31531			1893.92	3.81852
		1960.09	68.1091				1961.08	3.12638			3735.04	3.59542				1961.08	3.3995			1894.95	4.31536			1894.95	3.81857
		1961.16	68.1092				1962.14	3.12646			3737.06	3.59546				1962.14	3.3996			1895.97	4.31531			1895.97	3.81847
		1962.22	68.1092				1963.21	3.12639			3739.09	3.59538				1963.21	3.39953			1897	4.31525			1897	3.81853
		1963.28	68.1088				1964.27	3.12632			3741.11	3.59538				1964.27	3.39946			1898.03	4.3153			1898.03	3.81857
		1964.34	68.1088				1965.33	3.12629			3743.13	3.59536				1965.33	3.39926			1899.05	4.31529			1899.05	3.81851
		1965.4	68.1089				1966.39	3.1263			3745.16	3.59534				1966.39	3.39926			1900.08	4.31531			1900.08	3.81856
		1966.46	68.1088				1967.45	3.12634			3747.18	3.59536				1967.45	3.39922			1901.1	4.31532			1901.1	3.81851
		1967.52	68.1088				1968.51	3.12629			3749.2	3.59534				1968.51	3.39917			1902.13	4.31527			1902.13	3.81854
		1968.58	68.1086				1969.58	3.12631			3751.22	3.59534				1969.58	3.39912			1903.16	4.31526			1903.16	3.81845
		1969.64	68.1086				1970.64	3.12631			3753.25	3.59531				1970.64	3.39912			1904.18	4.31529			1904.18	3.81846
		1970.7	68.1084				1971.7	3.12629			3755.27	3.59532				1971.7	3.39893			1905.21	4.31526			1905.21	3.81843
		1971.84	68.1083				1972.76	3.12633			3757.29	3.59544				1972.76	3.39893			1906.23	4.31529			1906.23	3.81848
		1972.9	68.1083				1973.82	3.12634			3759.31	3.59528				1973.82	3.39888			1907.26	4.3153			1907.26	3.81846
		1973.97	68.1083				1974.88	3.12633			3761.34	3.59533				1974.88	3.39883			1908.29	4.31528			1908.29	3.81845
		1975.03	68.1082				1975.94	3.12637			3763.36	3.59527				1975.94	3.39871			1909.31	4.31522			1909.31	3.81846
		1976.09	68.1082				1977.01	3.12633			3765.38	3.59524				1977.01	3.39869			1910.34	4.31521			1910.34	3.81848
		1977.15	68.1081				1978.07	3.12631			3767.41	3.59515				1978.07	3.3986			1911.36	4.31522			1911.36	3.81846
		1978.21	68.108				1979.13	3.12632			3769.43	3.59518				1979.13	3.39852			1912.39	4.31525			1912.39	3.81838
		1979.27	68.1081				1980.19	3.12632			3771.45	3.59518				1980.19	3.39845			1913.42	4.31529			1913.42	3.8184
		1980.33	68.108				1981.25	3.12631			3773.47	3.59506				1981.25	3.39852			1914.44	4.31522			1914.44	3.81844
		1981.39	68.1081				1982.31	3.12633			3775.5	3.59506				1982.31	3.39843			1915.47	4.31525			1915.47	3.8184
		1982.45	68.1078				1983.38	3.12632			3777.52	3.59505				1983.38	3.39836			1916.49	4.31518			1916.49	3.81843
		1983.51	68.1078				1984.44	3.12628			3779.54	3.5949				1984.44	3.39828			1917.52	4.31523			1917.52	3.81841
		1984.58	68.1079				1985.5	3.12628			3781.57	3.59485				1985.5	3.39814			1918.55	4.31514			1918.55	3.81839
		1985.64	68.1076				1986.56	3.12629			3783.59	3.59487				1986.56	3.39819			1919.57	4.31519			1919.57	3.81828
		1986.7	68.1077				1987.62	3.12628			3785.61	3.59481				1987.62	3.39812			1920.6	4.31514			1920.6	3.81837
		1987.76	68.1076				1988.68	3.12628			3787.63	3.59472				1988.68	3.398			1921.62	4.31518			1921.62	3.81842
		1988.82	68.1075				1989.74	3.12627			3789.66	3.59472				1989.74	3.3979			1922.65	4.31514			1922.65	3.81838
		1989.88	68.1077				1990.8	3.12626			3791.68	3.59473				1990.8	3.39802			1923.68	4.31514			1923.68	3.81834
		1990.94	68.1075				1991.87	3.12622			3793.7	3.5947				1991.87	3.3979			1924.7	4.31515			1924.7	3.81843
		1992	68.1075				1992.94	3.12622			3795.72	3.59482				1992.94	3.39781			1925.73	4.31513			1925.73	3.81837
		1993.06	68.1072				1994	3.12628			3797.75	3.59486				1994	3.39774			1926.75	4.31515			1926.75	3.81831
		1994.12	68.1072				1995.06	3.12634			3799.77	3.59487				1995.06	3.39771			1927.78	4.31509			1927.78	3.81841
		1995.18	68.1071				1996.12	3.12626			3801.79	3.59476				1996.12	3.39769			1928.8	4.31511			1928.8	3.81836
		1996.28	68.107				1997.18	3.12628			3803.82	3.59466				1997.18	3.39759			1929.83	4.31515			1929.83	3.81837
		1997.34	68.1068				1998.25	3.12621			3805.84	3.59459				1998.25	3.39752			1930.86	4.31512			1930.86	3.8184
		1998.4	68.1069				1999.31	3.12624			3807.86	3.59473				1999.31	3.39745			1931.88	4.31509			1931.88	3.81854
		1999.46	68.1068				2000.37	3.12622			3809.88	3.59457				2000.37	3.39736			1932.91	4.31506			1932.91	3.8185
		2000.52	68.1067				2001.43	3.12619			3811.91	3.59467				2001.43	3.39738			1933.93	4.31509			1933.93	3.81854
		2001.58	68.107				2002.49	3.12621			3813.93	3.5947				2002.49	3.39731			1934.96	4.31511			1934.96	3.81849
		2002.64	68.1067				2003.55	3.12624			3815.95	3.59457				2003.55	3.39736			1935.99	4.3151			1935.99	3.8185
		2003.7	68.1067				2004.61	3.12622			3817.98	3.59459				2004.61	3.39728			1937.01	4.3151			1937.01	3.81853
		2004.76	68.1067				2005.68	3.12621			3820	3.59453				2005.68	3.39704			1938.04	4.31509			1938.04	3.81851
		2005.82	68.1067				2006.74	3.12624			3822.02	3.59459				2006.74	3.39707			1939.06	4.31506			1939.06	3.81849
		2006.88	68.1063				2007.8	3.12622			3824.04	3.59461				2007.8	3.397			1940.09	4.31507			1940.09	3.81845
		2007.94	68.1064				2008.86	3.12619			3826.07	3.59451				2008.86	3.397			1941.12	4.31504			1941.12	3.81845
		2009	68.1063				2009.92	3.12624			3828.09	3.59438				2009.92	3.3969			1942.14	4.31509			1942.14	3.81843
		2010.06	68.1065				2010.98	3.12619			3830.11	3.59442				2010.98	3.39695			1943.17	4.31512			1943.17	3.81844
		2011.12	68.1062				2012.04	3.12621			3832.13	3.59445				2012.04	3.39673			1944.19	4.31509			1944.19	3.8184
		2012.19	68.1063				2013.1	3.1262			3834.16	3.59438				2013.1	3.39673			1945.22	4.31514			1945.22	3.81845
		2013.25	68.1062				2014.17	3.12613			3836.18	3.59444				2014.17	3.39681			1946.25	4.31507			1946.25	3.81839
		2014.38	68.1062				2015.23	3.12617			3838.2	3.59436				2015.23	3.39671			1947.27	4.31503			1947.27	3.81838
		2015.44	68.1063				2016.29	3.12613			3840.23	3.59437				2016.29	3.39664			1948.3	4.31503			1948.3	3.81842
		2016.5	68.1062				2017.42	3.12613			3842.25	3.59439				2017.42	3.39661			1949.32	4.31496			1949.32	3.81846
		2017.56	68.1058				2018.48	3.1262			3844.27	3.59441				2018.48	3.39661			1950.35	4.31498			1950.35	3.8184
		2018.63	68.106				2019.54	3.12613			3846.29	3.59454				2019.54	3.39657			1951.38	4.3149			1951.38	3.81848
		2019.69	68.1058				2020.6	3.12611			3848.32	3.59444				2020.6	3.39647			1952.4	4.315			1952.4	3.81836
		2020.75	68.1057				2021.66	3.12613			3850.34	3.59446				2021.66	3.39642			1953.43	4.31498			1953.43	3.81848
		2021.81	68.1056				2022.72	3.12612			3852.36	3.59446				2022.72	3.3964			1954.45	4.31504			1954.45	3.8184
		2022.87	68.1056				2023.78	3.12616			3854.39	3.5944				2023.78	3.39631			1955.48	4.31501			1955.48	3.81837
		2023.93	68.1056				2024.84	3.12616			3856.41	3.59442				2024.84	3.39633			1956.51	4.31495			1956.51	3.81833
		2024.99	68.1057				2025.91	3.12616			3858.43	3.59418				2025.91	3.39623			1957.53	4.31498			1957.53	3.81834
		2026.05	68.1056				2026.97	3.1261			3860.45	3.59434				2026.97	3.39623			1958.56	4.31494			1958.56	3.81834
		2027.11	68.1054				2028.03	3.12615			3862.48	3.59422				2028.03	3.39609			1959.58	4.31499			1959.58	3.81835
		2028.17	68.1054				2029.09	3.12611			3864.5	3.59436				2029.09	3.39609			1960.61	4.31492			1960.61	3.81838
		2029.23	68.1053				2030.15	3.12619			3866.52	3.59421				2030.15	3.39597			1961.64	4.31488			1961.64	3.81832
		2030.29	68.1052				2031.21	3.12616			3868.54	3.5942				2031.21	3.39597			1962.66	4.31489			1962.66	3.81834
		2031.35	68.1052				2032.28	3.12615			3870.57	3.59424				2032.28	3.3959			1963.69	4.31489			1963.69	3.81838
		2032.41	68.1051				2033.34	3.12613			3872.59	3.59411				2033.34	3.39573			1964.71	4.31483			1964.71	3.81838
		2033.47	68.1049				2034.4	3.12607			3874.61	3.59413				2034.4	3.3959			1965.74	4.31494			1965.74	3.81831
		2034.53	68.1049				2035.46	3.1261			3876.64	3.59402				2035.46	3.39575			1966.77	4.31488			1966.77	3.81832
		2035.59	68.1051				2036.52	3.1261			3878.66	3.59399				2036.52	3.39568			1967.79	4.31489			1967.79	3.81836
		2036.65	68.1049				2037.58	3.12607			3880.68	3.59409				2037.58	3.39576			1968.82	4.31486			1968.82	3.81831
		2037.71	68.1048				2038.64	3.12607			3882.7	3.59391				2038.64	3.39559			1969.84	4.31486			1969.84	3.81833
		2038.78	68.1047				2039.7	3.12612			3884.73	3.59397				2039.7	3.39576			1970.87	4.31482			1970.87	3.81822
		2039.84	68.1046				2040.76	3.12611			3886.75	3.59391				2040.76	3.39576			1971.9	4.31481			1971.9	3.81829
		2040.98	68.1044				2041.89	3.12608			3888.77	3.5939				2041.89	3.39559			1972.92	4.31486			1972.92	3.81829
		2042.04	68.1044				2042.96	3.12605			3890.8	3.59376				2042.96	3.39549			1973.95	4.31484			1973.95	3.81829
		2043.1	68.1045				2044.02	3.12605			3892.82	3.59391				2044.02	3.39552			1974.97	4.31481			1974.97	3.81825
		2044.16	68.1045				2045.08	3.12601			3894.84	3.59393				2045.08	3.39542			1976	4.31475			1976	3.81824
		2045.22	68.1042				2046.14	3.12598			3896.86	3.5939				2046.14	3.39535			1977.03	4.31478			1977.03	3.81823
		2046.29	68.1043				2047.2	3.12605			3898.89	3.59382				2047.2	3.39535			1978.05	4.31478			1978.05	3.81824
		2047.34	68.1042				2048.26	3.12605			3900.91	3.59387				2048.26	3.3953			1979.08	4.3148			1979.08	3.81829
		2048.41	68.1042				2049.32	3.12601			3902.93	3.59379				2049.32	3.39526			1980.1	4.31479			1980.1	3.81823
		2049.46	68.1041				2050.38	3.12602			3904.95	3.59384				2050.38	3.39516			1981.13	4.31476			1981.13	3.8183
		2050.53	68.1038				2051.45	3.12603			3906.98	3.59378				2051.45	3.39518			1982.16	4.31476			1982.16	3.81829
		2051.59	68.1041				2052.51	3.12601			3909	3.59376				2052.51	3.39516			1983.18	4.31476			1983.18	3.81822
		2052.65	68.104				2053.57	3.126			3911.02	3.59376				2053.57	3.39506			1984.21	4.3148			1984.21	3.8182
		2053.7	68.104				2054.63	3.126			3913.05	3.59391				2054.63	3.39514			1985.23	4.31476			1985.23	3.81819
		2054.77	68.1038				2055.69	3.12607			3915.07	3.59376				2055.69	3.39502			1986.26	4.31476			1986.26	3.81819
		2055.83	68.1037				2056.75	3.12598			3917.09	3.59379				2056.75	3.39506			1987.29	4.31471			1987.29	3.81819
		2056.89	68.1038				2057.82	3.12595			3919.11	3.59371				2057.82	3.39492			1988.31	4.3147			1988.31	3.81817
		2057.95	68.1036				2058.88	3.12601			3921.14	3.59377				2058.88	3.39485			1989.34	4.31468			1989.34	3.81816
		2059.01	68.1036				2059.94	3.126			3923.16	3.59367				2059.94	3.39478			1990.36	4.31472			1990.36	3.8181
		2060.07	68.1034				2061	3.12598			3925.18	3.59366				2061	3.39473			1991.39	4.31467			1991.39	3.81816
		2061.15	68.1036				2062.06	3.12596			3927.21	3.59372				2062.06	3.39478			1992.42	4.31466			1992.42	3.81813
		2062.21	68.1033				2063.12	3.12592			3929.23	3.59362				2063.12	3.39473			1993.44	4.31466			1993.44	3.81816
		2063.28	68.1031				2064.19	3.12596			3931.25	3.59362				2064.19	3.39463			1994.47	4.3146			1994.47	3.81821
		2064.34	68.1032				2065.25	3.12596			3933.27	3.59363				2065.25	3.39461			1995.49	4.31471			1995.49	3.81816
		2065.4	68.1031				2066.31	3.12598			3935.3	3.59364				2066.31	3.39459			1996.52	4.31469			1996.52	3.81812
		2066.46	68.1031				2067.37	3.12597			3937.32	3.59365				2067.37	3.39444			1997.55	4.31465			1997.55	3.81814
		2067.52	68.1031				2068.43	3.12596			3939.34	3.59371				2068.43	3.39449			1998.57	4.31463			1998.57	3.81812
		2068.58	68.1031				2069.49	3.12592			3941.36	3.59379				2069.49	3.39449			1999.6	4.31459			1999.6	3.81813
		2069.64	68.1029				2070.63	3.12591			3943.39	3.59374				2070.63	3.39435			2000.62	4.31464			2000.62	3.8181
		2070.7	68.1029				2071.69	3.1259			3945.41	3.59364				2071.69	3.39442			2001.65	4.31463			2001.65	3.8183
		2071.76	68.1028				2072.75	3.12596			3947.43	3.59362				2072.75	3.39435			2002.68	4.3146			2002.68	3.81829
		2072.82	68.1027				2073.81	3.12596			3949.46	3.59372				2073.81	3.39442			2003.7	4.31461			2003.7	3.81822
		2073.88	68.1026				2074.87	3.12596			3951.48	3.59366				2074.87	3.39421			2004.73	4.3146			2004.73	3.81815
		2074.94	68.1028				2075.93	3.12595			3953.5	3.59364				2075.93	3.3942			2005.75	4.31458			2005.75	3.81821
		2076	68.1026				2076.99	3.12578			3955.52	3.59371				2076.99	3.39425			2006.78	4.31458			2006.78	3.81812
		2077.07	68.1024				2078.06	3.12592			3957.55	3.59355				2078.06	3.39418			2007.81	4.3146			2007.81	3.81817
		2078.13	68.1024				2079.12	3.12587			3959.57	3.59357				2079.12	3.39409			2008.83	4.31453			2008.83	3.81813
		2079.19	68.1024				2080.18	3.12574			3961.59	3.5936				2080.18	3.39411			2009.86	4.31457			2009.86	3.81816
		2080.25	68.1024				2081.24	3.12591			3963.62	3.59374				2081.24	3.39411			2010.88	4.31451			2010.88	3.81815
		2081.31	68.1023				2082.3	3.1259			3965.64	3.59363				2082.3	3.39404			2011.91	4.31454			2011.91	3.81816
		2082.37	68.1022				2083.36	3.12587			3967.66	3.59351				2083.36	3.39394			2012.94	4.31451			2012.94	3.81813
		2083.43	68.1021				2084.42	3.12592			3969.68	3.59361				2084.42	3.39387			2013.96	4.3145			2013.96	3.81817
		2084.49	68.102				2085.48	3.12587			3971.71	3.59359				2085.48	3.39394			2014.99	4.31448			2014.99	3.81817
		2085.55	68.102				2086.54	3.1259			3973.73	3.59364				2086.54	3.3938			2016.01	4.31445			2016.01	3.81813
		2086.61	68.102				2087.6	3.12591			3975.75	3.59362				2087.6	3.39371			2017.04	4.31445			2017.04	3.81817
		2087.67	68.102				2088.67	3.12591			3977.77	3.59367				2088.67	3.39373			2018.07	4.31452			2018.07	3.81814
		2088.73	68.1019				2089.73	3.12592			3979.8	3.59372				2089.73	3.39387			2019.09	4.31452			2019.09	3.81812
		2089.79	68.1018				2090.79	3.1259			3981.82	3.59361				2090.79	3.39375			2020.12	4.31447			2020.12	3.8181
		2090.85	68.1017				2091.85	3.12587			3983.84	3.59359				2091.85	3.3937			2021.14	4.31445			2021.14	3.81813
		2091.91	68.1018				2092.94	3.12584			3985.87	3.59369				2092.94	3.39358			2022.17	4.31444			2022.17	3.8181
		2092.97	68.1016				2094	3.12582			3987.89	3.59362				2094	3.3937			2023.2	4.31448			2023.2	3.81814
		2094.03	68.1016				2095.06	3.12586			3989.91	3.59369				2095.06	3.39363			2024.22	4.31441			2024.22	3.81821
		2095.09	68.1014				2096.12	3.12584			3991.93	3.59367				2096.12	3.39356			2025.25	4.31442			2025.25	3.81814
		2096.16	68.1013				2097.18	3.12579			3993.96	3.59373				2097.18	3.39356			2026.27	4.31444			2026.27	3.8181
		2097.22	68.1014				2098.24	3.12577			3995.98	3.5937				2098.24	3.39339			2027.3	4.31439			2027.3	3.81815
		2098.28	68.1012				2099.31	3.12586			3998	3.59384				2099.31	3.39344			2028.32	4.31438			2028.32	3.81806
		2099.34	68.1014				2100.37	3.12584			4000.03	3.59378				2100.37	3.39337			2029.35	4.31439			2029.35	3.81819
		2100.4	68.101				2101.43	3.12584			4002.05	3.59376				2101.43	3.39335			2030.38	4.31437			2030.38	3.81819
		2101.46	68.1011				2102.49	3.12582			4004.07	3.59386				2102.49	3.39335			2031.4	4.31433			2031.4	3.81824
		2102.55	68.1011				2103.55	3.12587			4006.09	3.59372				2103.55	3.39325			2032.43	4.31433			2032.43	3.81813
		2103.61	68.101				2104.61	3.12586			4008.12	3.59373				2104.61	3.3933			2033.45	4.31434			2033.45	3.81814
		2104.67	68.1008				2105.68	3.12579			4010.14	3.59372				2105.68	3.39325			2034.48	4.31433			2034.48	3.81816
		2105.73	68.1009				2106.74	3.12582			4012.16	3.59375				2106.74	3.39325			2035.51	4.31434			2035.51	3.81823
		2106.79	68.1007				2107.8	3.12585			4014.18	3.59373				2107.8	3.39301			2036.53	4.31432			2036.53	3.81811
		2107.85	68.1007				2108.86	3.12581			4016.21	3.59375				2108.86	3.39313			2037.56	4.31431			2037.56	3.81812
		2108.91	68.1008				2109.92	3.12579			4018.23	3.59374				2109.92	3.39304			2038.58	4.31434			2038.58	3.8181
		2109.97	68.1005				2110.98	3.1258			4020.25	3.59371				2110.98	3.39301			2039.61	4.31435			2039.61	3.81818
		2111.03	68.1005				2112.04	3.12581			4022.28	3.59368				2112.04	3.39301			2040.64	4.31428			2040.64	3.81817
		2112.09	68.1004				2113.11	3.12586			4024.3	3.59374				2113.11	3.39299			2041.66	4.31427			2041.66	3.81814
		2113.15	68.1005				2114.17	3.12577			4026.32	3.59382				2114.17	3.39291			2042.69	4.31425			2042.69	3.81814
		2114.21	68.1004				2115.23	3.12577			4028.34	3.59376				2115.23	3.39292			2043.71	4.31424			2043.71	3.81814
		2115.27	68.1002				2116.29	3.12582			4030.37	3.59374				2116.29	3.3928			2044.74	4.31422			2044.74	3.8181
		2116.33	68.1003				2117.35	3.12577			4032.39	3.5937				2117.35	3.39273			2045.77	4.31422			2045.77	3.81806
		2117.39	68.1003				2118.41	3.12575			4034.41	3.59369				2118.41	3.39271			2046.79	4.31425			2046.79	3.81809
		2118.45	68.1				2119.5	3.1257			4036.44	3.59369				2119.5	3.39263			2047.82	4.31415			2047.82	3.81806
		2119.51	68.1001				2120.56	3.12581			4038.46	3.59363				2120.56	3.39263			2048.84	4.31416			2048.84	3.81812
		2120.58	68.1001				2121.64	3.12577			4040.48	3.59359				2121.64	3.39263			2049.87	4.31421			2049.87	3.81805
		2121.64	68.1001				2122.7	3.12579			4042.5	3.59367				2122.7	3.39268			2050.9	4.31414			2050.9	3.81808
		2122.7	68.1				2123.76	3.1257			4044.53	3.59366				2123.76	3.39263			2051.92	4.31416			2051.92	3.81808
[truncated: 7,440 more rows]

## Sheet: Figure 3b&3c
	Pd	1,10-Decanedithiol grown on Pd	Au	1,10-Decanedithiol grown on Au
Binding Energy (E)	Counts / s	Counts / s	Counts / s	Counts / s
20	9241.66	14515.6	8189.47	Counts / s
19.95	9374.12	14642.2	8626.11	18122.8
19.9	9369.38	14456.4	8265.77	18548.3
19.85	9923.4	15349.4	8614.11	18487.2
19.8	9974.66	15510.9	8610.87	19279.1
19.75	9987.93	15193.9	8773.39	19650.4
19.7	10584.3	16040.6	9319.32	20250.2
19.65	10834.6	16841.4	9135.19	21556.3
19.6	10712.6	17122.9	9465.13	22457.1
19.55	11381.7	17575.7	9820.48	22904.9
19.5	11599.2	18408.8	10052.7	24386.6
19.45	12196	19036.9	9884.12	24843.8
19.4	12875.6	20060.6	10450.6	26020
19.35	13083.5	21262.9	10671.3	27108.6
19.3	13616.1	21725.2	11220.6	28347.3
19.25	14150.6	22871.8	11356.4	29937.2
19.2	14528.3	24278.5	11796.3	31524.1
19.15	15037	25441	12365.2	33450.2
19.1	16255.5	26786.2	13497.4	35318.1
19.05	17024	28302.5	14804	37742.6
19	17573	29618.7	15783.6	38813.9
18.95	18791.1	32117.6	17339.1	40505.3
18.9	19743.4	33706.5	18670.5	43288.7
18.85	20883	36138.8	19921.2	44968.3
18.8	22333.3	37881.9	21329.7	48088.9
18.75	22875.4	39976.6	22787	51954.9
18.7	24033.4	41995.4	24181.5	54372.8
18.65	25732.2	45673.4	25479.1	57063.1
18.6	27761.8	48163.5	26705.1	60307.9
18.55	29309.2	51508.9	28103	63190.5
18.5	31127.8	54343	29421.1	66295.5
18.45	33106.8	57746.5	31472	71029.1
18.4	35955.7	60621.8	32907.9	74158.2
18.35	39180	64840	34710.5	78227
18.3	42437.3	67909.2	35970	83040
18.25	46617.1	70725.5	37794.3	87591.3
18.2	51290.9	75509.1	39242.2	92536.1
18.15	57040.9	79229.8	41368.4	99518.3
18.1	63050	84077	43693	103486
18.05	70357.7	89372.7	46092.7	109493
18	78166.8	92944.8	48307.9	115996
17.95	85994.5	96224.5	50319.8	123774
17.9	95792	101192	52107.3	129717
17.85	106820	105771	53880.2	137498
17.8	114808	110016	55347.7	147160
17.75	125643	116283	57162.6	153415
17.7	136458	121994	59674.6	161944
17.65	144394	127495	61262.4	169391
17.6	153010	135733	63008.5	175848
17.55	161704	146742	64801.7	187084
17.5	171566	157985	67677.2	196026
17.45	184400	174229	70007.7	202635
17.4	196419	193621	71974.4	211424
17.35	205671	217898	74770	222289
17.3	223306	260227	77326.4	236422
17.25	239835	308970	80059	256740
17.2	258633	357674	82604.5	281015
17.15	290669	433059	85707.8	316788
17.1	318675	500538	88928.7	638609
17.05	349546	564116	91586.3	1742210
17	399956	652695	95994.7	3994570
16.95	438732	729033	100064	6526160
16.9	470564	828851	103182	7631380
16.85	508260	1183090	108664	8051010
16.8	534986	2203020	114256	8210180
16.75	555894	4237600	118741	8019210
16.7	585941	6505550	124520	7718950
16.65	620781	7408070	130488	7390280
16.6	726732	7547840	135304	7063860
16.55	1393500	7466500	146041	6739110
16.5	2625210	7272720	161562	6435800
16.45	3410080	7000030	268854	6154320
16.4	3893720	6744590	965505	5884010
16.35	4119350	6494410	2040160	5662120
16.3	4185060	6237120	2877830	5464050
16.25	4191890	6018000	3337750	5281310
16.2	4178350	5827380	3532560	5125570
16.15	4093930	5617160	3543650	4988190
16.1	4003070	5425240	3492890	4835400
16.05	3933700	5272710	3417650	4707210
16	3827020	5088170	3307650	4615650
15.95	3721950	4923370	3200310	4496840
15.9	3647860	4803600	3108060	4380720
15.85	3546590	4657660	2995140	4317290
15.8	3444420	4500690	2899320	4208120
15.75	3374260	4398930	2821900	4114680
15.7	3279800	4253550	2727430	4061720
15.65	3204770	4147330	2659130	3975490
15.6	3137920	4058630	2587340	3910930
15.55	3056340	3945470	2510690	3875220
15.5	2991180	3869810	2457900	3798730
15.45	2932970	3788610	2395610	3755780
15.4	2845800	3666800	2320980	3711200
15.35	2796450	3603770	2271400	3629520
15.3	2729820	3512420	2211900	3595850
15.25	2640520	3407620	2140270	3531040
15.2	2582830	3339820	2094310	3442080
15.15	2520570	3249390	2040730	3391370
15.1	2451050	3156650	1982730	3336440
15.05	2390990	3091930	1939050	3265550
15	2335740	3014590	1886690	3203830
14.95	2272730	2938840	1830190	3146300
14.9	2222100	2870500	1788130	3073040
14.85	2165870	2799410	1738380	3008490
14.8	2110750	2728650	1695470	2944620
14.75	2058270	2659790	1655060	2878430
14.7	2008860	2594690	1610940	2808450
14.65	1957490	2525490	1564740	2736760
14.6	1904850	2458750	1526150	2665490
14.55	1860390	2400700	1489720	2602800
14.5	1812590	2334020	1453100	2535620
14.45	1764540	2273680	1416970	2461930
14.4	1731940	2225340	1388760	2399400
14.35	1687540	2165790	1350430	2354090
14.3	1646340	2109000	1321090	2288730
14.25	1617510	2071650	1297680	2220330
14.2	1575080	2015320	1264550	2166590
14.15	1536300	1961800	1234660	2106330
14.1	1509740	1919140	1208610	2042170
14.05	1470130	1859710	1179000	1989310
14	1435800	1815380	1152270	1926470
13.95	1402110	1768600	1125460	1874770
13.9	1365150	1716590	1098210	1825550
13.85	1337710	1677560	1074360	1761980
13.8	1309480	1639800	1053400	1712300
13.75	1274020	1588540	1026850	1668660
13.7	1243580	1543650	1002330	1618390
13.65	1218500	1509290	985980	1572540
13.6	1197500	1481240	967242	1533490
13.55	1171850	1447540	953585	1491030
13.5	1155100	1420440	938072	1458870
13.45	1130280	1381560	911308	1420500
13.4	1104930	1351260	897068	1376650
13.35	1081590	1322980	874656	1342160
13.3	1062090	1287640	855557	1305150
13.25	1041880	1253070	836543	1273420
13.2	1024080	1227520	823027	1239510
13.15	1005310	1207980	807477	1208640
13.1	987707	1175610	793043	1183910
13.05	974872	1155270	786208	1153620
13	956839	1132810	771996	1127170
12.95	935766	1099500	755677	1104330
12.9	918704	1074820	741894	1075610
12.85	908800	1053740	730395	1047940
12.8	888853	1024660	716323	1026450
12.75	883176	1012620	713892	1000050
12.7	880213	1004050	707170	987733
12.65	844979	959695	679898	981435
12.6	851774	960065	684432	933946
12.55	833067	935295	670393	936095
12.5	799843	900237	648734	913848
12.45	791092	885961	641656	880346
12.4	779317	872125	631127	865480
12.35	764534	850348	621338	853448
12.3	755892	839486	613158	834891
12.25	743768	825406	604112	826162
12.2	725699	809808	591539	816508
12.15	721360	806566	586100	802887
12.1	713177	793469	576980	799751
12.05	699749	775997	567498	789871
12	688328	766220	557823	779070
11.95	681827	758855	549392	774367
11.9	668995	748474	539665	770208
11.85	661242	745201	532326	760642
11.8	652574	735908	523612	761641
11.75	644683	729957	518482	760594
11.7	636964	723882	511539	757609
11.65	629373	718512	505096	758363
11.6	619205	712250	493198	755634
11.55	613477	713921	485070	753265
11.5	606980	708004	479602	757244
11.45	599042	703583	471917	755824
11.4	594649	702726	467321	755330
11.35	589769	701291	462131	760291
11.3	582655	698787	456584	760129
11.25	581868	697916	452944	763016
11.2	576401	699010	447794	762910
11.15	573719	701374	444111	765610
11.1	565891	696847	435366	770854
11.05	566760	699537	433836	766341
11	565058	697009	429130	770273
10.95	558352	693622	425501	767958
10.9	558477	697902	424965	765416
10.85	554486	690246	421165	769206
10.8	551791	685628	415499	767956
10.75	554452	689332	417074	759596
10.7	548433	683794	412912	762458
10.65	547015	680099	409482	759441
10.6	548780	681631	411423	755913
10.55	543925	674243	409032	756890
10.5	539432	671689	407469	749905
10.45	541297	671372	408039	745336
10.4	535697	665561	405415	745358
10.35	530441	658879	401857	736229
10.3	531159	659680	402966	731362
10.25	527065	653480	402494	732976
10.2	525309	650445	402790	724463
10.15	526859	648756	403674	720509
10.1	525830	647144	401783	720791
10.05	521990	641016	399105	719714
10	519702	638081	400958	715182
9.95	517531	637197	397811	711207
9.9	515176	631052	396421	707246
9.85	514118	630901	394662	705044
9.8	509394	627313	394691	704661
9.75	507878	625442	393315	704967
9.7	507364	624617	393815	703044
9.65	505723	622666	392593	699567
9.6	504360	619272	389144	694515
9.55	504371	617387	389495	690454
9.5	503448	616853	391322	690285
9.45	499670	613430	389533	690718
9.4	502210	615295	391436	690929
9.35	499520	613323	390439	694783
9.3	495652	606575	388445	690640
9.25	498734	607971	390033	684680
9.2	495652	602613	387985	688098
9.15	490529	594578	384737	684235
9.1	490350	595842	388616	678335
9.05	488840	596095	387269	683603
9	486275	588976	384219	684148
8.95	488380	591795	386748	677400
8.9	482576	588285	383807	682238
8.85	478366	582594	384028	677484
8.8	481802	588884	390298	674286
8.75	477947	586100	387347	675246
8.7	476677	578477	385763	674207
8.65	476492	578202	385729	672343
8.6	471229	572763	382871	677282
8.55	467093	573266	381225	671596
8.5	467303	575244	383725	667012
8.45	464024	567963	382759	667972
8.4	462834	564712	380143	664391
8.35	462299	565392	379528	661731
8.3	459487	563157	379304	667478
8.25	456164	562454	378569	665975
8.2	455784	560791	379047	664046
8.15	452914	557017	377831	660959
8.1	448780	553170	375213	658840
8.05	444836	549718	374475	656944
8	442548	544465	372178	653753
7.95	438543	538997	370477	651060
7.9	438427	539318	372047	648324
7.85	436422	537040	372064	649517
7.8	432164	533956	370802	649245
7.75	432319	535283	372196	644118
7.7	431993	535054	373658	645566
7.65	426708	530517	370457	645338
7.6	428953	531015	373160	641463
7.55	429356	530250	377075	642884
7.5	423603	523427	374978	642831
7.45	424717	523882	375512	636083
7.4	425497	522189	379025	641021
7.35	417411	518453	376771	641455
7.3	417138	518057	376906	633442
7.25	417546	514513	379089	631316
7.2	412747	511265	376262	632187
7.15	412424	510148	377845	625833
7.1	409676	509749	378314	625436
7.05	405721	502452	375701	622956
7	406102	505109	378758	614060
6.95	401811	500980	376630	616905
6.9	396230	494587	375347	611534
6.85	396462	496482	380759	604739
6.8	392455	491157	381578	604594
6.75	387843	485001	380392	598498
6.7	386716	486600	384059	589791
6.65	381538	480500	386417	588563
6.6	377173	474558	389201	582884
6.55	377632	473380	393648	575369
6.5	373841	470748	397556	568615
6.45	369494	463946	402470	561398
6.4	366529	461333	411930	555481
6.35	364296	454874	416835	547581
6.3	361118	448922	417819	538922
6.25	355676	444217	414192	531196
6.2	353614	441779	406152	523209
6.15	349899	436338	393901	514923
6.1	344427	428068	383905	504857
6.05	341644	424284	373029	493633
6	338510	417583	364918	485120
5.95	331834	408736	354177	474688
5.9	329631	403899	347626	463187
5.85	325798	395973	340367	453091
5.8	321344	389927	332731	444910
5.75	315466	385793	329315	435714
5.7	311141	371805	321509	427539
5.65	306677	364092	316337	414574
5.6	302102	356587	312803	404073
5.55	295974	344544	305688	394057
5.5	292877	337532	302984	380087
5.45	290514	331467	301756	370131
5.4	283044	321474	296840	358130
5.35	276556	311417	294460	343009
5.3	272631	302253	293514	332718
5.25	266898	291903	292349	318041
5.2	262296	282137	289445	305581
5.15	258957	272925	289854	290695
5.1	253908	260121	288529	276760
5.05	248588	250098	287447	263180
5	242748	240427	283961	247972
4.95	237990	227451	280547	233111
4.9	233157	217004	281175	219536
4.85	228165	206946	282421	204955
4.8	221934	195772	283382	191138
4.75	219334	185421	286238	176499
4.7	214854	174638	289776	161457
4.65	209973	163429	287996	145897
4.6	204119	153416	284564	132719
4.55	199970	142569	278106	118358
4.5	194170	133631	269149	105961
4.45	186027	125249	261790	95364.9
4.4	181633	116292	255307	85298.5
4.35	175912	108434	245302	76267.8
4.3	170327	101885	238934	68354.7
4.25	165531	95883.2	232196	62369.2
4.2	159866	90843.9	223520	57772.4
4.15	156265	84935.7	218884	55541.2
4.1	150934	81698.6	213281	54518
4.05	143922	78138.1	202687	53239.1
4	140846	74922.9	196980	52798.3
3.95	137418	72761.9	190197	53761.5
3.9	133569	70843.1	181449	55303.1
3.85	129908	69596.4	174938	57127.2
3.8	125867	68077.9	168674	59070.1
3.75	122391	66993	162856	60823.4
3.7	119651	66460.6	157566	62643.8
3.65	117919	64826.9	154388	64956.6
3.6	115500	65254.6	148670	66600.3
3.55	112238	64449.3	145094	66590.1
3.5	111058	62566.9	141267	68401.6
3.45	107973	60972.2	136250	69422.9
3.4	105287	60911.3	134641	67335.7
3.35	104067	60338.1	131696	65228.2
3.3	99612.9	58487.9	127971	63609.6
3.25	96841.8	56959.7	125433	60628.7
3.2	94682.7	52826.1	123334	58164.5
3.15	90088.8	50427.1	120894	54067.2
3.1	86949	48333	117220	49905.4
3.05	83654.1	46137	115235	46293.4
3	80993.6	42985.3	113103	41553.8
2.95	77851.9	39642.1	111553	37507.8
2.9	75335	36425.9	111225	33079.1
2.85	72620.4	33915.8	109333	28821.8
2.8	69833.6	30669	106689	25053
2.75	66796.7	27740.5	102267	21304.7
2.7	65547.2	25787	96558.1	17500.8
2.65	62164.6	22991.6	90062.2	14761.8
2.6	60508.7	20866.5	81575.3	12265.3
2.55	59176.4	18913.5	73931.4	10157.6
2.5	57103.3	17497.6	67887.6	8344.47
2.45	55131.1	16306.7	61785.2	7121.79
2.4	54669.2	14911.2	57107.1	5901.94
2.35	53119	14186.8	53350.9	5046.52
2.3	51813.4	12694.2	50387.1	4386.36
2.25	50563.2	12200	46863.4	3883.59
2.2	48813.9	11934.7	44379.5	3496.88
2.15	47344.8	11116.6	42844.3	3143.33
2.1	45204.5	10638.3	40838.8	2844.48
2.05	43532.2	10417	38520.3	2748.78
2	43073.4	9649.4	36779	2521.41
1.95	42192.7	9218.23	36116.1	2600.88
1.9	40570.6	9093.15	34257.6	2547.4
1.85	39100.8	8735.41	32264.2	2545.8
1.8	38216	8245.79	31469.5	2463.43
1.75	37030	7745.51	29779.9	2354.09
1.7	35778.9	7543.76	29107.1	2315.23
1.65	34266.5	7303.9	28157.8	2203.92
1.6	33291.3	7111.51	26532.7	2165.8
1.55	32143.3	6678.25	25856.2	1991.39
1.5	31700.4	6301	24746.9	2115.63
1.45	30405.8	6215.1	24423.8	2066.01
1.4	29213.1	5780.95	23570.7	2013.53
1.35	28315.1	5698.45	22264.4	1809.27
1.3	27426.1	5440.77	21375.4	1736.7
1.25	26224.1	5129.09	20386.9	1678.68
1.2	25689.9	5068.49	19472.7	1549.05
1.15	25249.5	4940.12	18588.5	1362.48
1.1	23905.2	4665.08	17691	1175.05
1.05	23309.8	4457.27	16414.2	1109.85
1	22441.5	4324.38	15628.9	1046.17
0.95	21668.1	4102.82	15228.4	1001.35
0.9	20911.5	3883.94	14577.8	842.298
0.85	20408.4	3797.06	14185.9	762.47
0.8	19819	3573.99	13527.4	693.932
0.75	19504.3	3563.93	12542.6	672.616
0.7	19038.1	3403.43	11641.3	626.258
0.65	18091.1	3130.87	11410.3	637.707
0.6	17752.7	2930.86	11281.7	625.577
0.55	17055.2	2891.87	10305.6	505.499
0.5	16283.8	2773	9958.77	445.509
0.45	15802.1	2652.03	9534.19	432.636
0.4	15088.1	2341.95	9393.32	367.143
0.35	14462.5	2191.31	8618.07	299.067
0.3	13495.7	2094.03	8082.25	249.229
0.25	11773.3	1827.79	7362.4	280.423
0.2	9519.71	1457.03	6502.35	233.743
0.15	6060.51	864.729	4144.61	175.414
0.1	3405.94	555.333	2657.99	135.799
0.05	2009.55	309.903	1755.26	107.204
0	1512.69	238.967	1188.8	83.8155
-0.05	1521.87	220.153	1216.92	40.2601
-0.1	1343.32	262.533	1152.56	44.6959
-0.15	1206.34	218.682	1017.89	35.2771
-0.2	1258.36	184.825	946.156	26.6447
-0.25	1286.65	221.553	964.873	29.5798
-0.3	1168.87	184.909	921.272	43.6425
-0.35	1216.95	132.362	819.659	23.6945
-0.4	1184.03	177.321	757.935	14.913
-0.45	1140.93	181.131	699.33	12.6271
-0.5	1111.81	139.268	649.879	21.1255
-0.55	1029.73	174.633	696.031	49.4878
-0.6	1034.94	174.406	656.121	28.7325
-0.65	1013.91	155.915	607.88	12.2309
-0.7	925.968	96.9798	561.116	25.8754
-0.75	846.838	123.913	519.931	28.5864
-0.8	838.052	120.444	498.471	19.5128
-0.85	1020.79	110.424	451.361	38.1343
-0.9	970.772	114.285	398.676	14.905
-0.95	854.213	120.242	459.72	13.1393
-1	838.562	105.278	457.652	15.3051
-1.05	816.946	103.347	463.47	8.88655
-1.1	793.826	115.998	441.536	16.6667
-1.15	701.539	98.7065	427.565	11.0284
-1.2	674.834	91.5416	388.324	13.8265
-1.25	710.841	74.6809	362.738	23.0852
-1.3	709.054	63.9466	346.317	13.4074
-1.35	719.507	65.9704	334.061	6.20848
-1.4	641.388	67.6821	300.327	16.6146
-1.45	560.752	50.9404	295.742	8.81853
-1.5	524.845	63.4414	278.276	2.57503
-1.55	501.763	66.6387	263.472	11.9188
-1.6	500.561	65.7343	274.752	2.07983
-1.65	319.541	29.2387	216.137	4.93998
-1.7	232.771	27.2379	186.262	7.98619
-1.75	170.951	23.2943	99.0356	0.512205
-1.8	133.481	11.9988	50.9674	0
-1.85	107.454	20.6363	71.4356	0
-1.9	89.8429	13.3844	92.506	3.88455
-1.95	102.357	7.76911	58.3784	6.5076
-2	58.4714	15.4562	52.0778	4.61385
-2.05	58.9016	15.4552	52.492	1.56763
-2.1	103.646	13.2953	51.8407	3.43437
-2.15	102.126	8.04822	31.8107	0
-2.2	77.542	5.55922	27.8031	3.55042
-2.25	59.2797	11.4026	36.1084	2.95718
-2.3	48.1182	8.04822	39.1397	3.4964
-2.35	50.6132	9.27471	35.9134	0
-2.4	35.085	11.7267	42.8221	0
-2.45	20.4422	4.0086	13.6595	0
-2.5	26.1825	1.06943	8.88655	3.0112
-2.55	4.76491	12.3069	11.2995	6.9928
-2.6	6.86875	1.62965	8.32033	3.88455
-2.65	6.18747	3.55042	21.2615	5.002
-2.7	12.3689	1.45158	13.2403	1.11745
-2.75	9.01461	5.05602	4.39676	0
-2.8	11.9328	6.45358	2.62305	5.05602
-2.85	4.06263	5.06403	11.5366	8.4984
-2.9	5.002	3.43437	3.46939	5.33613
-2.95	5.33613	0	3.4964	1.11745
-3	1.11745	0	0	0
-3.05	0	13.4694	1.5056	1.5056
-3.1	1.56763	1.53661	3.4964	7.38095
-3.15	3.43437	0	4.4898	5.002
-3.2	0	0	5.002	9.15766
-3.25	0	0	2.07983	1.96379
-3.3	1.56763	1.56763	3.43437	0
-3.35	3.43437	3.43437	0	4.4898
-3.4	4.4898	0	3.88455	0.512205
-3.45	0.512205	0	5.60724	0
-3.5	3.88455	0	4.06263	0
-3.55	4.66787	0	1.45158	0
-3.6	1.45158	4.4898	0	1.56763
-3.65	0	0.512205	0	3.43437
-3.7	3.55042	0	0	0
-3.75	1.45158	5.9954	0	0
-3.8	8.97959	4.0086	1.5056	1.5056
-3.85	1.02441	0	7.04682	11.5366
-3.9	0	1.5056	5.94138	1.96379
-3.95	0	3.4964	4.39676	3.88455
-4	0	0	1.11745	1.11745
-4.05	3.88455	3.55042	0	4.4898
-4.1	1.11745	5.94138	0	0.512205
-4.15	0	0.512205	0	0
-4.2	0	4.4898	4.4898	0
-4.25	0	5.002	0.512205	1.5056
-4.3	0	0.512205	0	3.4964
-4.35	0	0	0	0
-4.4	0	5.45218	0	0
-4.45	0	4.55182	0	0
-4.5	0	1.5056	0	0
-4.55	4.4898	8.94858	0	0
-4.6	0.512205	4.55182	3.88455	0
-4.65	0	3.88455	1.11745	0
-4.7	0	1.11745	0	1.5056
-4.75	0	0	1.5056	9.55382
-4.8	0	0	3.4964	12.9262
-4.85	0	0	0	1.02441
-4.9	0	0	5.11805	3.88455
-4.95	3.55042	0	6.39156	5.002
-5	1.45158	1.06943	5.002	1.11745
				0

## Sheet: Figure 3e
	AV	AI				AV	AI
N2 background	0	5.57763e-07			1000ppm H2 backgroud	0	-5.82739e-06
	0.01	0.00288611				0.01	0.00294968
	0.02	0.00577124				0.02	0.00589253
	0.03	0.0086521				0.03	0.00883101
	0.04	0.0115345				0.04	0.0117707
	0.05	0.014416				0.05	0.01471
	0.06	0.0172975				0.06	0.0176474
	0.07	0.0201768				0.07	0.0205828
	0.08	0.0230586				0.08	0.0235199
	0.09	0.0259399				0.09	0.0264558
	0.1	0.0288214				0.1	0.0293897
	0.11	0.0317034				0.11	0.0323235
	0.12	0.0345933				0.12	0.0352646
	0.13	0.0374744				0.13	0.0381952
	0.14	0.0403575				0.14	0.0411274
	0.15	0.0432403				0.15	0.0440561
	0.16	0.0461235				0.16	0.0469841
	0.17	0.0490062				0.17	0.0499089
	0.18	0.0518877				0.18	0.052832
	0.19	0.0547703				0.19	0.0557541
	0.2	0.0576494				0.2	0.0586692
	0.21	0.0605304				0.21	0.061586
	0.22	0.0634124				0.22	0.064501
	0.23	0.066294				0.23	0.0674133
	0.24	0.0691739				0.24	0.07032
	0.25	0.072054				0.25	0.073226
	0.26	0.0749349				0.26	0.0761283
	0.27	0.0778137				0.27	0.0790254
	0.28	0.0807017				0.28	0.0819299
	0.29	0.0835791				0.29	0.0848215
	0.3	0.0864547				0.3	0.0877089

## Sheet: Figure 3f
	#Energy	tot						#Energy	tot							#Energy	tot							#Energy	tot						#Energy	tot
0	-17.586	0					0.01	-17.5929	0	1.25					0.02	-17.6325	0						0.05	-17.6289	0					0.1	-17.5768	0
	-17.534	0						-17.5409	0	1.25						-17.5805	0							-17.577	0						-17.5238	0
	-17.482	0						-17.4889	0	1.25						-17.5285	0							-17.5239	0						-17.4718	0
	-17.43	0						-17.4369	0	1.25						-17.4765	0							-17.4719	0						-17.4198	0
	-17.378	0						-17.3849	0	1.25						-17.4245	0							-17.42	0						-17.3668	0
	-17.326	0						-17.3329	0	1.25						-17.3715	0							-17.368	0						-17.3148	0
	-17.274	0						-17.2799	0	1.25						-17.3195	0							-17.316	0						-17.2628	0
	-17.222	0						-17.2279	0	1.25						-17.2675	0							-17.263	0						-17.2098	0
	-17.17	0						-17.1759	0	1.25						-17.2155	0							-17.211	0						-17.1578	0
	-17.118	0						-17.1239	0	1.25						-17.1635	0							-17.159	0						-17.1058	0
	-17.066	0						-17.0719	0	1.25						-17.1105	0							-17.107	0						-17.0528	0
	-17.014	0						-17.0199	0	1.25						-17.0585	0							-17.054	0						-17.0008	0
	-16.962	0						-16.9679	0	1.25						-17.0065	0							-17.002	0						-16.9488	0
	-16.91	0						-16.9159	0	1.25						-16.9545	0							-16.95	0						-16.8958	0
	-16.858	0						-16.8639	0	1.25						-16.9025	0							-16.898	0						-16.8438	0
	-16.806	0						-16.8119	0	1.25						-16.8505	0							-16.845	0						-16.7918	0
	-16.754	0						-16.7599	0	1.25						-16.7975	0							-16.793	0						-16.7388	0
	-16.702	0						-16.7069	0	1.25						-16.7455	0							-16.741	0						-16.6868	0
	-16.65	0						-16.6549	0	1.25						-16.6935	0							-16.6889	0						-16.6348	0
	-16.598	0						-16.6029	0	1.25						-16.6415	0							-16.6369	0						-16.5818	0
	-16.545	0.00042						-16.5509	0.00043	1.25043						-16.5895	0.00038							-16.584	0.00038						-16.5298	0.00037
	-16.493	0.07373						-16.4989	0.07607	1.32607						-16.5365	0.07012							-16.5319	0.07017						-16.4778	0.07014
	-16.441	1.78365						-16.4469	1.81749	3.06749						-16.4845	1.7469							-16.4799	1.75047						-16.4248	1.75451
	-16.389	6.50793						-16.3949	6.53134	7.78134						-16.4325	6.49611							-16.4279	6.49654						-16.3728	6.48979
	-16.337	3.86027						-16.3429	3.80271	5.05271						-16.3805	3.89155							-16.3749	3.87402						-16.3208	3.83513
	-16.285	0.35994						-16.2909	0.34653	1.59653						-16.3285	0.36329							-16.3229	0.3587						-16.2678	0.34976
	-16.233	0.00476						-16.2389	0.00445	1.25445						-16.2765	0.00476							-16.2709	0.00465						-16.2158	0.00443
	-16.181	1e-05						-16.1869	1e-05	1.25001						-16.2235	1e-05							-16.2189	1e-05						-16.1638	1e-05
	-16.129	0						-16.1339	0	1.25						-16.1715	3e-05							-16.1659	6e-05						-16.1108	1e-05
	-16.077	0.00015						-16.0819	0.0018	1.2518						-16.1195	0.01217							-16.1139	0.01926						-16.0588	0.00642
	-16.025	0.03695						-16.0299	0.19402	1.44402						-16.0675	0.64248							-16.0619	0.84466						-16.0068	0.4388
	-15.973	1.21646						-15.9779	2.90552	4.15552						-16.0155	4.85716							-16.0099	5.34289						-15.9538	4.19564
	-15.921	5.94287						-15.9259	6.70785	7.95785						-15.9635	5.80488							-15.958	5.35942						-15.9018	6.22813
	-15.869	4.69162						-15.8739	2.51523	3.76523						-15.9105	1.10982							-15.9049	0.85271						-15.8498	1.4735
	-15.817	0.58944						-15.8219	0.14428	1.39428						-15.8585	0.03105							-15.8529	0.01957						-15.7968	0.05116
	-15.765	0.01068						-15.7699	0.00114	1.25114						-15.8065	0.00012							-15.801	6e-05						-15.7448	0.00024
	-15.713	0.0001						-15.7179	0.0003	1.2503						-15.7545	0.00058							-15.749	0.00094						-15.6928	0.0027
	-15.661	0.02295						-15.6659	0.05968	1.30968						-15.7025	0.09313							-15.6959	0.12904						-15.6408	0.25617
	-15.609	0.93001						-15.6139	1.59501	2.84501						-15.6495	2.02801							-15.644	2.39979						-15.5878	3.34233
	-15.557	5.52947						-15.5609	6.37491	7.62491						-15.5975	6.64075							-15.592	6.74604						-15.5358	6.67353
	-15.505	5.28417						-15.5089	4.12066	5.37066						-15.5455	3.50924							-15.5399	3.05528						-15.4838	2.13311
	-15.453	0.80937						-15.4569	0.41881	1.66881						-15.4935	0.28719							-15.487	0.2119						-15.4308	0.1018
	-15.401	0.01809						-15.4049	0.00604	1.25604						-15.4415	0.00328							-15.435	0.00202						-15.3788	0.00065
	-15.349	5e-05						-15.3529	1e-05	1.25001						-15.3895	0							-15.3829	0						-15.3268	0
	-15.297	0						-15.3009	0	1.25						-15.3365	0							-15.3309	0						-15.2738	0
	-15.245	0						-15.2489	0	1.25						-15.2845	0							-15.279	0						-15.2218	0
	-15.193	0						-15.1969	0	1.25						-15.2325	0							-15.2259	0						-15.1698	0
	-15.141	0						-15.1449	1e-05	1.25001						-15.1805	2e-05							-15.1739	4e-05						-15.1168	7e-05
	-15.089	0.00117						-15.0929	0.00497	1.25497						-15.1285	0.00763							-15.122	0.01608						-15.0648	0.02157
	-15.037	0.14689						-15.0409	0.37229	1.62229						-15.0755	0.48741							-15.07	0.76532						-15.0128	0.91237
	-14.985	2.55546						-14.9879	3.94092	5.19092						-15.0235	4.4152							-15.0169	5.22845						-14.9598	5.54098
	-14.933	6.82576						-14.9359	6.53828	7.78828						-14.9715	6.27773							-14.9649	5.65031						-14.9078	5.31402
	-14.88	2.97137						-14.8839	1.75645	3.00645						-14.9195	1.43376							-14.913	0.97102						-14.8558	0.80252
	-14.828	0.2002						-14.8319	0.07085	1.32085						-14.8675	0.04842							-14.861	0.02418						-14.8028	0.01732
	-14.776	0.00188						-14.7799	0.00039	1.25039						-14.8155	0.00022							-14.8089	8e-05						-14.7508	5e-05
	-14.724	0						-14.7279	0	1.25						-14.7625	0							-14.756	0						-14.6988	0
	-14.672	0						-14.6759	0	1.25						-14.7105	0							-14.704	0						-14.6458	0
	-14.62	0						-14.6239	0	1.25						-14.6585	0							-14.6519	0						-14.5938	0
	-14.568	0						-14.5719	0	1.25						-14.6065	0							-14.5999	0						-14.5418	0
	-14.516	0						-14.5199	0	1.25						-14.5545	0							-14.547	0						-14.4888	0
	-14.464	0						-14.4679	0	1.25						-14.5025	0							-14.4949	0						-14.4368	0
	-14.412	0						-14.4159	0	1.25						-14.4495	0							-14.4429	0						-14.3848	2e-05
	-14.36	3e-05						-14.3629	0.00022	1.25022						-14.3975	0.00025							-14.391	0.00067						-14.3318	0.00856
	-14.308	0.01078						-14.3109	0.0486	1.2986						-14.3455	0.05299							-14.3379	0.10406						-14.2798	0.52869
	-14.256	0.59863						-14.2589	1.43689	2.68689						-14.2935	1.5126							-14.2859	2.16974						-14.2278	4.59259
	-14.204	4.79509						-14.2069	6.31689	7.56689						-14.2415	6.39665							-14.234	6.79624						-14.1748	6.21871
	-14.152	6.11148						-14.1549	4.48392	5.73392						-14.1885	4.34834							-14.182	3.4265						-14.1228	1.33944
	-14.1	1.2591						-14.1029	0.50245	1.75245						-14.1365	0.46324							-14.1299	0.26608						-14.0708	0.0421
	-14.048	0.03849						-14.0509	0.00804	1.25804						-14.0845	0.00698							-14.077	0.00286						-14.0178	0.00017
	-13.996	0.00016						-13.9989	2e-05	1.25002						-14.0325	1e-05							-14.025	0						-13.9658	0
	-13.944	0						-13.9469	0	1.25						-13.9805	0							-13.973	0						-13.9138	0
	-13.892	0						-13.8949	0	1.25						-13.9285	0							-13.9209	0						-13.8608	0
	-13.84	0						-13.8429	0	1.25						-13.8755	0							-13.868	0						-13.8088	0
	-13.788	0						-13.7899	0	1.25						-13.8235	0							-13.816	0						-13.7568	0
	-13.736	0						-13.7379	0	1.25						-13.7715	0							-13.7639	0						-13.7038	0
	-13.684	0						-13.6859	0	1.25						-13.7195	0							-13.7119	0						-13.6518	0
	-13.632	0						-13.6339	0	1.25						-13.6675	0							-13.659	0						-13.5998	0
	-13.58	0						-13.5819	0	1.25						-13.6145	0							-13.6069	0						-13.5468	0
	-13.528	0						-13.5299	0	1.25						-13.5625	0							-13.5549	0						-13.4948	3e-05
	-13.476	1e-05						-13.4779	3e-05	1.25003						-13.5105	1e-05							-13.503	0.00016						-13.4428	0.01182
	-13.424	0.00367						-13.4259	0.01358	1.26358						-13.4585	0.00652							-13.451	0.0396						-13.3898	0.64477
	-13.372	0.30876						-13.3739	0.69236	1.94236						-13.4065	0.44574							-13.3979	1.29511						-13.3378	4.9789
	-13.32	3.66388						-13.3219	5.09391	6.34391						-13.3545	4.30241							-13.346	6.2072						-13.2858	6.02066
	-13.268	6.8024						-13.2699	5.96111	7.21111						-13.3015	6.5002							-13.294	4.75541						-13.2338	1.15493
	-13.216	2.05553						-13.2169	1.12117	2.37117						-13.2495	1.57962							-13.2419	0.57209						-13.1808	0.0321
	-13.163	0.09424						-13.1649	0.03101	1.28101						-13.1975	0.05696							-13.189	0.00977						-13.1288	0.00012
	-13.111	0.00059						-13.1129	0.00011	1.25011						-13.1455	0.00027							-13.137	2e-05						-13.0768	0
	-13.059	0						-13.0609	0	1.25						-13.0935	0							-13.0849	0						-13.0238	0
	-13.007	0						-13.0089	0	1.25						-13.0415	0							-13.0329	0						-12.9718	0
	-12.955	0						-12.9569	0	1.25						-12.9885	0							-12.98	0						-12.9198	0
	-12.903	0						-12.9049	0	1.25						-12.9365	0							-12.9279	0						-12.8668	0
	-12.851	0						-12.8529	0	1.25						-12.8845	0							-12.8759	0						-12.8148	0
	-12.799	0						-12.8009	0	1.25						-12.8325	0							-12.8239	0						-12.7628	0
	-12.747	0						-12.7489	0	1.25						-12.7805	0							-12.772	0						-12.7098	0
	-12.695	0						-12.6969	0	1.25						-12.7275	0							-12.7189	0						-12.6578	0
	-12.643	0						-12.6439	0	1.25						-12.6755	0							-12.6669	0						-12.6058	0
	-12.591	0						-12.5919	0	1.25						-12.6235	0							-12.615	0						-12.5528	0
	-12.539	0						-12.5399	0	1.25						-12.5715	0							-12.563	0						-12.5008	0
	-12.487	0						-12.4879	0	1.25						-12.5195	0							-12.5099	0						-12.4488	9e-05
	-12.435	1e-05						-12.4359	6e-05	1.25006						-12.4675	6e-05							-12.458	0.00024						-12.3958	0.02661
	-12.383	0.00356						-12.3839	0.02037	1.27037						-12.4145	0.01968							-12.406	0.05267						-12.3438	1.04087
	-12.331	0.30354						-12.3319	0.88205	2.13205						-12.3625	0.86781							-12.3539	1.52043						-12.2918	5.87235
	-12.279	3.64981						-12.2799	5.56118	6.81118						-12.3105	5.53375							-12.301	6.47661						-12.2388	5.24358
	-12.227	6.861						-12.2279	5.60651	6.85651						-12.2585	5.61124							-12.249	4.42176						-12.1868	0.73539
	-12.175	2.09948						-12.1759	0.90438	2.15438						-12.2065	0.9056							-12.1969	0.47167						-12.1348	0.01467
	-12.123	0.09753						-12.1239	0.02126	1.27126						-12.1535	0.02118							-12.1449	0.00709						-12.0818	4e-05
	-12.071	0.00062						-12.0709	7e-05	1.25007						-12.1015	7e-05							-12.093	1e-05						-12.0298	0
	-12.019	0						-12.0189	0	1.25						-12.0495	0							-12.0399	0						-11.9778	0
	-11.967	0						-11.9669	0	1.25						-11.9975	0							-11.9879	0						-11.9248	0
	-11.915	0						-11.9149	0	1.25						-11.9455	0							-11.936	0						-11.8728	0
	-11.863	0						-11.8629	0	1.25						-11.8935	0							-11.884	0						-11.8208	0
	-11.811	0						-11.8109	0	1.25						-11.8405	0							-11.8309	0						-11.7678	0
	-11.759	0						-11.7589	0	1.25						-11.7885	0							-11.779	0						-11.7158	0
	-11.707	0						-11.7069	0	1.25						-11.7365	0							-11.727	0						-11.6638	0
	-11.655	0						-11.6549	0	1.25						-11.6845	0							-11.675	0						-11.6108	0
	-11.603	0						-11.6029	0	1.25						-11.6325	0							-11.622	0						-11.5588	2e-05
	-11.551	0						-11.5509	0	1.25						-11.5795	0							-11.57	3e-05						-11.5068	0.00805
	-11.498	0.00014						-11.4979	0.00185	1.25185						-11.5275	0.00119							-11.518	0.01117						-11.4538	0.51527
	-11.446	0.03631						-11.4459	0.20164	1.45164						-11.4755	0.15225							-11.4659	0.62512						-11.4018	4.62788
	-11.394	1.23352						-11.3939	3.04492	4.29492						-11.4235	2.66141							-11.4139	4.97711						-11.3498	6.47045
	-11.342	6.2057						-11.3419	7.0854	8.3354						-11.3715	7.07767							-11.361	6.2331						-11.2968	1.44009
	-11.29	5.04175						-11.2899	2.67826	3.92826						-11.3195	3.04162							-11.3089	1.24659						-11.2448	0.04686
	-11.238	0.65266						-11.2379	0.15493	1.40493						-11.2665	0.20027							-11.2569	0.03645						-11.1928	0.0002
	-11.186	0.01221						-11.1859	0.00123	1.25123						-11.2145	0.00182							-11.205	0.00014						-11.1398	0
	-11.134	3e-05						-11.1339	0	1.25						-11.1625	0							-11.1519	0						-11.0878	0
	-11.082	0						-11.0819	0	1.25						-11.1105	0							-11.0999	0						-11.0358	0
	-11.03	0						-11.0299	0	1.25						-11.0585	0							-11.048	0						-10.9838	0
	-10.978	0						-10.9779	0	1.25						-11.0065	0							-10.996	0						-10.9308	0
	-10.926	0						-10.9259	0	1.25						-10.9535	0							-10.9429	0						-10.8788	0
	-10.874	0						-10.8729	0	1.25						-10.9015	0							-10.891	0						-10.8268	0
	-10.822	0						-10.8209	0	1.25						-10.8495	0							-10.839	0						-10.7738	0
	-10.77	0						-10.7689	0	1.25						-10.7975	0							-10.7869	0						-10.7218	0
	-10.718	0						-10.7169	0	1.25						-10.7455	0							-10.7349	0						-10.6698	0.00273
	-10.666	0.00021						-10.6649	0.00125	1.25125						-10.6925	0.00057							-10.682	0.00193						-10.6168	0.2644
	-10.614	0.04809						-10.6129	0.15773	1.40773						-10.6405	0.09375							-10.6299	0.21065						-10.5648	3.51865
	-10.562	1.45739						-10.5609	2.73178	3.98178						-10.5885	2.10134							-10.5779	3.15671						-10.5128	7.15926
	-10.51	6.58152						-10.5089	7.24018	8.49018						-10.5365	7.07071							-10.5259	7.23135						-10.4598	2.33214
	-10.458	4.81253						-10.4569	3.11688	4.36688						-10.4845	3.83802							-10.473	2.66849						-10.4078	0.11356
	-10.406	0.5583						-10.4049	0.20679	1.45679						-10.4325	0.32312							-10.4209	0.14918						-10.3558	0.00074
	-10.354	0.0093						-10.3529	0.0019	1.2519						-10.3795	0.0038							-10.3689	0.00114						-10.3028	0
	-10.302	2e-05						-10.2999	0	1.25						-10.3275	1e-05							-10.317	0						-10.2508	0.0001
	-10.25	0						-10.2479	3e-05	1.25003						-10.2755	1e-05							-10.2639	0.00014						-10.1988	0.0287
	-10.198	0.00222						-10.1959	0.01087	1.26087						-10.2235	0.0065							-10.2119	0.0357						-10.1458	1.09954
	-10.146	0.22705						-10.1439	0.61349	1.86349						-10.1715	0.45024							-10.16	1.23895						-10.0938	6.08242
	-10.094	3.23783						-10.0919	4.97078	6.22078						-10.1185	4.40223							-10.108	6.28048						-10.0418	5.32819
	-10.042	7.16032						-10.0399	6.38296	7.63296						-10.0665	6.73374							-10.0559	5.08222						-9.98883	0.73256
	-9.98996	2.58035						-9.98789	1.3206	2.5706						-10.0145	1.65706							-10.003	0.64725						-9.93683	0.01732
	-9.93796	0.14255						-9.93589	0.04107	1.29107						-9.96249	0.06093							-9.95095	0.01412						-9.88483	0.28168
	-9.88596	0.02426						-9.88389	0.10474	1.35474						-9.91049	0.07123							-9.89895	0.24186						-9.83183	3.6772
	-9.83396	0.9901						-9.83189	2.27507	3.52507						-9.85849	1.84121							-9.84695	3.46563						-9.77983	8.72203
	-9.78096	6.96945						-9.77989	8.77289	10.0229						-9.80549	8.02921							-9.79395	9.38167						-9.72783	8.91899
	-9.72896	11.8202						-9.72689	10.442	11.692						-9.75349	10.3541							-9.74195	9.53401						-9.67483	4.58066
	-9.67696	6.23814						-9.67489	4.72882	5.97882						-9.70149	5.70639							-9.68995	3.79769						-9.62283	0.46689
	-9.62496	0.76776						-9.62289	0.46177	1.71177						-9.64949	0.73226							-9.63795	0.29528						-9.57083	0.00679
	-9.57296	0.01523						-9.57089	0.00675	1.25675						-9.59749	0.01431							-9.58595	0.00328						-9.51783	1e-05
	-9.52096	4e-05						-9.51889	1e-05	1.25001						-9.54549	4e-05							-9.53295	0						-9.46583	0
	-9.46896	0						-9.46689	0	1.25						-9.49249	0							-9.48095	0						-9.41383	0
	-9.41696	0						-9.41489	0	1.25						-9.44049	0							-9.42895	0						-9.36083	0
	-9.36496	0						-9.36289	0	1.25						-9.38849	0							-9.37695	0						-9.30883	0
	-9.31296	0						-9.31089	0	1.25						-9.33649	0							-9.32395	0						-9.25683	0
	-9.26096	0						-9.25889	0	1.25						-9.28449	0							-9.27195	0						-9.20383	0
	-9.20896	0						-9.20689	0	1.25						-9.23149	0							-9.21995	0						-9.15183	0
	-9.15696	0						-9.15389	0	1.25						-9.17949	0							-9.16795	0						-9.09983	0
	-9.10496	0						-9.10189	0	1.25						-9.12749	0							-9.11495	0						-9.04683	0
	-9.05296	0						-9.04989	0	1.25						-9.07549	0							-9.06295	0						-8.99483	0
	-9.00096	0						-8.99789	0	1.25						-9.02349	0							-9.01095	0						-8.94283	0
	-8.94896	0						-8.94589	0	1.25						-8.97149	0							-8.95895	0						-8.88983	0
	-8.89696	0						-8.89389	0	1.25						-8.91849	0							-8.90695	0						-8.83783	0
	-8.84496	0						-8.84189	0	1.25						-8.86649	0							-8.85395	0						-8.78583	0
	-8.79296	0						-8.78989	0	1.25						-8.81449	0							-8.80195	0						-8.73283	0
	-8.74096	0						-8.73789	0	1.25						-8.76249	0							-8.74995	0						-8.68083	0
	-8.68896	0						-8.68589	0	1.25						-8.71049	0							-8.69795	0						-8.62883	0
	-8.63696	0						-8.63389	0	1.25						-8.65749	0							-8.64495	0						-8.57683	0
	-8.58496	0						-8.58089	0	1.25						-8.60549	0							-8.59295	0						-8.52383	0
	-8.53296	0						-8.52889	0	1.25						-8.55349	0							-8.54095	0						-8.47183	0
	-8.48096	0						-8.47689	0	1.25						-8.50149	0							-8.48895	0						-8.41983	0
	-8.42896	0						-8.42489	0	1.25						-8.44949	0							-8.43595	0						-8.36683	0
	-8.37696	0						-8.37289	0	1.25						-8.39749	0							-8.38395	0						-8.31483	0
	-8.32496	0						-8.32089	0	1.25						-8.34449	0							-8.33195	0						-8.26283	0
	-8.27296	0						-8.26889	0	1.25						-8.29249	0							-8.27995	0						-8.20983	0
	-8.22096	0						-8.21689	0	1.25						-8.24049	0							-8.22795	0						-8.15783	0
	-8.16896	0						-8.16489	0	1.25						-8.18849	0							-8.17495	0						-8.10583	0
	-8.11596	0						-8.11289	0	1.25						-8.13649	0							-8.12295	0						-8.05283	0
	-8.06396	0						-8.06089	0	1.25						-8.08449	0							-8.07095	0						-8.00083	3e-05
	-8.01196	2e-05						-8.00889	3e-05	1.25003						-8.03149	3e-05							-8.01895	0.00015						-7.94883	0.01107
	-7.95996	0.00716						-7.95589	0.01291	1.26291						-7.97949	0.01153							-7.96595	0.03599						-7.89583	0.58586
	-7.90796	0.44502						-7.90389	0.63641	1.88641						-7.92749	0.59762							-7.91395	1.1559						-7.84383	4.42958
	-7.85596	3.97728						-7.85189	4.55773	5.80773						-7.87549	4.45536							-7.86195	5.48166						-7.79183	5.34644
	-7.80396	5.66609						-7.79989	5.25205	6.50205						-7.82349	5.31804							-7.80995	4.25607						-7.73883	1.07361
	-7.75196	1.32653						-7.74789	0.99616	2.24616						-7.77049	1.06046							-7.75695	0.57013						-7.68683	0.03724
	-7.69996	0.04803						-7.69589	0.02978	1.27978						-7.71849	0.03719							-7.70495	0.02615						-7.63483	0.15701
	-7.64796	0.00385						-7.64389	0.04848	1.29848						-7.66649	0.12494							-7.65295	0.52713						-7.58183	2.16735
	-7.59596	0.2777						-7.59189	1.26069	2.51069						-7.61449	2.10581							-7.60095	3.79643						-7.52983	5.11566
	-7.54396	3.1154						-7.53989	5.17728	6.42728						-7.56249	5.67893							-7.54895	4.85666						-7.47783	2.48845
	-7.49196	5.64747						-7.48789	3.70182	4.95182						-7.51049	2.63933							-7.49595	1.21586						-7.42483	0.28486
	-7.43996	1.73743						-7.43589	0.48991	1.73991						-7.45749	0.23311							-7.44395	0.09757						-7.37283	0.23813
	-7.38796	0.24102						-7.38289	0.2989	1.5489						-7.40549	0.29288							-7.39195	0.38731						-7.32083	0.76736
	-7.33596	0.55215						-7.33089	0.70737	1.95737						-7.35349	0.72234							-7.33995	0.86252						-7.26783	0.90175
	-7.28396	0.64864						-7.27889	0.67019	1.92019						-7.30149	0.68541							-7.28695	0.75994						-7.21583	0.68793
	-7.23196	0.35637						-7.22689	0.40589	1.65589						-7.24949	0.48882							-7.23495	0.61012						-7.16383	1.65081
	-7.17996	0.41357						-7.17489	0.7926	2.0426						-7.19649	1.02338							-7.18295	2.11581						-7.11083	7.35217
	-7.12796	4.28787						-7.12289	6.20547	7.45547						-7.14449	6.79334							-7.13095	8.58996						-7.05883	8.30726
	-7.07596	10.1447						-7.07089	9.99555	11.2455						-7.09249	9.76347							-7.07795	7.68923						-7.00683	2.41127
	-7.02396	5.24327						-7.01889	3.18416	4.43416						-7.04049	2.62922							-7.02595	1.4667						-6.95383	0.18316
	-6.97196	0.63693						-6.96689	0.26121	1.51121						-6.98849	0.20249							-6.97395	0.115						-6.90183	0.19854
	-6.91996	0.30712						-6.91489	0.29563	1.54563						-6.93649	0.35124							-6.92195	0.2962						-6.84983	0.20017
	-6.86796	0.19701						-6.86289	0.19697	1.44697						-6.88349	0.2501							-6.86995	0.22952						-6.79683	0.03731
	-6.81596	0.02567						-6.80989	0.04298	1.29298						-6.83149	0.20657							-6.81695	0.22324						-6.74483	0.27664
	-6.76396	0.23733						-6.75789	0.60382	1.85382						-6.77949	1.73764							-6.76495	1.83021						-6.69283	2.23685
	-6.71196	1.86767						-6.70589	2.78464	4.03464						-6.72749	3.06437							-6.71295	3.15791						-6.63983	3.26229
	-6.65996	2.99818						-6.65389	2.49297	3.74297						-6.67549	1.14192							-6.66095	1.19662						-6.58783	1.17518
	-6.60796	1.12848						-6.60189	0.60917	1.85917						-6.62349	0.43334							-6.60795	0.64762						-6.53583	2.77006
	-6.55596	1.61253						-6.54989	2.50673	3.75673						-6.57049	3.66611							-6.55595	4.87044						-6.48283	8.25466
	-6.50396	6.12082						-6.49789	7.65162	8.90162						-6.51849	8.20799							-6.50395	9.02264						-6.43083	6.38304
	-6.45196	6.31611						-6.44589	6.03368	7.28368						-6.46649	4.92474							-6.45195	3.97366						-6.37883	2.48993
	-6.39896	4.06048						-6.39389	3.0293	4.2793						-6.41449	2.45535							-6.39895	2.00976						-6.32683	1.10593
	-6.34696	2.5771						-6.34189	1.763	3.013						-6.36249	1.63096							-6.34695	1.10375						-6.27383	0.66801
	-6.29496	0.99831						-6.28989	0.75032	2.00032						-6.30949	0.7941							-6.29495	0.72675						-6.22183	0.75468
	-6.24296	0.46439						-6.23689	0.65082	1.90082						-6.25749	0.73882							-6.24295	0.7914						-6.16983	1.0085
	-6.19096	0.8781						-6.18489	1.00467	2.25467						-6.20549	0.98364							-6.19095	1.01334						-6.11683	1.53474
	-6.13896	1.12731						-6.13289	1.08848	2.33848						-6.15349	1.22458							-6.13795	1.77398						-6.06483	3.53924
	-6.08696	1.09885						-6.08089	2.18362	3.43362						-6.10149	2.75662							-6.08595	3.73517						-6.01283	3.20772
	-6.03496	3.1209						-6.02889	3.93777	5.18777						-6.04949	3.60986							-6.03395	2.58413						-5.95983	1.1133
	-5.98296	3.57983						-5.97689	2.06321	3.31321						-5.99649	1.52159							-5.98195	1.00412						-5.90783	1.7512
	-5.93096	2.08589						-5.92489	1.71829	2.96829						-5.94449	1.9163							-5.92895	2.09748						-5.85583	3.20805
	-5.87896	2.40066						-5.87289	2.83773	4.08773						-5.89249	2.94772							-5.87695	3.15452						-5.80283	2.97129
	-5.82696	3.08736						-5.82089	3.12526	4.37526						-5.84049	2.78486							-5.82495	2.6024						-5.75083	2.75827
	-5.77496	3.00659						-5.76889	2.41696	3.66696						-5.78849	2.30329							-5.77295	2.70303						-5.69883	4.66365
	-5.72296	3.31665						-5.71689	3.74964	4.99964						-5.73549	3.97125							-5.71995	4.67856						-5.64583	3.83156
	-5.67096	4.41277						-5.66389	4.31129	5.56129						-5.68349	4.31421							-5.66795	3.79993						-5.59383	2.03698
	-5.61896	2.86546						-5.61189	2.66701	3.91701						-5.63149	2.70446							-5.61595	2.17748						-5.54183	1.03381
	-5.56696	1.32859						-5.55989	1.27126	2.52126						-5.57949	1.27813							-5.56395	1.07325						-5.48883	1.04639
	-5.51496	0.83637						-5.50789	0.8549	2.1049						-5.52749	0.88007							-5.51195	1.01255						-5.43683	1.52641
	-5.46296	0.78769						-5.45589	1.17608	2.42608						-5.47549	1.21546							-5.45895	1.43045						-5.38483	2.42044
	-5.41096	1.37067						-5.40389	1.94097	3.19097						-5.42249	1.8843							-5.40695	2.27665						-5.33183	3.58858
	-5.35896	3.35188						-5.35189	3.69565	4.94565						-5.37049	3.65391							-5.35495	3.86431						-5.27983	4.13795
	-5.30696	4.77211						-5.29989	4.10432	5.35432						-5.31849	4.01516							-5.30295	4.01205						-5.22783	3.00688
	-5.25496	3.87796						-5.24789	3.36604	4.61604						-5.26649	3.20652							-5.24995	2.96771						-5.17483	1.74244
	-5.20296	2.3996						-5.19589	2.04609	3.29609						-5.21449	2.26058							-5.19795	1.96211						-5.12283	1.47553
	-5.15096	1.03726						-5.14389	1.44518	2.69518						-5.16149	1.57395							-5.14595	1.44445						-5.07083	1.07796
	-5.09896	1.1542						-5.09089	1.35955	2.60955						-5.10949	1.28177							-5.09395	1.06378						-5.01783	0.96406
	-5.04696	1.52369						-5.03889	1.23759	2.48759						-5.05749	1.17594							-5.04095	0.93669						-4.96583	1.45445
	-4.99496	1.63948						-4.98689	1.48976	2.73976						-5.00549	1.38376							-4.98895	1.30787						-4.91383	2.22176
	-4.94296	2.04137						-4.93489	1.93443	3.18443						-4.95349	1.98999							-4.93695	2.14221						-4.86083	1.77085
	-4.89096	2.14741						-4.88289	1.93182	3.18182						-4.90149	2.27643							-4.88495	1.92855						-4.80883	2.46132
	-4.83896	2.38859						-4.83089	2.11116	3.36116						-4.84849	2.37882							-4.83295	2.245						-4.75683	4.87773
	-4.78696	3.05377						-4.77889	3.26537	4.51537						-4.79649	3.03773							-4.77995	3.75345						-4.70383	5.18245
	-4.73396	3.42213						-4.72689	4.43022	5.68022						-4.74449	3.67539							-4.72795	5.16607						-4.65183	4.49314
	-4.68196	3.94584						-4.67489	5.56126	6.81126						-4.69249	5.20097							-4.67595	5.71634						-4.59983	3.58639
	-4.62996	4.89642						-4.62289	4.48209	5.73209						-4.64049	4.9907							-4.62395	3.82462						-4.54683	2.41531
	-4.57796	3.89666						-4.57089	2.67372	3.92372						-4.58849	2.81948							-4.57095	2.21218						-4.49483	2.01036
	-4.52596	2.29244						-4.51889	1.92641	3.17641						-4.53549	1.91873							-4.51895	1.93692						-4.44283	1.76406
	-4.47396	1.56455						-4.46589	1.67332	2.92332						-4.48349	1.68591							-4.46695	1.74677						-4.38983	1.84786
	-4.42196	1.84231						-4.41389	1.89192	3.14192						-4.43149	1.88971							-4.41495	1.88272						-4.33783	1.59803
	-4.36996	1.81147						-4.36189	1.69754	2.94754						-4.37949	1.77585							-4.36295	1.59093						-4.28583	1.89535
	-4.31796	1.61394						-4.30989	1.57412	2.82412						-4.32749	1.58114							-4.30995	1.71303						-4.23283	2.51638
	-4.26596	2.28707						-4.25789	2.32862	3.57862						-4.27449	2.48808							-4.25795	2.67958						-4.18083	4.06727
	-4.21396	3.89763						-4.20589	3.93071	5.18071						-4.22249	4.27252							-4.20595	4.35525						-4.12883	3.92315
	-4.16196	4.47619						-4.15389	4.41111	5.66111						-4.17049	4.17667							-4.15395	3.81016						-4.07583	2.37726
	-4.10996	2.79028						-4.10189	2.62685	3.87685						-4.11849	2.23202							-4.10095	2.05946						-4.02383	3.65746
	-4.05796	2.63541						-4.04989	2.84919	4.09919						-4.06649	2.51901							-4.04895	2.98993						-3.97183	4.57453
	-4.00596	3.9512						-3.99789	4.40515	5.65515						-4.01449	4.27222							-3.99695	4.71528						-3.91983	2.86551
	-3.95396	3.99017						-3.94589	3.77098	5.02098						-3.96149	4.18149							-3.94495	3.55085						-3.86683	2.05804
	-3.90196	2.66112						-3.89289	2.34223	3.59223						-3.90949	2.50437							-3.89195	2.25449						-3.81483	2.72167
	-3.84996	1.84576						-3.84089	1.82736	3.07736						-3.85749	2.01634							-3.83995	2.49486						-3.76283	6.46357
	-3.79796	2.7189						-3.78889	3.70407	4.95407						-3.80549	4.65094							-3.78795	5.80549						-3.70983	7.37306
	-3.74596	5.88615						-3.73689	6.88861	8.13861						-3.75349	6.8015							-3.73595	6.98579						-3.65783	4.2331
	-3.69396	5.81905						-3.68489	5.42471	6.67471						-3.70049	4.37968							-3.68395	4.36936						-3.60583	3.42192
	-3.64196	4.65701						-3.63289	4.51993	5.76993						-3.64849	4.15368							-3.63095	4.11764						-3.55283	2.94222
	-3.58996	5.34696						-3.58089	4.74551	5.99551						-3.59649	4.78321							-3.57895	3.80428						-3.50083	3.88497
	-3.53796	3.89588						-3.52889	3.5553	4.8053						-3.54449	4.3596							-3.52695	4.40557						-3.44883	8.36625
	-3.48596	5.07968						-3.47689	6.21744	7.46744						-3.49249	7.3327							-3.47495	8.06546						-3.39583	7.69943
	-3.43396	7.91424						-3.42489	7.83721	9.08721						-3.44049	6.55726							-3.42195	6.3453						-3.34383	6.77395
	-3.38196	6.37321						-3.37289	7.07308	8.32308						-3.38749	6.58534							-3.36995	6.99144						-3.29183	5.55083
	-3.32996	7.50818						-3.31989	6.69522	7.94522						-3.33549	6.74906							-3.31795	6.29816						-3.23883	8.07152
	-3.27796	6.68404						-3.26789	7.24323	8.49323						-3.28349	7.31679							-3.26595	8.22195						-3.18683	5.20783
	-3.22596	8.33547						-3.21589	7.12214	8.37214						-3.23149	6.88756							-3.21295	4.96216						-3.13483	2.02165
	-3.17396	3.90936						-3.16389	2.64799	3.89799						-3.17949	2.39811							-3.16095	1.82043						-3.08183	1.49701
	-3.12196	1.41461						-3.11189	1.31265	2.56265						-3.12749	1.37355							-3.10895	1.30131						-3.02983	1.99191
	-3.06996	1.29735						-3.05989	1.41101	2.66101						-3.07449	1.31414							-3.05695	1.54315						-2.97783	1.88309
	-3.01696	1.65851						-3.00789	1.81078	3.06078						-3.02249	1.75316							-3.00495	1.96276						-2.92483	1.66406
	-2.96496	1.83252						-2.95589	1.76035	3.01035						-2.97049	1.78599							-2.95195	1.75551						-2.87283	1.44674
	-2.91296	1.70623						-2.90389	1.72558	2.97558						-2.91849	1.74838							-2.89995	1.75882						-2.82083	0.88361
	-2.86096	1.38964						-2.85189	1.34742	2.59742						-2.86649	1.51608							-2.84795	1.33509						-2.76783	0.53584
	-2.80896	0.88766						-2.79989	0.85051	2.10051						-2.81349	0.99723							-2.79595	0.74556						-2.71583	0.45619
	-2.75696	0.56433						-2.74689	0.53963	1.78963						-2.76149	0.55438							-2.74295	0.47457						-2.66383	0.43562
	-2.70496	0.4388						-2.69489	0.44526	1.69526						-2.70949	0.42998							-2.69095	0.4463						-2.61083	0.37714
	-2.65296	0.34544						-2.64289	0.36928	1.61928						-2.65749	0.36486							-2.63895	0.36543						-2.55883	0.44134
	-2.60096	0.27162						-2.59089	0.35042	1.60042						-2.60549	0.29292							-2.58695	0.38749						-2.50683	0.47207
	-2.54896	0.44249						-2.53889	0.50815	1.75815						-2.55349	0.43917							-2.53395	0.46873						-2.45383	0.36635
	-2.49696	0.52622						-2.48689	0.46357	1.71357						-2.50049	0.4823							-2.48195	0.41228						-2.40183	0.34303
	-2.44496	0.3353						-2.43489	0.30981	1.55981						-2.44849	0.32952							-2.42995	0.31671						-2.34983	0.41874
	-2.39296	0.31905						-2.38289	0.37231	1.62231						-2.39649	0.34215							-2.37795	0.39276						-2.29683	0.39933
	-2.34096	0.40386						-2.33089	0.44219	1.69219						-2.34449	0.41389							-2.32595	0.41222						-2.24483	0.32628
	-2.28896	0.39556						-2.27889	0.36605	1.61605						-2.29249	0.36463							-2.27295	0.34158						-2.19283	0.37439
	-2.23696	0.39157						-2.22689	0.35871	1.60871						-2.23949	0.35571							-2.22095	0.352						-2.13983	0.38888
	-2.18496	0.41197						-2.17389	0.39863	1.64863						-2.18749	0.41891							-2.16895	0.41016						-2.08783	0.30385
	-2.13296	0.34348						-2.12189	0.34437	1.59437						-2.13549	0.36696							-2.11695	0.34603						-2.03583	0.30006
	-2.08096	0.34232						-2.06989	0.32363	1.57363						-2.08349	0.31537							-2.06395	0.29399						-1.98283	0.26202
	-2.02896	0.37317						-2.01789	0.3282	1.5782						-2.03149	0.34147							-2.01195	0.30976						-1.93083	0.1885
	-1.97696	0.24587						-1.96589	0.21893	1.46893						-1.97949	0.26906							-1.95995	0.2232						-1.87883	0.17734
	-1.92496	0.15209						-1.91389	0.15316	1.40316						-1.92649	0.177							-1.90795	0.16763						-1.82583	0.28332
	-1.87296	0.17225						-1.86189	0.20165	1.45165						-1.87449	0.19592							-1.85495	0.24085						-1.77383	0.32688
	-1.82096	0.25139						-1.80989	0.29012	1.54012						-1.82249	0.30089							-1.80295	0.34387						-1.72183	0.28677
	-1.76896	0.2814						-1.75789	0.29348	1.54348						-1.77049	0.31411							-1.75095	0.29295						-1.66983	0.27217
	-1.71696	0.27898						-1.70589	0.27513	1.52513						-1.71849	0.2598							-1.69895	0.27057						-1.61683	0.22204
	-1.66496	0.26102						-1.65389	0.24178	1.49178						-1.66649	0.25608							-1.64695	0.24507						-1.56483	0.30959
	-1.61296	0.21903						-1.60089	0.22875	1.47875						-1.61349	0.22348							-1.59395	0.24721						-1.51283	0.3865
	-1.56096	0.29732						-1.54889	0.33897	1.58897						-1.56149	0.30076							-1.54195	0.35947						-1.45983	0.42228
	-1.50896	0.36781						-1.49689	0.36649	1.61649						-1.50949	0.40191							-1.48995	0.4276						-1.40783	0.40773
	-1.45696	0.38459						-1.44489	0.42444	1.67444						-1.45749	0.46772							-1.43795	0.44561						-1.35583	0.37019
	-1.40496	0.40016						-1.39289	0.41595	1.66595						-1.40549	0.39824							-1.38495	0.36004						-1.30283	0.36457
	-1.35196	0.40592						-1.34089	0.37489	1.62489						-1.35249	0.32155							-1.33295	0.33039						-1.25083	0.37367
	-1.29996	0.45039						-1.28889	0.40493	1.65493						-1.30049	0.38764							-1.28095	0.37883						-1.19883	0.2893
	-1.24796	0.44163						-1.23689	0.3799	1.6299						-1.24849	0.40264							-1.22895	0.35152						-1.14583	0.19235
	-1.19596	0.29288						-1.18489	0.26171	1.51171						-1.19649	0.28732							-1.17595	0.23468						-1.09383	0.14233
	-1.14396	0.2024						-1.13289	0.18869	1.43869						-1.14449	0.20928							-1.12395	0.18248						-1.04183	0.1284
	-1.09196	0.16691						-1.08089	0.14665	1.39665						-1.09249	0.16575							-1.07195	0.13842						-0.98883	0.16897
	-1.03996	0.10787						-1.02889	0.11794	1.36794						-1.03949	0.11354							-1.01995	0.1417						-0.93683	0.30785
	-0.98796	0.14802						-0.97589	0.22433	1.47433						-0.98749	0.20229							-0.96795	0.23924						-0.88483	0.4645
	-0.93596	0.40478						-0.92389	0.39123	1.64123						-0.93549	0.39856							-0.91495	0.40552						-0.83183	0.49025
	-0.88396	0.51912						-0.87189	0.42917	1.67917						-0.88349	0.43709							-0.86295	0.49903						-0.77983	0.40869
	-0.83196	0.42324						-0.81989	0.40248	1.65248						-0.83149	0.41973							-0.81095	0.46153						-0.72783	0.18561
	-0.77996	0.31217						-0.76789	0.44698	1.69698						-0.77849	0.42646							-0.75895	0.25611						-0.67483	0.19981
	-0.72796	0.41465						-0.71589	0.2585	1.5085						-0.72649	0.23226							-0.70595	0.16078						-0.62283	0.62892
	-0.67596	0.21898						-0.66389	0.13812	1.38812						-0.67449	0.16941							-0.65395	0.45031						-0.57083	0.74272
	-0.62396	0.29028						-0.61189	0.5605	1.8105						-0.62249	0.59231							-0.60195	0.68239						-0.51783	0.41288
	-0.57196	0.79993						-0.55989	0.84389	2.09389						-0.57049	0.73303							-0.54995	0.56446						-0.46583	0.12063
	-0.51996	0.78741						-0.50789	0.47685	1.72685						-0.51849	0.43927							-0.49695	0.22						-0.41383	0.11939
	-0.46796	0.25238						-0.45589	0.14226	1.39226						-0.46549	0.14082							-0.44495	0.09069						-0.36083	0.22511
	-0.41596	0.12502						-0.40289	0.14002	1.39002						-0.41349	0.1154							-0.39295	0.15577						-0.30883	0.18296
	-0.36396	0.21481						-0.35089	0.22381	1.47381						-0.36149	0.20995							-0.34095	0.2201						-0.25683	0.15346
	-0.31196	0.18371						-0.29889	0.16695	1.41695						-0.30949	0.18086							-0.28895	0.15788						-0.20383	0.20762
	-0.25996	0.14976						-0.24689	0.15926	1.40926						-0.25749	0.15188							-0.23595	0.17297						-0.15183	0.18799
	-0.20796	0.19912						-0.19489	0.20836	1.45836						-0.20549	0.20608							-0.18395	0.21905						-0.09983	0.19213
	-0.15596	0.19373						-0.14289	0.17565	1.42565						-0.15249	0.20517							-0.13195	0.19114						-0.04683	0.24957
	-0.10396	0.23362						-0.09089	0.201	1.451						-0.10049	0.20715							-0.07995	0.23315						0.00517	0.48111
	-0.05196	0.53351						-0.03889	0.33994	1.58994						-0.04849	0.27023							-0.02695	0.24934						0.05717	0.81452
	4e-05	0.51715						0.01311	0.69245	1.94245						0.00351	0.50838							0.02505	0.56139						0.11017	0.60117
	0.05204	0.56752						0.06511	0.71649	1.96649						0.05551	0.77272							0.07705	0.8342						0.16217	0.45981
	0.10404	0.56775						0.11711	0.46246	1.71246						0.10851	0.55277							0.12905	0.49287						0.21417	0.25895
	0.15604	0.45921						0.17011	0.43866	1.68866						0.16051	0.40451							0.18205	0.42028						0.26717	0.07967
	0.20804	0.36458						0.22211	0.27659	1.52659						0.21251	0.35646							0.23405	0.20589						0.31917	0.07327
	0.26004	0.11854						0.27411	0.08729	1.33729						0.26451	0.12556							0.28605	0.07476						0.37117	0.1033
	0.31204	0.07045						0.32611	0.07479	1.32479						0.31651	0.07362							0.33805	0.07941						0.42417	0.24193
	0.36504	0.11369						0.37811	0.12	1.37						0.36851	0.10945							0.39005	0.14308						0.47617	0.23515
	0.41704	0.24801						0.43011	0.25726	1.50726						0.42151	0.25019							0.44305	0.29109						0.52817	0.14699
	0.46904	0.25404						0.48211	0.22103	1.47103						0.47351	0.24649							0.49505	0.17426						0.58017	0.53833
	0.52104	0.14538						0.53411	0.18166	1.43166						0.52551	0.10619							0.54705	0.15356						0.63317	0.81658
	0.57304	0.45734						0.58611	0.57126	1.82126						0.57751	0.38058							0.59905	0.66393						0.68517	0.37435
	0.62504	0.75825						0.63811	0.75938	2.00938						0.62951	0.82497							0.65205	0.7549						0.73717	0.235
	0.67704	0.51948						0.69011	0.40272	1.65272						0.68251	0.53604							0.70405	0.33839						0.79017	0.24618
	0.72904	0.31733						0.74311	0.30527	1.55527						0.73451	0.32017							0.75605	0.27554						0.84217	0.13753
	0.78104	0.16326						0.79511	0.15761	1.40761						0.78651	0.1781							0.80805	0.14791						0.89417	0.19536
	0.83304	0.0911						0.84711	0.10713	1.35713						0.83851	0.06607							0.86005	0.14663						0.94717	0.08772
	0.88504	0.20066						0.89911	0.20206	1.45206						0.89051	0.19264							0.91305	0.18667						0.99917	0.06208
	0.93704	0.1168						0.95111	0.08895	1.33895						0.94251	0.15275							0.96505	0.08734						1.05117	0.09799
	0.98904	0.04074						1.00311	0.05568	1.30568						0.99551	0.0797							1.01705	0.07908						1.10417	0.27222
	1.04104	0.07792						1.05511	0.11781	1.36781						1.04751	0.09419							1.06905	0.13987						1.15617	0.28788
	1.09304	0.25529						1.10711	0.30142	1.55142						1.09951	0.26059							1.12205	0.32616						1.20817	0.10879
	1.14504	0.31168						1.15911	0.25212	1.50212						1.15151	0.29559							1.17405	0.2077						1.26117	0.13549
	1.19704	0.11609						1.21111	0.08646	1.33646						1.20351	0.10205							1.22605	0.0796						1.31317	0.33096
	1.24904	0.10835						1.26311	0.14071	1.39071						1.25651	0.1089							1.27805	0.17713						1.36517	0.32813
	1.30104	0.28835						1.31611	0.34902	1.59902						1.30851	0.27759							1.33105	0.34683						1.41817	0.1476
	1.35304	0.38015						1.36811	0.33724	1.58724						1.36051	0.35359							1.38305	0.30627						1.47017	0.20231
	1.40504	0.20918						1.42011	0.17417	1.42417						1.41251	0.23324							1.43505	0.18014						1.52217	0.19751
	1.45704	0.1765						1.47211	0.2102	1.4602						1.46451	0.21984							1.48705	0.22414						1.57517	0.10723
	1.50904	0.18705						1.52411	0.15515	1.40515						1.51651	0.17801							1.53905	0.14626						1.62717	0.07417
	1.56104	0.0977						1.57611	0.09344	1.34344						1.56951	0.11343							1.59205	0.10318						1.67917	0.01591
	1.61304	0.09497						1.62811	0.08735	1.33735						1.62151	0.09649							1.64405	0.05097						1.73217	0.0149
	1.66504	0.05686						1.68011	0.02896	1.27896						1.67351	0.0267							1.69605	0.00775						1.78417	0.07933
	1.71704	0.01295						1.73211	0.00831	1.25831						1.72551	0.00689							1.74805	0.02424						1.83617	0.1714
	1.76904	0.04431						1.78411	0.05739	1.30739						1.77751	0.05605							1.80105	0.11675						1.88917	0.20453
	1.82104	0.12438						1.83611	0.17386	1.42386						1.82951	0.173							1.85305	0.21172						1.94117	0.0823
	1.87304	0.23079						1.88911	0.24511	1.49511						1.88251	0.24237							1.90505	0.17425						1.99317	0.00766
	1.92504	0.16985						1.94111	0.10368	1.35368						1.93451	0.11192							1.95705	0.04237						2.04617	0.00013
	1.97704	0.03235						1.99311	0.00886	1.25886						1.98651	0.01091							2.01005	0.0021						2.09817	0
	2.03004	0.00125						2.04511	0.00012	1.25012						2.03851	0.00017							2.06205	2e-05						2.15017	0.00013
	2.08204	1e-05						2.09711	0	1.25						2.09051	0							2.11405	1e-05						2.20317	0.00275
	2.13404	3e-05						2.14911	0.00014	1.25014						2.14351	0.0001							2.16605	0.00064						2.25517	0.00905
	2.18604	0.00133						2.20111	0.00285	1.25285						2.19551	0.00251							2.21805	0.00612						2.30717	0.01014
	2.23804	0.00756						2.25311	0.00901	1.25901						2.24751	0.00937							2.27105	0.01019						2.36017	0.05442
	2.29004	0.00795						2.30511	0.00863	1.25863						2.29951	0.01039							2.32305	0.02113						2.41217	0.18303
	2.34204	0.0252						2.35711	0.05241	1.30241						2.35151	0.04918							2.37505	0.09494						2.46417	0.29271
	2.39404	0.12895						2.40911	0.17675	1.42675						2.40351	0.15329							2.42705	0.21806						2.51717	0.27208
	2.44604	0.25421						2.46111	0.27187	1.52187						2.45651	0.26194							2.48005	0.28725						2.56917	0.1711
	2.49804	0.30864						2.51411	0.26258	1.51258						2.50851	0.26916							2.53205	0.21111						2.62117	0.15193
	2.55004	0.2042						2.56611	0.15964	1.40964						2.56051	0.15441							2.58405	0.15793						2.67417	0.19466
	2.60204	0.1324						2.61811	0.15061	1.40061						2.61251	0.16525							2.63605	0.16677						2.72617	0.36001
	2.65404	0.16107						2.67011	0.19895	1.44895						2.66451	0.18332							2.68905	0.20949						2.77817	0.38474
	2.70604	0.29525						2.72211	0.35515	1.60515						2.71751	0.30668							2.74105	0.39652						2.83117	0.20134
	2.75804	0.43894						2.77411	0.41187	1.66187						2.76951	0.4321							2.79305	0.35939						2.88317	0.07947
	2.81004	0.28666						2.82611	0.20092	1.45092						2.82151	0.22788							2.84505	0.13898						2.93517	0.07338
	2.86204	0.11499						2.87811	0.07688	1.32688						2.87351	0.08714							2.89705	0.0621						2.98717	0.04493
	2.91404	0.07134						2.93011	0.07754	1.32754						2.92551	0.08067							2.95005	0.0789						3.04017	0.17203
	2.96604	0.0478						2.98211	0.05586	1.30586						2.97751	0.06091							3.00205	0.03888						3.09217	0.62153
	3.01804	0.06645						3.03411	0.11382	1.36382						3.03051	0.07167							3.05405	0.18434						3.14417	0.54112
	3.07004	0.37348						3.08711	0.50814	1.75814						3.08251	0.40605							3.10605	0.63594						3.19717	0.24527
	3.12204	0.59294						3.13911	0.54423	1.79423						3.13451	0.62974							3.15905	0.52818						3.24917	0.16076
	3.17404	0.34188						3.19111	0.27199	1.52199						3.18651	0.34218							3.21105	0.2078						3.30117	0.0922
	3.22604	0.18003						3.24311	0.1485	1.3985						3.23851	0.15726							3.26305	0.16889						3.35417	0.26585
	3.27804	0.17992						3.29511	0.20188	1.45188						3.29051	0.17802							3.31505	0.12779						3.40617	0.46623
	3.33004	0.23364						3.34711	0.266	1.516						3.34351	0.19559							3.36805	0.26805						3.45817	0.23375
	3.38204	0.31385						3.39911	0.37558	1.62558						3.39551	0.31454							3.42005	0.41676						3.51117	0.15247
	3.43404	0.36197						3.45111	0.27025	1.52025						3.44751	0.35516							3.47205	0.22537						3.56317	0.22208
	3.48604	0.15247						3.50311	0.11758	1.36758						3.49951	0.16412							3.52405	0.1714						3.61517	0.18362
	3.53804	0.19847						3.55511	0.23489	1.48489						3.55151	0.23236							3.57605	0.24057						3.66817	0.27328
	3.59004	0.21854						3.60711	0.20544	1.45544						3.60451	0.26879							3.62905	0.23167						3.72017	0.19444
	3.64204	0.19686						3.66011	0.25621	1.50621						3.65651	0.28572							3.68105	0.28461						3.77217	0.10684
	3.69404	0.28805						3.71211	0.23472	1.48472						3.70851	0.21208							3.73305	0.1424						3.82517	0.38781
	3.74704	0.17031						3.76411	0.11446	1.36446						3.76051	0.12012							3.78505	0.15338						3.87717	0.79331
	3.79904	0.14822						3.81611	0.28362	1.53362						3.81251	0.37604							3.83805	0.56368						3.92917	1.03087
	3.85104	0.53924						3.86811	0.74467	1.99467						3.86451	0.81773							3.89005	0.91873						3.98217	1.16045
	3.90304	0.89577						3.92011	0.94501	2.19501						3.91751	0.97428							3.94205	1.06945						4.03417	0.80472
	3.95504	0.98203						3.97211	1.07099	2.32099						3.96951	1.07701							3.99405	1.0178						4.08617	0.53244
	4.00704	0.94531						4.02411	0.80818	2.05818						4.02151	0.6711							4.04705	0.63121						4.13917	0.54818
	4.05904	0.56512						4.07611	0.55849	1.80849						4.07351	0.54164							4.09905	0.48377						4.19117	0.51801
	4.11104	0.57364						4.12811	0.53108	1.78108						4.12551	0.54257							4.15105	0.54762						4.24317	0.26317
	4.16304	0.57315						4.18011	0.50633	1.75633						4.17851	0.41418							4.20305	0.34697						4.29617	0.60807
	4.21504	0.34737						4.23311	0.28724	1.53724						4.23051	0.24773							4.25505	0.32187						4.34817	1.06224
	4.26704	0.36285						4.28511	0.51625	1.76625						4.28251	0.51265							4.30805	0.69424						4.40017	1.26914
	4.31904	0.7898						4.33711	0.98313	2.23313						4.33451	1.01421							4.36005	1.09045						4.45317	1.35045
	4.37104	1.17579						4.38911	1.22825	2.47825						4.38651	1.20925							4.41205	1.21512						4.50517	1.22105
	4.42304	1.26819						4.44111	1.23461	2.48461						4.43851	1.09392							4.46405	1.17678						4.55717	0.96048
	4.47504	1.17659						4.49311	1.11139	2.36139						4.49151	1.0137							4.51705	1.07572						4.61017	0.71423
	4.52704	1.04998						4.54511	1.03652	2.28652						4.54351	1.03524							4.56905	1.09607						4.66217	0.54801
	4.57904	0.97388						4.59711	0.85416	2.10416						4.59551	0.99177							4.62105	0.73658						4.71417	0.35827
	4.63104	0.58671						4.64911	0.46814	1.71814						4.64751	0.53452							4.67305	0.47408						4.76717	0.46515
	4.68304	0.39042						4.70111	0.39554	1.64554						4.69951	0.37539							4.72605	0.33803						4.81917	0.73957
	4.73504	0.30027						4.75311	0.33744	1.58744						4.75151	0.33724							4.77805	0.49145						4.87117	0.74208
	4.78704	0.36008						4.80611	0.55759	1.80759						4.80451	0.58998							4.83005	0.8339						4.92417	0.71036
	4.83904	0.76911						4.85811	0.94714	2.19714						4.85651	0.98567							4.88205	0.8516						4.97617	0.59414
	4.89104	1.03391						4.91011	0.89068	2.14068						4.90851	0.8545							4.93405	0.67317						5.02817	0.70001
	4.94304	0.6974						4.96211	0.54367	1.79367						4.96051	0.52381							4.98705	0.52899						5.08117	0.93156
	4.99504	0.46889						5.01411	0.48427	1.73427						5.01251	0.49593							5.03905	0.58932						5.13317	1.00001
	5.04704	0.59634						5.06611	0.72209	1.97209						5.06551	0.71236							5.09105	0.81151						5.18517	0.94872
	5.09904	0.97906						5.11811	0.96946	2.21946						5.11751	0.8847							5.14305	0.90378						5.23717	1.00667
	5.15104	0.87425						5.17011	0.92342	2.17342						5.16951	0.84018							5.19605	0.93589						5.29017	0.87428
	5.20304	0.99085						5.22211	1.17594	2.42594						5.22151	1.07862							5.24805	1.06747						5.34217	0.66555
	5.25504	1.06197						5.27411	0.84032	2.09032						5.27351	0.98153							5.30005	0.9175						5.39417	0.67462
	5.30704	0.63473						5.32611	0.60413	1.85413						5.32551	0.68389							5.35205	0.65687						5.44717	0.59173
	5.35904	0.53408						5.37911	0.52954	1.77954						5.37851	0.51059							5.40505	0.54498						5.49917	0.81121
	5.41204	0.58829						5.43111	0.74833	1.99833						5.43051	0.74169							5.45705	0.79134						5.55117	1.07451
	5.46404	0.86054						5.48311	0.97664	2.22664						5.48251	0.94577							5.50905	1.0897						5.60417	0.96106
	5.51604	0.94895						5.53511	0.94647	2.19647						5.53451	0.959							5.56105	1.11008						5.65617	0.69296
	5.56804	0.85218						5.58711	0.83047	2.08047						5.58651	0.83717							5.61305	0.74348						5.70817	0.7912
	5.62004	0.72521						5.63911	0.68198	1.93198						5.63951	0.6802							5.66605	0.60659						5.76117	0.83216
	5.67204	0.80829						5.69111	0.81531	2.06531						5.69151	0.7575							5.71805	0.72273						5.81317	0.73131
	5.72404	0.89207						5.74311	0.92413	2.17413						5.74351	0.89378							5.77005	0.79584						5.86517	0.74016
	5.77604	0.87887						5.79511	0.85659	2.10659						5.79551	0.94361							5.82205	0.86263						5.91817	0.69763
	5.82804	0.76589						5.84711	0.6451	1.8951						5.84751	0.73734							5.87505	0.70625						5.97017	0.66261
	5.88004	0.56173						5.89911	0.5374	1.7874						5.89951	0.54773							5.92705	0.62138						6.02217	0.78868
	5.93204	0.49185						5.95111	0.55196	1.80196						5.95251	0.48383							5.97905	0.70957						6.07517	0.85494
	5.98404	0.76217						6.00411	0.88081	2.13081						6.00451	0.84562							6.03105	0.76777						6.12717	0.95108
	6.03604	1.00703						6.05611	0.85915	2.10915						6.05651	0.86867							6.08305	0.79632						6.17917	0.92839
	6.08804	0.88516						6.10811	1.05698	2.30698						6.10851	1.13787							6.13605	1.19483						6.23217	0.90646
	6.14004	1.0064						6.16011	1.12966	2.37966						6.16051	1.08621							6.18805	1.07344						6.28417	0.92155
	6.19204	1.0707						6.21211	0.90244	2.15244						6.21351	0.85922							6.24005	0.76628						6.33617	0.84113
	6.24404	1.06822						6.26411	0.98155	2.23155						6.26551	0.93989							6.29205	0.78168						6.38917	0.96276
	6.29604	0.92787						6.31611	0.85015	2.10015						6.31751	0.90882							6.34505	1.0499						6.44117	0.91674
	6.34804	0.70314						6.36811	0.76164	2.01164						6.36951	0.79732							6.39705	0.94205						6.49317	1.04088
	6.40004	0.77937						6.42011	0.89303	2.14303						6.42151	0.87516							6.44905	0.87297						6.54617	0.99506
	6.45204	0.96728						6.47211	0.90791	2.15791						6.47351	0.89355							6.50105	0.86346						6.59817	0.82687
	6.50404	0.87278						6.52411	0.85436	2.10436						6.52651	0.82025							6.55405	0.93118						6.65017	0.84535
	6.55604	0.80573						6.57711	0.92331	2.17331						6.57851	0.88959							6.60605	0.96298						6.70317	1.02082
	6.60804	1.06833						6.62911	1.14615	2.39615						6.63051	1.16164							6.65805	0.95929						6.75517	1.12467
	6.66004	1.18966						6.68111	1.13948	2.38948						6.68251	1.15546							6.71005	1.06502						6.80717	0.96397
	6.71204	1.04679						6.73311	1.05447	2.30447						6.73451	1.04948							6.76205	1.21867						6.86017	1.03363
	6.76404	0.8912						6.78511	0.91628	2.16628						6.78651	0.96394							6.81505	1.02542						6.91217	1.16185
	6.81604	0.88381						6.83711	0.87809	2.12809						6.83951	0.92576							6.86705	0.98769						6.96417	0.96589
	6.86804	0.96699						6.88911	0.96639	2.21639						6.89151	0.98903							6.91905	1.02687						7.01717	1.03983
	6.92004	0.9812						6.94111	0.98543	2.23543						6.94351	0.97869							6.97105	1.09979						7.06917	1.31284
	6.97204	1.05244						6.99311	1.10827	2.35827						6.99551	0.96354							7.02405	1.02303						7.12117	1.19453
	7.02404	1.19981						7.04511	1.21371	2.46371						7.04751	1.20665							7.07605	0.96463						7.17417	1.01709
	7.07604	1.0795						7.09711	1.11633	2.36633						7.10051	1.22089							7.12805	0.98671						7.22617	1.10374
	7.12904	1.03204						7.15011	1.02929	2.27929						7.15251	1.04044							7.18005	1.11665						7.27817	0.78537
	7.18104	0.84807						7.20211	0.67098	1.92098						7.20451	0.69166							7.23305	0.82988						7.33117	0.38681
	7.23304	0.40906						7.25411	0.19405	1.44405						7.25651	0.19464							7.28505	0.29682						7.38317	0.17623
	7.28504	0.06245						7.30611	0.01442	1.26442						7.30851	0.01429							7.33705	0.0331						7.43517	0.0309
	7.33704	0.00176						7.35811	0.00019	1.25019						7.36051	0.00019							7.38905	0.00077						7.48817	0.00109
	7.38904	1e-05						7.41011	0	1.25						7.41351	0							7.44105	0						7.54017	1e-05
	7.44104	0						7.46211	0	1.25						7.46551	0							7.49405	0						7.59217	0
	7.49304	0						7.51411	0	1.25						7.51751	0							7.54605	0						7.64417	0
	7.54504	0						7.56611	0	1.25						7.56951	0							7.59805	0						7.69717	0
	7.59704	0						7.61811	0	1.25						7.62151	0							7.65005	0						7.74917	0
	7.64904	0						7.67011	0	1.25						7.67451	0							7.70305	0						7.80117	0
	7.70104	0						7.72311	0	1.25						7.72651	0							7.75505	0						7.85417	0
	7.75304	0						7.77511	0	1.25						7.77851	0							7.80705	0						7.90617	0
	7.80504	0						7.82711	0	1.25						7.83051	0							7.85905	0						7.95817	0
	7.85704	0						7.87911	0	1.25						7.88251	0							7.91205	0						8.01117	0
	7.90904	0						7.93111	0	1.25						7.93451	0							7.96405	0						8.06317	0
	7.96104	0						7.98311	0	1.25						7.98751	0							8.01605	0						8.11517	0
	8.01304	0						8.03511	0	1.25						8.03951	0							8.06805	0						8.16817	0
	8.06504	0						8.08711	0	1.25						8.09151	0							8.12005	0						8.22017	0
	8.11704	0						8.13911	0	1.25						8.14351	0							8.17305	0						8.27217	0
	8.16904	0						8.19111	0	1.25						8.19551	0							8.22505	0						8.32517	0
	8.22104	0						8.24311	0	1.25						8.24751	0							8.27705	0						8.37717	0
	8.27304	0						8.29611	0	1.25						8.30051	0							8.32905	0						8.42917	0
	8.32504	0						8.34811	0	1.25						8.35251	0							8.38205	0						8.48217	0
	8.37704	0						8.40011	0	1.25						8.40451	0							8.43405	0						8.53417	0

[truncated: 11 more sheets: Figure 4b, Figure 4c, Figure 4d, SI Figure 2i, Figure 5a, Figure 5c, Figure 5d, Figure 5e, Figure 6b, Figure6c, Figure6g]
